# Supplementary material for: Content analysis of social media regarding obesity as a chronic disease
Source: PeerJ Comput Sci. 2023 Apr 24;9:e1321. doi: 10.7717/peerj-cs.1321 (PMC10280592; doi:10.7717/peerj-cs.1321)
Supplement: Supplemental Information 1 [file peerj-cs-09-1321-s001.xlsm]

## Sheet: raw_data
ID	Organization	Location	Date	Post	FINAL Rate	Final comment	Final rate 2	Final comment 2
1	Org1	Twitter	2021-01-29	Getting older comes with its own set of challenges, but did you know that weight management can be one of them? As we age, weight management often becomes more difficult.	1
2	Org1	Twitter	2021-01-29	Support is a crucial part of anyone’s weight-loss journey. With all the #physical, #mental & #emotional changes at play, this journey can sometimes be difficult. It’s normal to experience various setbacks before finding the approach that works for you.	4
3	Org1	Twitter	2021-01-28	The Obesity Action Coalition (OAC) is pleased to share that Optifast ® has renewed its support of OAC at the Bronze level as a member of our Chairman’s Council. Thank you, Optifast®, for continuing to support and champion the OAC’s mission!	1
4	Org1	Twitter	2021-01-27	While it was thought that only seniors and people with immune disorders were at increased risk for severe illness, #obesity has emerged as a strong and independent risk factor for severe infection and death due to COVID-19	7
5	Org1	Twitter	2021-01-25	Have you ever completed a power-packed workout or done a lot of exercise, only to feel hungry immediately afterward?	1
6	Org1	Twitter	2021-01-22	Did you miss our monthly broadcast on Wednesday? No worries! You can watch the recording! No worries! You can still watch it on our Facebook, Instagram, or Youtube Channel! Click, watch and comment below to let us know your thoughts!	1
7	Org1	Twitter	2021-01-21	#2021 is already bringing good news! '@ObesityMedicine has announced that a record 1,400+ physicians have applied to take the #2021 ABOM certification exam, which tests doctors for their competency in treating #obesity.	1
8	Org1	Twitter	2021-01-20	January is #ThyroidAwarenessMonth. Did you know that an estimated 20 million Americans have some form of thyroid disease, and up to 60 percent of those with thyroid disease are unaware of their condition?	1
9	Org1	Twitter	2021-01-20	"My vision for this campaign was something that would wake people up to the fact that bias exists & that it needs to stop. In a time where society is challenging so many things for the better, why can’t #weightbias have its own time in the spotlight?"	12
10	Org1	Twitter	2021-01-17	“I didn't recognize it for a long time. And when I did recognize it, I thought it was okay, because I thought I deserved poor treatment, less respect because of my #weight,” said Patty Nece, chairwoman of the OAC #StopWeightBias	12
11	Org1	Twitter	2021-01-12	Learn how you can #BePartoftheSolution to #StopWeightBias! Visit http://StopWeightBias.com & make sure to follow @StopWeightBias to get started	12
12	Org1	Twitter	2021-01-09	Let's work together to #StopWeightBias! Are you ready to #BePartoftheSolution?	12
13	Org1	Twitter	2021-01-08	Join us live for the world premiere of our #StopWeightBias Campaign to learn how you can #BePartofTheSolution to #StopWeightBias! Help us spread the word by sharing this post! https://fb.me/e/10ShsrgRI	12
14	Org1	Twitter	2021-01-07	How will you join the movement to #StopWeightBias? #BePartoftheSolution	12
15	Org1	Twitter	2021-01-06	Our words and actions matter. Weight shouldn’t dictate the way people are treated. Are you ready to #BePartoftheSolution?	12
16	Org1	Twitter	2021-01-06	Let the countdown begin! In one week we will be sharing our newest project with you! So mark your calendar and stay tuned! Are you ready to #BePartoftheSolution?	1
17	Org1	Twitter	2021-01-04	What are some of your #2021 resolutions? Whatever your goals for the new year might look like, you will need a strong foundation. Here are 10 important #wellnesstips to help you lay a strong foundation for a healthy #2021! http://ow.ly/TE9950CZKo2	1
18	Org1	Twitter	2021-01-01	YOU STILL HAVE TIME TO MAKE A DIFFERENCE AND MAKE YOUR TAX-DEDUCTIBLE DONATION NOW! http://ow.ly/tAiA50CXM8z	1
19	Org1	Twitter	2021-01-01	Donations of all sizes help us educate people on the topic of #obesity, fight to eliminate #weightbias, create a community of support, & enable us to continue to empower individuals affected by #obesity. http://ow.ly/OKfN50CXM7m	12
20	Org1	Twitter	2021-01-01	As we wrap a bow on 2020 here at the Obesity Action Coalition (OAC), it is humbling to look back on all that has taken place and all we’ve been able to accomplish with the support of our members.	1
21	Org1	Twitter	2020-12-31	2020 is right around the corner... but there's still time to change lives! Today is the last day to make your year-end donation and Give Your Why! #GiveYourWhy by making a tax-deductible donation now!	1
22	Org1	Twitter	2020-12-31	“The greatness of a community is most accurately measured by the compassionate actions of its members.” – Coretta Scott King	1
23	Org1	Twitter	2020-12-29	We can’t do it without you! Today, more than ever before, the need for a network of support has never been more evident. Your donation to the OAC will allow us to continue to provide support tools and resources to our Community free of charge! Donate now	1
24	Org1	Twitter	2020-12-26	Today, more than ever before, the need for a network of support has never been more evident. Your donation to the OAC will allow us to continue to provide support tools and resources to our Community free of charge! Donate today to support the OAC!	1
25	Org1	Twitter	2020-12-26	Here are some tips to help you avoid holiday weight gain while staying at home and taking care of yourself. You want to start the New Year off healthy!	1
26	Org1	Twitter	2020-12-25	Happy Holidays from the OAC! Help us celebrate this holiday season by donating to our Share Your Why, Give Your Why Campaign to help us keep making a difference! http://	1
27	Org1	Twitter	2020-12-25	As we close out the year, we hope you’ll consider all the reasons why OAC is meaningful to you and give by making a tax-deductible, year-end donation of any amount to our ongoing efforts!	1
28	Org1	Twitter	2020-12-24	Give today for a better tomorrow. If the vital need for OAC to continue advocating on behalf of all individuals with obesity is your "WHY," make a tax-deductible donation today!	1
29	Org1	Twitter	2020-12-24	A little indulgence during the holidays is okay if you do it in moderation. This time of year, family recipes & traditions are abundant! Being prepared will help you make #mindful & #healthy decisions while still enjoying the season.	1
30	Org1	Twitter	2020-12-23	#ShareYourWhy & #GiveYourWhy!This year, consider all the reasons why OAC is important to you and Give Your Why by making a tax-deductible, year-end donation!	1
31	Org1	Twitter	2020-12-23	Here is a short list of total body stretches that will help foster improved well-being and relieve chronic tension in your body.	1
32	Org1	Twitter	2020-12-23	As we close out the year, we hope you’ll consider all the reasons why OAC is meaningful to you and give by making a tax-deductible, year-end donation of any amount to our ongoing efforts!	1
33	Org1	Twitter	2020-12-22	Check out the OAC's Newsroom to learn more about our latest news and projects!	1
34	Org1	Twitter	2020-12-22	Donations in honor of #advocacy can help us continue to push for legislation such as #TROA & develop programming that will give more people the tools to be able to fight in the areas they are most passionate about!	1
35	Org1	Twitter	2020-12-21	Why do exercise and physical activity make a difference in mental health?	1
36	Org1	Twitter	2020-12-20	Our resources are created to help people that are fighting misinformation, #weightbias, & other factors that have held them back from living the life they've always wanted to. Make a #donation today & help us create & produce this valuable education!	1
37	Org1	Twitter	2020-12-19	As we close out 2020 here at the Obesity Action Coalition (OAC), we want to say “thank you” to our outstanding lineup of advertisers who have helped make OAC’s Weight Matters Magazine our most popular educational resource to date!	1
38	Org1	Twitter	2020-12-19	Last year, your generosity helped us get education into the hands of thousands! This year, please consider making a gift toward our end-of-year fundraising campaign & support the amazing work that happens at OAC every day!	1
39	Org1	Twitter	2020-12-17	For OAC Member Shenese Colwell of Houston, TX, patient advocacy is a big part of her life. Her personal experiences with obesity have helped her recognize the value of support in an individual’s health journey and having a community that empowers you.	13
40	Org1	Twitter	2020-12-17	We are excited to share that today, Dec 17th, '@ObesityAdvocacy has a meeting with @Transition46! Topics on the agenda include the importance of evidence-based #obesity treatment, #obesity & equity, & the need to pass #TROA! Share your thoughts with us & make sure to retweet!	1
41	Org1	Twitter	2020-12-16	Don't miss out! Join us today for the third episode of our broadcast at 3:00 PM EST! Comment below to let us know where you will be joining us from!	1
42	Org1	Twitter	2020-12-15	"The bottom line is that the mind and body are intimately linked, and when it comes to weight issues, it is necessary to appreciate how emotional issues can cause obesity and make it more difficult to effectively address."	4
43	Org1	Twitter	2020-12-14	As we close out the year, we hope you’ll consider all the reasons why OAC is meaningful to you and give by making a tax-deductible, year-end donation of any amount to our ongoing efforts! #ShareYourWhy	1
44	Org1	Twitter	2020-12-11	Please consider all the reasons OAC is meaningful to you and Give Your Why by making a year-end, tax-deductible donation of any amount to support the OAC's mission as we move forward into 2021.	1
45	Org1	Twitter	2020-12-10	Contrary to headline-grabbing speculation, data on the Pfizer COVID-19 vaccine tells us it works equally well in people whether or not they have obesity. This data comes from detailed briefing documents on the vaccine released on December 8th by the FDA.	1
46	Org1	Twitter	2020-12-08	#TuesdayTips If you’re trying to eat healthier, don’t worry – you don’t have to say “no” altogether to holiday treats. Instead, try these simple tips to lighten up your homemade holiday goodies and give them an added nutritional boost.	1
47	Org1	Twitter	2020-12-04	During this season of giving, we hope you can spare a moment to consider the OAC and our mission by participating in this year’s campaign: Share Your Why, Give Your Why!	1
48	Org1	Twitter	2020-12-03	We are living in a tumultuous time. And, the mantra to use our voices to make a positive change in the world is even more relevant today than ever before. My voice carries weight.	1
49	Org1	Twitter	2020-12-02	This #GivingTuesday, #ShareYourWhy & #GiveYourWhy ! Why do you give to the OAC? "Because they are passionate about fighting weight stigma & getting people to understand #obesity better by increasing awareness." Why do you support the OAC? #ShareYourWhy!	1
50	Org1	Twitter	2020-12-02	This #GivingTuesday, #ShareYourWhy & #GiveYourWhy to support the OAC! Why do you support the OAC? Share it with us and tag us by using #ShareYourWhy!	1
51	Org1	Twitter	2020-12-02	This #GivingTuesday, #ShareYourWhy & #GiveYourWhy! Why do you give to the OAC? "Because I appreciate the wealth of personal & professional resources they offer." Why do you support the OAC? Share it with us & tag us by using #ShareYourWhy!	1
52	Org1	Twitter	2020-12-01	This #GivingTuesday, #ShareYourWhy & #GiveYourWhy! Why do you give to the OAC? "Because they are a compassionate & authentic advocate & resource for people with obesity." Why do you support the OAC? Share it with us and tag us by using #ShareYourWhy!	1
53	Org1	Twitter	2020-12-01	This #GivingTuesday, #ShareYourWhy & #GiveYourWhy to support the OAC! Why do you give to the OAC? "Because they fight hard to change how people view obesity." Why do you support the OAC? Share it with us & tag us by using #ShareYourWhy!	1
54	Org1	Twitter	2020-12-01	This #GivingTuesday, #ShareYourWhy & #GiveYourWhy to support the OAC! Why do you give to the OAC? "Its community, people, the way we care & support one another" Why do you support the OAC? Share it with us & tag us by using #ShareYourWhy!	1
55	Org1	Twitter	2020-12-01	This #GivingTuesday, #ShareYourWhy & #GiveYourWhy to support the OAC! Why do you support the OAC? Share it with us & tag us by using #ShareYourWhy!	1
56	Org1	Twitter	2020-12-01	This #GivingTuesday, #ShareYourWhy & #GiveYourWhy to support the OAC! Why do you give to the OAC? "Because the OAC is educating & amplifying our voices & making a difference." Why do you support the OAC? Share it with us & tag us by using #ShareYourWhy!	1
57	Org1	Twitter	2020-12-01	This #GivingTuesday, #ShareYourWhy and #GiveYourWhy to support the OAC! share a short video telling us why the OAC is meaningful to you! Use our hashtag: #ShareYourWhy to enter the chance to win some OAC swag!	1
58	Org1	Twitter	2020-12-01	On this #GivingTuesday, we're asking you to make the OAC your charity of choice! If you're as passionate as we are about better #obesity education, improved access to treatment & to #stopweightbias, then we hope you make a tax-deductible donation today!	1
59	Org1	Twitter	2020-11-30	This #CyberMonday, enjoy all the #cyberdeals on Amazon and make sure to select the OAC as your charity of choice through Amazon Smile!	1
60	Org1	Twitter	2020-11-30	#MotivationalMonday Our year-end fundraising campaign starts tomorrow! #ShareYourWhy by telling us why the OAC is meaningful to you & #GiveYourWhy by making a tax-deductible, year-end donation of any amount to support the OAC!	1
61	Org1	Twitter	2020-11-30	Here's a #SundayRead for you! For months, U.S. news headlines have been dominated by politics & elections. We know you might be wondering what these changes mean & what impacts they carry... So, we took some time to break it down during our OAC broadcast: Politics, Policies, and the Current Landscape for Obesity.	1
62	Org1	Twitter	2020-11-29	This holiday season, share a short video telling us why the OAC is meaningful to you! Use our hashtag: #ShareYourWhy to enter the chance to win some OAC swag! Want to do more? #GiveYourWhy! Support the OAC with a tax-deductible, year-end donation	1
63	Org1	Twitter	2020-11-29	Our year-end fundraising campaign starts soon! Starting on #GivingTuesday, you can #ShareYourWhy by telling us why the OAC is meaningful to you & #GiveYourWhy by making a tax-deductible, year-end donation of any amount!	1
64	Org1	Twitter	2020-11-25	Understand that there are powerful biological and environmental forces that trigger us to overeat. You shouldn’t feel inferior if you are struggling with food and weight.	4
65	Org1	Twitter	2020-11-24	The best way to give thanks for your health is to treat yourself with kindness and compassion. Check out these tips to cultivate an attitude of thankfulness. #TuesdayTips	1
66	Org1	Twitter	2020-11-23	Cardiovascular activities help you burn calories, keep your heart and lungs healthy, and relieve stress. If you want to get more active, they are a great place to start!	1
67	Org1	Twitter	2020-11-23	"Try not to judge a book by its cover, because if you do, you may be missing out on some very special and beautiful people."	1
68	Org1	Twitter	2020-11-23	“Psychological evaluation” can often cause pre-bariatric surgery patients to struggle with overwhelming & anxious feelings. First, let’s not look at this as an evaluation, but rather a consultation with a behavioral health professional. #SundayRead	11	bariatric surgery
69	Org1	Twitter	2020-11-22	The Obesity Action Coalition (OAC) would like to acknowledge and thank Livliga® for returning to OAC’s Chairman’s Council as a proud supporter!	1
70	Org1	Twitter	2020-11-21	Did you miss our broadcast on Wednesday? No worries, you can watch it on our Youtube channel, our Facebook Page or Instagram! Click to watch now and comment below to tell us your thoughts!	1
71	Org1	Twitter	2020-11-21	#NationalFamilyCaregiversMonth During November, we take time to recognize and give praise and support to the 78 million people who dedicate their time, often unpaid, to caring for a family member in need.	1
72	Org1	Twitter	2020-11-19	Did you miss our live broadcast yesterday? No worries! You can watch it now! The video is available on our Facebook page, Youtube channel and Instagram! Don’t miss out, watch it now and let us know what you think!	1
73	Org1	Twitter	2020-11-18	One more hour! Get ready, grab a cup of coffee or tea and join us for the second episode of our broadcast through Facebook live! Comment below to let us know where you will be joining us from?	1
74	Org1	Twitter	2020-11-17	#BehindtheScenes Getting ready for tomorrow’s broadcast! Don’t forget to tune-in tomorrow (Wednesday, Nov 18th) at 3:00 PM EST!	1
75	Org1	Twitter	2020-11-16	Join us this Wednesday, November 18th at 3:00 PM EST for the second episode of our broadcast! Share this post to invite your friends and comment below to let us know where you will be watching from!	1
76	Org1	Twitter	2020-11-15	The journey of weight-loss can often be a difficult one with a variety of pitfalls. The Living Well Guide is a FREE resource that aims to help you along your journey with weight and health.	1
77	Org1	Twitter	2020-11-15	Are you ready for our second broadcast? We hope that you will join us next Wednesday, Nov 18th at 3:00 PM EST to talk about Politics, Policies and the Power of Your Voice! Don’t miss out and don’t forget, we have giveaways!	1
78	Org1	Twitter	2020-11-14	Today is #WorldDiabetesDay! Did you know that excess weight & #obesity can increase your risk of developing diabetes, specifically type 2? #NationalDiabetesAwarenessMonth	7	Diabetes
79	Org1	Twitter	2020-11-14	Any fun plans to start your weekend? How about some yoga? #Yoga is an excellent low-impact #exercise that provides incredible #health benefits regardless of your size! This ancient discipline is good for your physical health & your wellbeing as a whole.	1
80	Org1	Twitter	2020-11-13	There's a lot going on in the world right now, but despite all the challenges we can always find something or someone to be thankful for! As we get ready for our next broadcast, we want to ask you, what are you thankful for? Comment below to let us know!	1
81	Org1	Twitter	2020-11-13	Check the OAC's Image Gallery! The purpose of this FREE image gallery is to help refocus the perception of obesity, and change the perception of individuals affected by this chronic disease.	3
82	Org1	Twitter	2020-11-13	You might be craving a pumpkin spice latte or some warm pumpkin bread, but don’t overlook the abundance of fall vegetables in season! Fall in love with yummy, healthy, in-season fall vegetables!	1
83	Org1	Twitter	2020-11-13	Mark your calendars! Join the OAC on Wednesday, Nov. 18th at 3 PM EST via Facebook Live for our 2nd broadcast: Politics, Policies, and the Power of Your Voice!	1
84	Org1	Twitter	2020-11-13	November is #NationalDiabetesAwarenessMonth – and just like obesity, the topic of diabetes needs a shift in how we talk about it.	1
85	Org1	Twitter	2020-11-12	When life gets crazy, keeping a semblance of balance can feel impossible. It can also be increasingly difficult to stay grounded when it feels like you are being pulled in every direction. 5 tips for keeping the balance when life gets crazy!	1
86	Org1	Twitter	2020-11-12	In the fight against COVID-19, your wellbeing is a priority. As always, you can continue to count on the OAC offer meaningful educational resources, share tips from health experts, connect you to others & much more!	1
87	Org1	Twitter	2020-11-12	In honor of #NationalDiabetesAwarenessMonth, we will be sharing OAC resources & tools to help you learn more about diabetes & the connection between #diabetes & #obesity. Did you know that the OAC offers a brochure series dedicated to diabetes and obesity?	7	Diabetes
88	Org1	Twitter	2020-11-11	A qualified healthcare professional can be of great value on your weight management journey by offering evidence-based information, individualized treatment approaches, treatment options, resources, tools and more.	1
89	Org1	Twitter	2020-11-11	November is Diabetes Awareness Month. Did you know that excess weight and obesity can increase your risk of developing Type 2 Diabetes? #NationalDiabetesAwarenessMonth	7	Diabetes
90	Org1	Twitter	2020-11-11	We all know that in today’s culture, weight is often highly criticized. Sometimes, it can feel like our weight is the first thing someone notices or points out about us. How do you deal with negative comments about weight?	12
91	Org1	Twitter	2020-11-10	November is commonly a time when our health habits start to slip and it’s harder to stay on track. With all this in mind, there are a few tips and tricks you can use to vary your routine and bring some focus and clarity into your life. 5 hacks for a healthy November!	1
92	Org1	Twitter	2020-11-10	The most important reason why your weight matters is because of your health. Being impacted by excess weight is a health concern and it can affect you in many ways.	1
93	Org1	Twitter	2020-11-09	Your support fuels our mission. When you participate, advocate and donate, you help us to create a better world for the more than 93 million Americans affected by the disease of obesity.	1
94	Org1	Twitter	2020-11-06	Throughout this pandemic, one of the biggest health topics to emerge is Vitamin D. Can more Vitamin D help fight COVID-19? Is it especially helpful to people with obesity?	1
95	Org1	Twitter	2020-11-06	While we know that nearly 100 million Americans are affected by #obesity, the reasons why do not look the same for everyone. And to that note, standard ways of preventing and treating obesity should not be the same across the board, either.	1
96	Org1	Twitter	2020-11-05	Today, the power of online messaging has never been more valuable – so here at OAC, we wanted to step further into the virtual world to connect with you in a deeper and more meaningful way through our monthly broadcast!	1
97	Org1	Twitter	2020-11-04	New research presented at #OW2020 is giving us something to be grateful for as we head into the season of giving thanks. It suggests that Americans are beginning to understand #obesity more as a medical condition and less as a personal fault.	3	medical condition (disease)
98	Org1	Twitter	2020-11-04	At #OW2020, new research suggests that Americans are beginning to understand #obesity more as a medical condition and less as a personal fault.	3	medical condition (disease)
99	Org1	Twitter	2020-11-03	Obesity is not only a complex disease but also a complex topic. Everybody thinks they know all about it. But in truth, the brightest minds who study obesity know how little we actually know. #OW2020	3	complex disease
100	Org1	Twitter	2020-11-02	Join the OAC from November 2-6 during #OW2020, as we represent the patient voice and a handful of our leadership will take part in virtual sessions about weight stigma, navigating treatment options and more.	1
101	Org1	Twitter	2020-10-29	Did you miss our live broadcast yesterday? No worries! You can watch it now! The video is available on our Facebook page, Youtube channel and Instagram! Don’t miss out, watch it now and let us know what you think!	1
102	Org1	Twitter	2020-10-28	Thank you so much for joining us today for our first broadcast! If you couldn’t join us during the live broadcast, you can access the recording on our Facebook page, Youtube channel and Instagram TV! See you next month! In the meantime, here’s a #behindthescenes video!	1
103	Org1	Twitter	2020-10-28	Currently working on some last minute touches around the studio! Can't wait to stream live from our headquarters at 3:00 PM EST! Make sure to comment below and let us know what you think about our setting!	1
104	Org1	Twitter	2020-10-28	Our broadcast starts in three hours!! It will be available through our Facebook page, so make sure to follow us! Are you joining us? Comment below to say hi and tell us where you will be watching from!	1
105	Org1	Twitter	2020-10-28	The day is finally here! Join us today at 3:00 PM EST for our first broadcast, today's topic is "Challenging the Narrative about Obesity - Dispelling Common Myths about Obesity."	1
106	Org1	Twitter	2020-10-28	Tomorrow during our broadcast (live on Facebook at 3:00 PM EST) we will be dispelling common myths and misconceptions around obesity. Before that, we want to hear your thoughts on some of these myths! Comment below to let us know what you think!	1
107	Org1	Twitter	2020-10-27	Tomorrow during our broadcast (live on Facebook at 3:00 PM EST) we will be dispelling common myths and misconceptions around obesity. Before that, we want to hear your thoughts on some of these myths! Comment below to let us know what you think!	1
108	Org1	Twitter	2020-10-27	Join us tonight, Tuesday, 10/27/2020 at 7 pm EST, during the “Obesity, Healthy Lifestyles, and Black Women” webinar hosted by The Black Women’s Health Imperative.	1
109	Org1	Twitter	2020-10-27	Tomorrow, October 28th at 3: 00 PM EST, during our first ever broadcast, we will be dispelling some common myths about obesity. What are some of the most common ones the you have heard? Comment below to let us know!	1
110	Org1	Twitter	2020-10-27	Using the power behind our newly-created video studio, OAC will be broadcasting on Facebook LIVE TOMORROW October 28th at 3:00 PM EST, from our headquarters in Tampa, FL, for our first episode: Challenging the Narrative - Dispelling Common Myths about Obesity.	1
111	Org1	Twitter	2020-10-26	Join our President & CEO ('@JNadglowskiOAC) tomorrow, Tuesday, 10/27/2020 at 7 pm EST, during the “Obesity, Healthy Lifestyles, and Black Women” webinar hosted by The Black Women’s Health Imperative. Click the link to learn more!	1
112	Org1	Twitter	2020-10-26	Are you ready? It's almost time! Save the date, tune in on October 28th at 3:00 PM EST and check out our newest project! We are so excited to finally share it with all of you!	1
113	Org1	Twitter	2020-10-23	Mark your calendars and join us next Wednesday, October 28th at 3:00 PM EST! We will be unveiling our latest project and we are so excited to share it with you! Make sure to tune in, share this post and comment below to invite your friends!	1
114	Org1	Twitter	2020-10-22	Have you ever wondered why you weigh what you do? Is your weight inherited from your parents? Is it because you don’t like to exercise or that you eat too many calories? Is it due to the stress of your job?	4	genetic, no exercise, diet, stress
115	Org1	Twitter	2020-10-21	Today is the launch of the '@ECPObesity #LivingWithObesity campaign with a call to action for People First language. The objectives of this campaign are to educate, drive awareness & share the patient perspective of living with #obesity.	1
116	Org1	Twitter	2020-10-20	"We talk a lot about self-love but many times we think of that in terms of body image. Self-love is also knowing yourself enough to know when something isn’t right and working to get to the bottom of it." #BreastCancerAwarenessMonth	1
117	Org1	Twitter	2020-10-17	You might be craving a pumpkin spice latte or some warm pumpkin bread, but don’t overlook the abundance of fall vegetables in season!	1
118	Org1	Twitter	2020-10-16	If you are struggling with obesity and/or other weight-related conditions, you deserve healthcare that is professional, respectful, comprehensive and effective. You shouldn’t have to settle when it comes to your healthcare.	1
119	Org1	Twitter	2020-10-15	#Obesity should be treated just like any other disease in the media. It is our hope that the #media will adhere to these guidelines when covering the topic of #obesity and those affected by it. Help us spread the word by re-sharing this post!	3	disease
120	Org1	Twitter	2020-10-14	Support OAC on Amazon Prime Day! AmazonSmile is a simple and automatic way for you to support the OAC every time you shop.	1
121	Org1	Twitter	2020-10-14	You may hear people talk about choosing a “treatment” for their obesity. This simply means deciding which weight-loss method is right for you.	1
122	Org1	Twitter	2020-10-13	Whether you share OAC’s educational resources in your local community, make a charitable donation, repost our social media content or encourage others to support the OAC, YOU play a role in making a real difference!	1
123	Org1	Twitter	2020-10-13	When you're shopping #AmazonPrimeDay deals on October 13th and 14th, remember to make OAC the charity of your choice on #AmazonSmile!	1
124	Org1	Twitter	2020-10-12	4 out of 10 Americans live with #obesity. If you or someone you know does, no one's alone. We’re all in this together & help is out there. So, take extra care, check in with a #healthcare provider & find out what you can do to protect your health.	1
125	Org1	Twitter	2020-10-12	Are you familiar with People-First language? People-First Language is not something new; however, it is new to the #obesity community. For years, other chronic diseases have adopted People-First Language & encouraged its usage in all reporting.	3	chronic
126	Org1	Twitter	2020-10-11	While walking may not always burn as many calories as higher-intensity workouts, it carries low risk and is a great way to get active if you struggle with physical activity.	1
127	Org1	Twitter	2020-10-11	We hope that you enjoyed the different resources that we shared throughout the day in recognition of #WorldMentalHealthDay! Your mental health is important every day and at every stage of your life. If you or a loved one are struggling please seek help!	1
128	Org1	Twitter	2020-10-11	Effective stress management helps you break the hold stress has on your life, so you can be happier, healthier, and more productive. What are some of your stress managing tips?	1
129	Org1	Twitter	2020-10-11	When it comes to #mentalhealth, a particular way of eating called the Mediterranean Diet has been linked to mental & brain health. The goal of this diet is not weight-loss, but rather eating nutrient-rich foods that benefit mental & heart health.	1
130	Org1	Twitter	2020-10-11	Stress eating is a common response to periods of heightened stress and uncertainty. As we continue to navigate the current Coronavirus pandemic, many factors may be triggering you or a loved one to stress eat in response.	4	stress eating
131	Org1	Twitter	2020-10-10	Exercise plays an important role in managing our overall #health & #wellness and it has significant impact on our #mentalhealth. Good mental health can translate to successful #weightmanagement if we cultivate it & maintain it.	1
132	Org1	Twitter	2020-10-10	Research about the correlations between #obesity and #mentalhealth seem to have a direct focus on which condition came first – similar to the old chicken or the egg dispute. What do you think?	4	psychological
133	Org1	Twitter	2020-10-10	Your mental health toolbox is a set of activities & resources that support your #mentalhealth. Earlier this year, Dr. Rachel Goldman shared some important tips that everyone should include in their mental health toolbox!	1
134	Org1	Twitter	2020-10-10	Today is #WorldMentalHealthDay, we are recognizing this important awareness day by sharing some of our #mentalhealth resources with you! We also want to give you the space to share your mental health tips with us, comment below to share them with us!	1
135	Org1	Twitter	2020-10-09	Black hospitalized patients have a 14% higher rate of malnutrition than white patients. Learn how to intervene against malnutrition during Malnutrition Awareness Week, Oct. 5-9, 2020.	1
136	Org1	Twitter	2020-10-09	The Living Well Guide is a FREE OAC resource that aims to help along your journey with weight & health. Through this guide, you will learn how to make healthy lifestyle choices, manage your weight & how to be successful long term.	1
137	Org1	Twitter	2020-10-09	Emergency department patients with malnutrition are 17% more likely to be hospitalized. Learn how to intervene during Malnutrition Awareness Week 2020	1
138	Org1	Twitter	2020-10-08	Every 60 seconds, 11 hospitalized patients go undiagnosed with malnutrition. Learn how to intervene during Malnutrition Awareness Week, Oct. 5-9, 2020.	1
139	Org1	Twitter	2020-10-08	Being part of our monthly giving program is an easy and convenient way to make a real impact on lives of the more than 93 million Americans affected by obesity.	1
140	Org1	Twitter	2020-10-06	Malnourished hospitalized patients are associated with longer stays, higher medical costs, and increased mortality. Learn how to intervene during #MAW2020!	1
141	Org1	Twitter	2020-10-05	Malnutrition Awareness Week starts today! The OAC is a proud ambassador of #MAW2020 and we want to invite you to learn more about it! Join us this week to learn more about this important awareness week and help us spread the word!	1
142	Org1	Twitter	2020-10-02	“Despite this continuing rise in obesity and its consequences, the United States has failed to create a coordinated and comprehensive response to the obesity epidemic.”	1
143	Org1	Twitter	2020-10-01	Perhaps thanks to COVID-19, we’re starting to look more closely at the broader topics of obesity and healthcare as a whole. The data that has come out of this pandemic is clear: in any population, obesity makes the health risks of COVID-19 a lot greater.	7	COVID-19
144	Org1	Twitter	2020-09-29	This week (9/28 - 10/2) is National Eating Disorders Association (NEDA)’s Weight Stigma Awareness Week (#WSAW2020). Together, we can eliminate weight stigma and discrimination.	12
145	Org1	Twitter	2020-09-29	We are excited to share a #behindthescenes of something exciting that we are working on to #StopWeightBias..... Can't wait to share more details with everyone soon!	12
146	Org1	Twitter	2020-09-28	Weight stigma is a pervasive issue in our society, & we can’t have meaningful conversations about #obesity without addressing it. That’s why the OAC is recognizing the 2nd Annual , #WeightStigmaAwarenessWeek #WSAW2020 (Sept. 28 – Oct. 5)	12
147	Org1	Twitter	2020-09-25	News about #COVID19 & #obesity continue to dominate headlines as the link between #obesity & #COVID19 grows stronger. It’s crucial that we hear the voice of individuals living with obesity who are also trying to make sense of this #pandemic	7	COVID-19
148	Org1	Twitter	2020-09-23	Addressing #obesity in adults is already tough, but it can be even tougher to address obesity in our children. What are its causes? What are its health impacts?	1
149	Org1	Twitter	2020-09-20	The OAC & Medtronic are partnering together in a survey to help us learn more about the experiences of current & future bariatric surgery patients and you can help! Click the link to participate now!	11	bariatric surgery
150	Org1	Twitter	2020-09-19	September is #NationalCholesterolEducationMonth. Did you know that excess weight and obesity can increase your cholesterol?	7	Cholesterol increase
151	Org1	Twitter	2020-09-18	Have you had bariatric surgery or are you considering having bariatric surgery in the future? Your insight and experiences are wanted!	11	bariatric surgery
152	Org1	Twitter	2020-09-17	The OAC is in the midst of a big project to reduce #weightbias & #stigma. Research to mark our starting point has to measure how we’re feeling about obesity and it turns out that the words people use can tell us a lot.	1
153	Org1	Twitter	2020-09-16	Next week is a crucial week. In a dash to get critical #obesity legislation passed in Congress, we’re making virtual visits to Capitol Hill, where we will be urging representatives in Washington, DC, to support the Treat and Reduce Obesity Act #TROA	1
154	Org1	Twitter	2020-09-15	"Living with obesity as an adult is hard. Living with it as a child can be so much harder." #NationalChildhoodObesityAwarenessMonth	1
155	Org1	Twitter	2020-09-15	The OAC’s Sponsored Membership Program is a unique way that you can keep your patients engaged in their care by giving them the gift of OAC Premium Access Membership at a discounted rate.	1
156	Org1	Twitter	2020-09-10	In the coming weeks, OAC will meet virtually with legislators on Capitol Hill to ramp up momentum on the Treat and Reduce Obesity Act, commonly known as #TROA.	1
157	Org1	Twitter	2020-09-05	Walking is an excellent way to exercise, but as with all activity, you have to ease yourself into it. Make time to progress slowly, and don’t forget to incorporate specific fitness goals and motivations so you’re moving with a purpose.	1
158	Org1	Twitter	2020-09-04	The OAC has just debuted a NEW online video series about the basics of OAC advocacy. We hope that this new advocacy video series will help you find your place in the OAC’s fight to make the world a better place for individuals affected by #obesity.	1
159	Org3	Facebook	2021-01-31	“That’s the idea behind OCEANS: that teens can come together in a completely judgement free space designed specifically for them, to talk about obesity, health, and all the challenges in our individual journeys.” @OCEANSlifestyle	1
160	Org3	Facebook	2021-01-31	This week, we are shining our #SaturdaySTOPSpotlight on the founder and president of @OCEANSlifestyle Faith Newsome! Faith was recently featured in our January issue of the STOP newsletter (http://mailchi.mp/gwu/jan21). Read about Faith’s story at: http://oceanslifestyles.com	1
161	Org3	Facebook	2021-01-29	JUST IN! Don’t miss the January issue of our newsletter authored by @OCEANSlifestyle president, Faith Newsome! This month’s topic: adolescent #obesity. http://mailchi.mp/gwu/jan21	1
162	Org3	Facebook	2021-01-29	#FastFact: Over half of adolescents seeking surgical interventions for #obesity were denied insurance coverage for the procedure because they were under 18. Learn more with our brand new #FastFact sheet on adolescent obesity: https://stop.publichealth.gwu.edu/sites/stop.publichealth.gwu.edu/files/STOP%20Fact%20Sheet_Adolescent%20Obesity.pdf	11	surgical intervention
163	Org3	Facebook	2021-01-29	NEW at http://stop.publichealth.gwu.edu/COVIDResources: commentary, #FastFact sheets, and newsletter editions on #COVID19 to help highlight the connections between systemic inequities, chronic health disparities and the COVID-19 pandemic. Check it out!	1
164	Org3	Facebook	2021-01-02	In 2019, @CouncilofDC proposed the Continuing Nutrition Education Amendment Act requiring 2 CE credits of evidence-based instruction on nutrition to improve #obesity prevention and treatment efforts. Read the full #ObesityCareCompetency case study at: https://obesitycompetencies.gwu.edu/wp-content/uploads/DC.pdf	1
165	Org3	Facebook	2021-01-28	Professions that would benefit from visiting http://obesitycompetencies.gwu.edu to enhance their #obesitycarecompetencies: • Pharmacists; • Nurses; • Nutritianists; • Researchers; • Social workers; • & more!	1
166	Org3	Facebook	2021-01-27	As children develop and mature at varying rates throughout childhood, generalizing advice is not advised. That is why we designed the Weigh In Guide specifically for parents with children who are 7-11 yrs old. Access the guide + additional resources at: http://WeighInGuide.com	1
167	Org3	Facebook	2021-01-27	Barriers reported by health care providers from discussing weight with their patients: • Lack of time; • Insufficient reimbursement; • Lack of training, tools, and confidence; • and more.	1
168	Org3	Facebook	2021-01-27	The Why Weight guide and website can help health care providers overcome these barriers to hold effective conversations about #weight and #health with their patients. For more, visit: http://whyweightguide.org	1
169	Org3	Facebook	2021-01-27	At http://go.gwu.edu/weightcantwait, we offer a curated resource list with guidelines, image galleries, and resources to share with patients to support the management of #obesity in the primary care setting.	1
170	Org3	Facebook	2021-01-05	#FastFact: The fragmented U.S. healthcare system makes it difficult to know what care is available and how much it costs. https://stop.publichealth.gwu.edu/sites/stop.publichealth.gwu.edu/files/Obesity%20Care%20Coverage.pdf	1
171	Org3	Facebook	2021-01-05	Want to learn more about #obesity care coverage? Then visit http://stop.publichealth.gwu.edu/policy and explore our interactive map offering a state-by-state analysis of #obesity coverage in state employee and medicaid plans.	1
172	Org3	Facebook	2021-01-22	NEW at http://stop.publichealth.gwu.edu/COVIDResources: commentary, #FastFact sheets, and newsletter editions on #COVID19 to help highlight the connections between systemic inequities, chronic health disparities and the COVID-19 pandemic. Check it out!	1
173	Org3	Facebook	2021-01-22	Scenario #4: Your racial/ethnic heritage traditionally finds having extra weight as attractive or something to be admired, rather than a health concern. When your child comes home having been told by classmates & teachers that he is “fat,” he is confused & hurt.	12
174	Org3	Facebook	2021-01-22	On http://WeighInGuide.com, we share realistic scenarios to help parents & caregivers prepare for conversations about #weight and #health with their children. For tips on Scenario No. 4, visit: http://weighinguide.com/situation/four/index.html	1
175	Org3	Facebook	2021-01-22	Educators from @UWDentalSchool are addressing #obesity in the predoctoral oral health curriculum. In the future, some of the educational content will be available to students at other institutions. Read the full #ObesityCareCompetency case study at: https://obesitycompetencies.gwu.edu/wp-content/uploads/UW.pdf	1
176	Org3	Facebook	2021-01-22	#ObesityCareCompetency #8: Implement a range of accommodations and safety measures specific to people living with #obesity. Learn more by visiting: http://obesitycompetencies.gwu.edu	1
177	Org3	Facebook	2021-01-20	For National #DayofRacialHealing, it is especially important to acknowledge that Black and Hispanic children are disproportionately burdened by #COVID19 and #obesity. Info Source: @CDCgov	5	race
178	Org3	Facebook	2021-01-20	At http://stop.publichealth.gwu.edu, you can find our commentaries, #FastFact sheets, and newsletters that advocate for #equity by spreading awareness about #obesity. #HowWeHeal	1
179	Org3	Facebook	2021-01-20	Health care providers should visit http://whyweightguide.com for the comprehensive guide, training videos, and further readings on holding effective conversations about weight and health with your patients.	1
180	Org3	Facebook	2021-01-18	retweet: Weight Can’t Wait: A Guide for the Management of #Obesity in the #PrimaryCare Setting via http://ow.ly/BkpN50Ch5Xd	1
181	Org3	Facebook	2021-01-19	Effective obesity management does not end after a patient exits the building. Providers: the #WeightCantWait guide offers practical advice on how to follow-up with patients after the clinical encounter. http://go.gwu.edu/weightcantwait	1
182	Org3	Facebook	2021-01-19	Whether it is conscious or unconscious, weight bias occurs in every area of life including employment, healthcare, education and someone’s personal life. It’s time to stop it! #bepartofthesolution #stopweightbias http://StopWeightBias.com @StopWeightBias	12
183	Org3	Facebook	2021-01-19	– and you can learn more with our #FastFact sheet on Weight Bias and Stigma: https://stop.publichealth.gwu.edu/sites/stop.publichealth.gwu.edu/files/Weight%20Bias%20and%20Stigma.pdf Weight Bias and Stigma.png	12
184	Org3	Facebook	2021-01-17	#FastFact: A person’s body weight can affect the accessibility of certain cancer treatments like radiographic imaging, chemotherapy, radiation therapy, and surgery and the outcomes of those treatments. Learn more w/ our NEW #Obesity and Cancer Fact Sheet: https://stop.publichealth.gwu.edu/sites/stop.publichealth.gwu.edu/files/STOP%20Fact%20Sheet_%20Obesity%20and%20Cancer.pdf	7	cancer
185	Org3	Facebook	2021-01-16	This week, we’re shining our #SaturdaySTOPspotlight on @TheAACE ! In December, @BuzzFeed shared their resource on 11 tips for spotting hypoglycemia in patients. https://buzzfeed.com/theaace/why-hypoglycemia-is-way-worse-than-being-hangry	1
186	Org3	Facebook	2021-01-15	NEW at http://stop.publichealth.gwu.edu/COVIDResources: commentary, #FastFact sheets, and newsletter editions on #COVID19 to help highlight the connections between systemic inequities, chronic health disparities and the COVID-19 pandemic. Check it out!	1
187	Org3	Facebook	2021-01-15	At @USCChanOSOT , educators developed the Lifestyle Redesign curriculum to better prepare future and current professionals to design and deliver occupational therapy interventions for clients with #obesity. Read the full case study at: https://obesitycompetencies.gwu.edu/wp-content/uploads/1_Case-Study_USC-rev.3-1.pdf	11	occupational therapy, healthcare providers
188	Org3	Facebook	2021-01-15	Are you interested in designing a program to enhance the #ObesityCareCompetencies of providers in training? Then visit http://obesitycompetencies.gwu.edu for case studies and helpful resources!	1
189	Org3	Facebook	2021-01-13	“You know your child best and that makes you the most valuable asset in communicating with your child about weight.” At http://WeighInGuide.com, we offer a guide and resources for parents and caregivers discussing #weight and #health with their children.	1
190	Org3	Facebook	2021-01-12	In this video, our medical director @scottkahan introduces the Why Weight discussion tool and provides an overview of productive ways for health care providers to discuss the topic of #weight & #health w/ patients. For more, visit http://whyweightguide.org	1
191	Org3	Facebook	2021-01-11	The conversation about #obesity doesn’t end when your patient exits the building. In our new #WeightCantWait guide, we offer providers guidance on proceeding with #obesity treatment after the clinical encounter. http://go.gwu.edu/wcwguide	1
192	Org3	Facebook	2021-01-11	The conversation about #obesity doesn’t end when your patient exits the building. In our new #WeightCantWait guide, we offer providers guidance on proceeding with #obesity treatment after the clinical encounter. http://go.gwu.edu/wcwguide	1
193	Org3	Facebook	2021-01-10	Effective strategies to prevent #obesity at the community-level have shown to: • Increase healthy options • Reduce deterrents • Build community capacity • Improve social and economic resources. Learn more in our Dr. Dietz’s @AmerAcadPeds piece at: http://go.gwu.edu/newapproach	9	Prevention	9
194	Org3	Facebook	2021-01-09	Check out this article co-written by our Dr. Dietz & published in @NEJM discussing our progress and future prospects in addressing population-wide #obesity.	1
195	Org3	Facebook	2021-01-08	As children develop & mature at varying rates throughout childhood, generalizing advice is not advised. That is why we designed the Weigh In Guide specifically for parents with children who are 7-11 yrs old. Access the guide plus additional resources at: http://WeighInGuide.com	1
196	Org3	Facebook	2021-01-07	We are excited to be a part of developing the NEW #WeightCantWait guide with @STOPObesity ! The guide offers short, accessible, and practical information to support providers in delivering effective #obesity management. http://go.gwu.edu/weightcantwait	1
197	Org3	Facebook	2021-01-06	Check out this article co-written by our Dr. Dietz & published in @NEJM discussing our progress and future prospects in addressing population-wide #obesity.	1
198	Org3	Facebook	2021-01-06	#ObesityCareCompetency No. 1: Demonstrate a working knowledge of #obesity as a disease. Health professionals across the field should visit http://obesitycompetencies.gwu.edu to learn why the 10 Competencies can enhance their ability to deliver effective obesity care.	3	Demonstrate a working knowledge of #obesity as a disease.
199	Org3	Facebook	2021-01-06	Are you a health care provider who wishes you had a short, accessible, and practical guide on effective #obesity management?	1
200	Org3	Facebook	2021-01-06	Visit http://go.gwu.edu/weightcantwait and read the #WeightCantWait guide we developed with 11 leading health professional organizations: @ObesityMedicine @ASMBS @TheAACE @AANP_News @theAMGA @AAPAorg @ACPM_HQ @TheEndoSociety @OMAsocial @ObesityAction	1
201	Org3	Facebook	2021-01-06	. @TouroCalifornia designed the Fundamentals for an Osteopathic Obesity Designed Study (FOODS) curriculum which resulted in an improvement in students’ attitudes toward and knowledge of #obesity. Learn more w/ our #ObesityCareCompetency case study! https://obesitycompetencies.gwu.edu/wp-content/uploads/TUCOM.pdf	1
202	Org3	Facebook	2021-01-04	Scenario: A parent or teacher who doesn’t know you or your family well questions you about whether your child who has #obesity is allowed to have a birthday cupcake or participate in an athletic activity. What do you say?	1
203	Org3	Facebook	2021-01-04	At http://WeighInGuide.com, we share realistic scenarios to help parents & caregivers prepare for conversations about #weight and #health with their children. For tips on Scenario No. 7, visit: http://weighinguide.com/situation/five/index.html	1
204	Org3	Facebook	2021-01-04	#FastFact: A person’s body weight can affect the accessibility of certain cancer treatments like radiographic imaging, chemotherapy, radiation therapy, and surgery and the outcomes of those treatments. Learn more w/ our NEW #Obesity and Cancer Fact Sheet: https://stop.publichealth.gwu.edu/sites/stop.publichealth.gwu.edu/files/STOP%20Fact%20Sheet_%20Obesity%20and%20Cancer.pdf	7	affected accessibility and outcomes of certain cancer treatments like radiographic imaging, chemotherapy, radiation therapy, and surgery
205	Org3	Facebook	2021-01-04	Want to learn more about #Obesity and cancer? Read this month's edition of our Letter from the Director! http://mailchi.mp/gwu/dec28	1
206	Org3	Facebook	2021-01-03	Sabe que ofrecemos nuestro <<Weigh In Guide>> en Español: Hablar Con Sus Hijos Sobre el Peso y la Salud Visita http://weighinguide.com por más recursos.	1
207	Org3	Facebook	2021-01-02	Health care providers: At http://go.gwu.edu/weightcantwait, we offer a curated resource list with guidelines, image galleries, and resources to share with patients to support the management of #obesity in the primary care setting.	1
208	Org3	Facebook	2020-12-31	Health care providers should visit http://whyweightguide.com for the comprehensive guide, training videos, and further readings on holding effective conversations about weight and health with your patients.	1
209	Org3	Facebook	2020-12-30	This @AmJPrevMed article calls upon @USDA to provide clear guidance on preventing food and beverage ads from running on educational websites and apps used for remote learning.	1
210	Org3	Facebook	2020-12-30	Our Dr. Dietz makes public policy recs to reduce #sugarydrink consumption in children & adolescents in this @AmerAcadPeds piece: http://go.gwu.edu/aapsugar Rec #2: “The federal & state governments should support efforts to decrease sugary drink marketing to children & adolescents.”	9	reduce sugary drink consumption
211	Org3	Facebook	2020-12-02	At our very own @GWSMHS , Educators developed an immersive, 3-day experiential learning summit to teach medical students about the social cultural influencers of #obesity and what clinicians can do to mitigate them. Read more about it: https://obesitycompetencies.gwu.edu/wp-content/uploads/GWU.pdf	5	social cultural influences
212	Org3	Facebook	2020-12-28	At http://obesitycompetencies.gwu.edu, we offer 10 case studies that showcase real-world #ObesityCareCompentency integration strategies that might inspire leaders in each profession to prioritize #obesity education. Check it out!	1
213	Org3	Facebook	2020-12-28	#FastFact: A person’s body weight can affect the accessibility of certain cancer treatments like radiographic imaging, chemotherapy, radiation therapy, and surgery and the outcomes of those treatments. Learn more w/ our NEW #Obesity and Cancer Fact Sheet: https://stop.publichealth.gwu.edu/sites/stop.publichealth.gwu.edu/files/STOP%20Fact%20Sheet_%20Obesity%20and%20Cancer.pdf	7	affected accessibility and outcomes of certain cancer treatments like radiographic imaging, chemotherapy, radiation therapy, and surgery
214	Org3	Facebook	2020-12-27	This weekend, we’re highling @ASMBS in our #SaturdaySTOPSpotlight! On January 29th-30th, they’re hosting RE-VISION: The Future of ASMBS Weekend Meeting. Join them to discuss the future of metabolic and bariatric surgery. #ASMBSREVISION http://ow.ly/fPbi50CG8oV	11	bariatric surgery
215	Org3	Facebook	2020-12-27	At http://ObesityCompetencies.gwu.edu, you can a wide range of resources like case studies, videos, articles, webinars, and more to strengthen your core competencies and deliver effective #obesity care!	1
216	Org3	Facebook	2020-12-27	Check out this article co-written by our Dr. Dietz & published in @NEJM discussing our progress and future prospects in addressing population-wide #obesity.	1
217	Org3	Facebook	2020-12-23	In this http://WhyWeightGuide.org video, our medical director @scottkahan acts out clear examples of what NOT to do when discussing #weight and #health with patients including: No entry sign blaming/shaming No entry sign lecturing/talking down No entry sign using authoritarian commands	11
218	Org3	Facebook	2020-12-22	Providers: refer parents of children living w/ obesity to our Weigh -In site for practical advice on discussing weight & health w/ children and scenario-based solutions: http://weighinguide.com	1
219	Org3	Facebook	2020-12-21	Effective obesity management does not end after a patient exits the building. Providers: the #WeightCantWait guide offers practical advice on how to follow-up with patients after the clinical encounter. http://go.gwu.edu/weightcantwait	1
220	Org3	Facebook	2020-12-21	In the Fostering Equity guide, we discuss how housing policy and practices produces community outcomes. Learn more with this infographic and then visit http://go.gwu.edu/fosteringequity	1
221	Org3	Facebook	2020-12-18	#FastFact: did you know that the most-cited reason that those living with #obesity gave for not seeking medical help was perceived personal responsibility for their weight? Learn more with our fact sheet on Weight Bias and Stigma: http://stop.publichealth.gwu.edu/sites/stop.publichealth.gwu.edu/files/Weight%20Bias%20and%20Stigma.pdf	12
222	Org3	Facebook	2020-12-17	#DC’s largest pediatric residency program, developed a home visitation curriculum to improve residents’ understanding of the social determinants of health and how they relate to obesity. Read more with our #ObesityCareCompetency case study! https://obesitycompetencies.gwu.edu/wp-content/uploads/CNHS.pdf	5	social determinants of health
223	Org3	Facebook	2020-12-17	At http://WeighInGuide.com, we share realistic scenarios to help parents & caregivers prepare for conversations about #weight and #health with their children. For tips on Scenario No. 5, visit: http://weighinguide.com/situation/five/index.html	1
224	Org3	Facebook	2020-12-17	Calling all ABOM diplomates (and future diplomates)! Don't miss Weight Can't Wait: A Guide For the Management of Obesity in the Primary Care Setting from ABOM partner @STOPObesity . Find the short and practical guide on STOP’s website: https://bit.ly/3gV9fyC	1
225	Org3	Facebook	2020-12-17	The U.S. adult #obesity rate has surpassed 40%. To help address this important issue @STOPobesity has released the NEW #WeightCantWait guide to provide short, accessible and practical information on effective #obesity management. http://go.gwu.edu/weightcantweight	1
226	Org3	Facebook	2020-12-15	A Key consideration for fostering effective communication about #weight and #health is the impact of trauma and need for trauma-informed care. Learn why by reading our guide at http://whyweightguide.org	1
227	Org3	Facebook	2020-12-14	The conversation about #obesity doesn’t end when your patient exits the building. In our NEW #WeightCantWait guide, we offer providers guidance on proceeding with #obesity treatment after the clinical encounter. http://go.gwu.edu/wcwguide	1
228	Org3	Facebook	2020-12-13	The Pre-Encounter section of the #WeightCantWait guide suggests that providers: •Ask patients to fill out a pre-visit questionnaire •Gather information •Weigh the patient with permission •Use BMI & other metrics to design care Learn more by visiting http://go.gwu.edu/weightcantwait	1
229	Org3	Facebook	2020-12-13	This week, we’re shining our #SaturdaySTOPSpotlight on @TheEndoSociety ! On March 20-21, they’re hosting Endo 2021! Learn more about the event at: http://bit.ly/3eSp1co	1
230	Org3	Facebook	2020-12-11	If the topic of creating a more fair food system interests you, you should check out this #FastFact sheet from @STOPobesity on #COVID19, Food Systems, and #Obesity! https://stop.publichealth.gwu.edu/sites/stop.publichealth.gwu.edu/files/COVID-19%2C%20Food%20Systems%2C%20and%20Obesity.pdf	1
231	Org3	Facebook	2020-12-11	Proud of our faculty and @VillanovaCOPE colleagues who pioneered this #weightsensitivity program Clapping hands sign	1
232	Org3	Facebook	2020-12-11	At http://obesitycompetencies.gwu.edu, we offer 10 case studies that showcase real-world #ObesityCareCompetency integration strategies to inspire leaders across health professions.	1
233	Org3	Facebook	2020-12-11	In this #ObesityCareCompetency case study, read about the 14-week sensitivity training program at @VUNursing designed to reduce weight bias among nursing students. Access the full case study at: https://obesitycompetencies.gwu.edu/wp-content/uploads/VU.pdf	12
234	Org3	Facebook	2020-12-09	Did you know that the NEW #WeightCantWait guide offers a curated resources list with guidelines, resources to share with patients, and image galleries? Providers can add this to their toolbox for delivering effective #obesity care!	1
235	Org3	Facebook	2020-12-08	This NEW article co-written by our Dr. Dietz & published in @NEJM discusses our progress and future prospects in addressing population-wide #obesity. Check it out!	1
236	Org3	Facebook	2020-12-07	December is #FoodSafetyMonth! According to @CDCEnvironment , environmental assessments are important to outbreak investigations.	1
237	Org3	Facebook	2020-12-07	Investigating the safety conditions of our food system is important for protecting its workers who were disproportionately affected by #COVID19. Learn more with our #FastFact Sheet on COVID-19 and #Obesity https://stop.publichealth.gwu.edu/sites/stop.publichealth.gwu.edu/files/COVID-19%2C%20Food%20Systems%2C%20and%20Obesity.pdf	1
238	Org3	Facebook	2020-12-06	Listen to our director @wendyruns speak about the #PairofACEs, #equity, #COVID19, and more with interviewer @janehmul in this "How to talk policy and influence people" Law and Justice series.	1
239	Org3	Facebook	2020-12-05	For this week’s #SaturdaySTOPSpotlight, we're highlighting @SCOPEobesity ’s upcoming #SCOPESchoolGlobal on Dec. 8-9! This virtual course will cover the global prevalence of #childhoodobesity as well as strategies for prevention. For more info, visit: https://worldobesity.org/training-and-events/events/scope-school-global-childhood-obesity-a-window-of-opportunity-for-action	1
240	Org3	Facebook	2020-12-04	At http://obesitycompetencies.gwu.edu, you can find resources that enhance your #obesity competencies and accommodate your personal learning style!	1
241	Org3	Facebook	2020-12-03	Parents and caregivers: visit http://weighinguide.com for support on holding conversations about #weight and #health with your children!	1
242	Org3	Facebook	2020-12-02	Did you hear the news? We reached 1️⃣0️⃣0️⃣0️⃣ downloads of the Why Weight Guide!	1
243	Org3	Facebook	2020-12-02	The Why Weight guide helps health care professionals hold effective conversations about #weight and #health with their patients. To download the guide or explore additional resources and videos, visit http://whyweightguide.org	1
244	Org3	Facebook	2020-12-02	Are you a health care professional looking for a short, accessible, practical, and informative guide to #obesity management? Then check out our new #WeightCantWait guide!	1
245	Org3	Facebook	2020-11-30	November is #DiabetesAwarenessMonth - Did you know that #obesity is the leading risk factor for type 2 diabetes? Research suggests that preventing excessive weight gain may be a promising target for intervention. Learn more with our #FastFact sheet: https://stop.publichealth.gwu.edu/sites/stop.publichealth.gwu.edu/files/Obesity-Related%20Chronic%20Diseases.pdf	7	Diabetes (type 2)
246	Org3	Facebook	2020-11-30	Just in! This edition of our newsletter covers the NEW #WeightCantWait guide we developed with 11 leading health professional organizations: http://mailchi.mp/gwu/nov27 @ObesityMedicine @ASMBS @TheAACE @AANP_News @theAMGA @AAPAorg @ACPM_HQ @TheEndoSociety @OMAsocial @ObesityAction	1
247	Org3	Facebook	2020-11-29	This week we’re using our #SaturdaySTOPSpotlight to highlight @AAPAorg ! In acknowledgement of #NationalDiabetesMonth, they’re sharing this Diabetes Leadership Toolkit for the effective management and treatment of diabetes. https://bit.ly/3eXxQSe	1
248	Org3	Facebook	2020-11-27	Effective obesity management does not end after a patient exits the building. Providers: the #WeightCantWait guide offers practical advice on how to follow-up with patients after the clinical encounter. http://go.gwu.edu/weightcantwait	1
249	Org3	Facebook	2020-11-27	Educators from @UTSWNews developed an mHealth curriculum to prepare physician assistant and clinical nutrition students to deliver weight management counseling in primary care settings. Learn more with our #ObesityCareCompetencies case study: https://obesitycompetencies.gwu.edu/wp-content/uploads/UTSW.pdf	1
250	Org3	Facebook	2020-11-26	Our #ObesityCareCompentencies guide and resources contain important tools for healthcare professionals across the field. Visit http://obesitycompetencies.gwu.edu and learn how to deliver effective #obesity prevention and treatment for your patients.	1
251	Org3	Facebook	2020-11-26	Providers: check out the #WeightCantWait flowchart illustrating effective clinical encounters with patients living with obesity. http://go.gwu.edu/wcwencounter	1
252	Org3	Facebook	2020-11-25	Providers: refer parents of children living w/ obesity to our Weigh -In site for practical advice on discussing weight & health w/ children and scenario-based solutions: http://weighinguide.com	1
253	Org3	Facebook	2020-11-24	retweet: Kudo's to the @STOPObesity and @RedstoneGWSPH for the outstanding #WeightCantWait guide. HT to everyone who supported this, including @ObesitySociety @ObesityAction @OMAsocial @ObesityMedicine @ASMBS @theAMGA @ACPinternists @AANP_NEWS @TheAACE and more.	1
254	Org3	Facebook	2020-11-24	Want to learn more about the causes of #obesity? Check out our #FastFact sheet to learn about how: •Behavioral •Economic •Environmental •Genetic & other factors contribute to this complex disease. https://stop.publichealth.gwu.edu/sites/stop.publichealth.gwu.edu/files/Causes%20of%20Obesity.pdf	4	Behavioral, economic, environmental, genetic; "complex disease", Behavioral, economic, environmental, genetic; , complex disease	3	complex disease
255	Org3	Facebook	2020-11-24	Thanks to @ConscienHealth for helping to develop and now share the newest @STOPObesity resource: #WeightCantWait for PC mgmt of #obesity, which you can find at http://go.gwu.edu/weightcantwait Please share so that we can get this tool into the hands of those who can use it.	1
256	Org3	Facebook		#WorldObesityLive is returning for the final time this December 4th with our webinar 'Joining the dots – a reflection on COVID-19 & Obesity', serving as an opportunity to reflect and explore priority actions. Timer clock 13:00 GMT Calendar 4th December Rightwards arrow Register now: https://zoom.us/webinar/register/WN_NdqFcwthQRqXU2P2Xb5ubw	1
257	Org3	Facebook	2020-11-23	retweet:#Truth: "One-size-fits-all advice to lose weight is worse than useless. Most often, it’s harmful." @ConscienHealth https://conscienhealth.org/2020/11/waiting-to-close-the-gap-in-primary-care-of-obesity/ @STOPObesity #obesity #healthcare #MedTwitter #primarycare	1
258	Org3	Facebook	2020-11-23	Healthcare professionals: if you’re asking yourself, “What do I need to know before I talk to my patients about #weight and #health?”, visit http://WhyWeightGuide.org to access our comprehensive guide, training videos, & readings.	1
259	Org3	Facebook	2020-11-23	Before Thanksgiving, be sure to read these @CDC guidelines on how to celebrate the holidays safely: https://cdc.gov/coronavirus/2019-ncov/daily-life-coping/holidays/thanksgiving.html Wishing everyone safe celebrations!	1
260	Org3	Facebook	2020-11-22	This week, we’re shining our #SaturdaySTOPSpotlight on @AANP_News ! To celebrate #NPWeek, they highlighted the stories of Nurse Practitioners across the country. Check out their guide to pursuing the NP path: http://aanp.org/news-feed/explore-the-variety-of-career-paths-for-nurse-practitioners	1
261	Org3	Facebook	2020-11-22	In this http://WhyWeightGuide.org video, our medical director @scottkahan acts out clear examples of what NOT to do when discussing #weight and #health with patients including: No entry signblaming/shaming No entry signlecturing/talking down No entry signusing authoritarian commands	1
262	Org3	Facebook	2020-11-22	Learn how #TripleDutyActions (a part of the #GlobalSyndemic framework) can help us effectively retweet: address the overlapping pandemics of #COVID19, #climatechange & #obesity with Dr. Dietz's @WorldObesity & @futureoffoodorg ’s #WorldObesityLive recording: http://youtu.be/lyCFPeU-M9U	1
263	Org3	Facebook	2020-11-20	Scenario: Your school district now performs annual BMI screenings. Your child brings home a BMI report card which shows that your child has #obesity. The child asks what this means. What do you say?This is one situation we present on our Weigh In website for parents/caregivers preparing for discussions about #weight and #health with their children. Read our suggestion to this situation then explo…	1
264	Org3	Facebook	2020-11-19	Important read from @ConscienHealth - we encourage everyone to check out the wide variety of tools and resources available to help address #weightbias. Our fact sheet can be found at http://go.gwu.edu/obesityfacts! @RedstoneGWSPH	12
265	Org3	Facebook	2020-11-19	What does a provider need to know about #obesity even before their patient steps into the waiting room? Find out with our Pre-Encounter section of the NEW Weight Can’t Wait guide http://go.gwu.edu/weightcantwait #WeightCantWait	1
266	Org3	Facebook	2020-11-18	Want to learn more about respectful care accommodations for patients with #obesity? Then visit http://ObesityCompetencies.gwu.edu! Health care professionals across the field can only benefit from enhancing their #ObesityCareCompetencies.	1
267	Org3	Facebook	2020-11-18	retweet:The U.S. adult #obesity rate has surpassed 40%. To address this important issue, @STOPobesity has released the #WeightCantWait guide to provide short, accessible information on #obesity management for healthcare providers. Read it here: https://stop.publichealth.gwu.edu/wcw #WellnessWednesday	1
268	Org3	Facebook	2020-11-17	Over at @IUSPH , educators developed an “Obesity and Health” undergrad minor that addresses the etiology, assessment, social determinants, prevention, and treatment of overweight and obesity. http://obesitycompetencies.gwu.edu/competencies Could your academic institution implement something similar?	1
269	Org3	Facebook	2020-11-16	#FastFact: Workers within the food system often experience suboptimal working conditions, poor health, and poverty, all of which contribute to food insecurity, susceptibility to #COVID19, and disruptions of the food supply chain.	1
270	Org3	Facebook	2020-11-16	Learn more with our COVID19, Food Systems, and Obesity fact sheet: https://stop.publichealth.gwu.edu/sites/stop.publichealth.gwu.edu/files/COVID-19%2C%20Food%20Systems%2C%20and%20Obesity.pdf	1
271	Org3	Facebook	2020-11-15	At http://ObesityCompetencies.gwu.edu, we offer 10 case studies showcasing how competencies are integrated into #obesity education across the health professions!	1
272	Org3	Facebook	2020-11-14	This week, our #SaturdaySTOPSpotlight is on @TheEndoSociety ! Join them from December 2-3 in a virtual discussion about developments in endocrine technology & research. http://bit.ly/3kVx2j1	1
273	Org3	Facebook	2020-11-13	In this episode of @GWpublichealth ’s Healthy You podcast, Dr. Loretta DiPietro discusses trends in physical activity and weight during #COVID19.	1
274	Org3	Facebook	2020-11-13	Learn more about #Obesity and #COVID19 with our #FastFact sheet: https://stop.publichealth.gwu.edu/sites/stop.publichealth.gwu.edu/files/Obesity%20and%20COVID-19.pdf	1
275	Org3	Facebook	2020-11-12	We developed a Discussion Toolkit with @HealthierGen to prepare parents & caregivers to hold conversations about #weight and #health with their children. Inside the kit, you can access resources, handouts, and technology. https://stop.publichealth.gwu.edu/sites/stop.publichealth.gwu.edu/files/documents/LowRes%20Weigh-In%20Discussion%20Materials.pdf	1
276	Org3	Facebook	2020-11-11	In this video, our medical director @scottkahan provides examples of positive ways to discuss lifestyle changes with a patient, including several motivational interviewing techniques.	1
277	Org3	Facebook	2020-11-11	Healthcare providers: on our Why Weight site we offer videos showing you how to hold effective conversations about #weight and #health with your patients. Visit: http://whyweightguide.org/videos.php	1
278	Org3	Facebook	2020-11-11	Joining @ECPObesity in their #LivingWithObesity campaign, it is important to understand that when people living with #obesity internalize weight stigma, they apply harmful stereotypes to themselves, damaging their emotional and physical health.	12
279	Org3	Facebook	2020-11-11	Learn more with our #FastFact sheet on Weight Bias and Stigma: https://stop.publichealth.gwu.edu/sites/stop.publichealth.gwu.edu/files/Weight%20Bias%20and%20Stigma.pdf	12
280	Org3	Facebook	2020-11-09	#Obesity is a severe risk factor for #COVID19 related morbidity/mortality. Healthcare providers: access short, accessible, and practical information to support you in delivering effective #obesity management with the guide. http://go.gwu.edu/weightcantwait	7	COVID
281	Org3	Facebook	2020-11-09	Check out the NEW #WeightCantWait guide released by @STOPobesity ! The guide offers short, accessible, and practical information to support providers in delivering effective #obesity management. http://go.gwu.edu/weightcantwait	1
282	Org3	Facebook	2020-11-06	Check out the NEW #WeightCantWait guide released by @STOPobesity ! The guide offers short, accessible, and practical information to support providers in delivering effective #obesity management. http://go.gwu.edu/weightcantwait	1
283	Org3	Facebook	2020-11-08	Check out the #WeightCantWait guide @STOPObesity and partners! A fantastic, practical resource for #healthcare providers in #primarycare setting and beyond. Pls share and retweet! @saez_bms @Soc_Endo @publichealth_ch @HerzstiftungCH @sge_ssn @ErnMedBlog	1
284	Org3	Facebook	2020-11-06	This week, we’re using our #SaturdaySTOPSpotlight to highlight our new #WeightCantWait guide & our partners involved in its development! http://go.gwu.edu/weightcantwait @ObesityMedicine @ASMBS @TheAACE @AANP_News @theAMGA @AAPAorg @ACPM_HQ @TheEndoSociety @OMAsocial @ObesityAction	1
285	Org3	Facebook	2020-11-06	This week, we’re using our #SaturdaySTOPSpotlight to highlight our new #WeightCantWait guide & our partners involved in its development! http://go.gwu.edu/weightcantwait @ObesityMedicine @ASMBS @TheAACE @AANP_News @theAMGA @AAPAorg @ACPM_HQ @TheEndoSociety @OMAsocial @ObesityAction, eek, we’re using our #SaturdaySTOPSpotlight to highlight our new #WeightCantWait guide & our partners involved in i…	1
286	Org3	Facebook	2020-11-06	The U.S. adult #obesity rate has surpassed 40%. To help address this important issue, we worked with @STOPObesity on the NEW #WeightCantWait guide to provide short, accessible and practical information on effective #obesity management. http://go.gwu.edu/weightcantweight	1
287	Org3	Facebook	2020-11-06	Providers can also keep the #WeightCantWait Curated Resources in their toolbox for reference. Access provider resources, guidelines, image galleries, and material to share with patients at: http://go.gwu.edu/wcwresources	1
288	Org3	Facebook	2020-11-05	The conversation about #obesity doesn’t end when your patient exits the building. In our NEW #WeightCantWait guide, we offer providers guidance on proceeding with #obesity treatment after the clinical encounter. http://go.gwu.edu/wcwguide	1
289	Org3	Facebook	2020-11-05	#Disparities in #COVID19, #obesity, and #health are the unmistakable result of a thread of racism woven though all of our history. @DrArd and @askdrfatima spelled this out with compelling clarity at #OW2020 this week.	1
290	Org3	Facebook	2020-11-04	The conversation about #obesity doesn’t end when your patient exits the building. In our NEW #WeightCantWait guide, we offer providers guidance on proceeding with #obesity treatment after the clinical encounter. http://go.gwu.edu/wcwguide	1
291	Org3	Facebook	2020-11-02	retweet The U.S. adult #obesity rate has surpassed 40%. To help address this important issue @STOPobesity has released the NEW #WeightCantWait guide to provide short, accessible and practical information on effective #obesity management. https://stop.publichealth.gwu.edu/wcw	1
292	Org3	Facebook	2020-11-03	Effective #obesity management begins before a patient steps into the waiting room. Check out our NEW #WeightCantWait guide for information on how to support patients living with #obesity pre-clinical encounter. http://go.gwu.edu/wcwguide	1
293	Org3	Facebook	2020-11-02	Check out the NEW #WeightCantWeight Guide from @STOPObesity ! http://go.gwu.edu/weightcantwait	1
294	Org3	Facebook	2020-11-02	Check out the NEW #WeightCantWait guide released by @STOPobesity ! The guide offers short, accessible, and practical information to support providers in delivering effective #obesity management. Learn more here: http://go.gwu.edu/weightcantwait	1
295	Org3	Facebook	2020-11-02	Tomorrow is election day! Before you leave your home to #vote, be sure to check out these health and safety precautions from @CDCgov to protect yourself & others. https://cdc.gov/coronavirus/2019-ncov/daily-life-coping/going-out/Voting-tips.html	1
296	Org3	Facebook	2020-11-02	– and if you are attending #OW2020, be sure to check out our virtual exhibit to learn more about #WeightCantWait! @ObesityWeek	1
297	Org3	Facebook	2020-11-01	Check out this @ObesityAction piece by @DrRobertKushner on “Understanding Life Events and How They Affect Your Weight” Quote Tweet	1
298	Org3	Facebook	2020-11-01	Want to learn more about the causes of #obesity? Check out our #FastFact sheet to learn about how: •Behavioral •Economic •Environmental •Genetic & other factors contribute to this complex disease. https://stop.publichealth.gwu.edu/sites/stop.publichealth.gwu.edu/files/Causes%20of%20Obesity.pdf	4	Behavioral, economic, environmental, genetic; "complex disease", Behavioral, economic, environmental, genetic; , complex disease	3	complex disease
299	Org3	Facebook	2020-10-31	Our #SaturdaySTOPSpotlight for this week is the @oaactionallianc ! A leader in the prevention & management of #osteoarthritis, we are lucky to have the OA Action Alliance as a #STOP member. Check out their Lunch & Learn event on November 18th: https://oaaction.unc.edu/webinar/how-oa-treatment-can-become-a-shared-decision-november-18-2020/	1
300	Org3	Facebook	2020-10-30	Those who experience weight-based discrimination are less likely to seek healthcare and more likely to engage in unhealthy eating behaviors like disordered eating. More on weight stigma, eating disorders, and #obesity in the Oct. issue of our newsletter: http://mailchi.mp/gwu/oct20	12
301	Org3	Facebook	2020-10-30	Parents and caregivers: the time to address #weight and #health with your child is now. Childhood #obesity disproportionately impacts Black and Hispanic children which puts them at greater risk of #COVID19 hospitalization. Info source: @CDCgov	7	obesity as risk for COVID hospitLIZATION
302	Org3	Facebook	2020-10-30	Visit http://WeighInGuide.com for our e-guide, scenarios, and resources to support you in planning discussions about #weight and #health with your child.	1
303	Org3	Facebook	2020-10-29	Healthcare professionals: if you’re asking yourself, “What do I need to know before I talk to my patients about #weight and #health?”, then visit http://WhyWeightGuide.org to access our comprehensive guide, training videos, & readings.	1
304	Org3	Facebook	2020-10-28	This #FastFact sheet from @STOPobesity explains the impact of #COVID19, #foodsystems, and #obesity. https://stop.publichealth.gwu.edu/sites/stop.publichealth.gwu.edu/files/COVID-19%2C%20Food%20Systems%2C%20and%20Obesity.pdf	1
305	Org3	Facebook	2020-10-28	Great tips on talking with patients about weight in a non-judgmental, supportive way. @STOPObesity ’s http://WhyWeightGuide.org is another great resource. Check it out! #obsm #obsmuk #obesity	1
306	Org3	Facebook	2020-10-28	Our #ObesityCareCompentencies guide and resources contain important tools for healthcare professionals across the field. Visit http://obesitycompetencies.gwu.edu and learn how to deliver effective #obesity prevention and treatment for your patients.	1
307	Org3	Facebook	2020-10-28	Tomorrow during our broadcast (live on Facebook at 3:00 PM EST) we will be dispelling common myths and misconceptions around obesity. Before that, we want to hear your thoughts on some of these myths! Comment below to let us know what you think!	1
308	Org3	Facebook	2020-10-27	This @WSJ article covers the rising costs of employer-based health care due to #COVID19.	1
309	Org3	Facebook	2020-10-27	At http://stop.publichealth.gwu.edu/policy we offer a state-by-state analysis of Medicaid and State-Employee health insurance coverage for #obesity prevention and treatment ––an important consideration as obesity increases the risk of #COVID19 related morbidity and mortality.	7	COVID 19 morbidity and mortality
310	Org3	Facebook	2020-10-26	Educators from @IUSPH developed a 15-credit #Obesity and Health minor that covers these key #ObesityCareCompetencies: -Obesity as a disease -Care disparities/inequities -Community care -Lang. for obesity -Care strategies Read the Case Study + others at: http://obesitycompetencies.gwu.edu	3	" developed a 15-credit #Obesity and Health minor that covers these key #ObesityCareCompetencies: -Obesity as a disease"
311	Org3	Facebook	2020-10-26	Join us! Next week is ObesityWeek Interactive. STOP will be exhibiting and have a poster presentation. Hope to see you there! #OW2020	1
312	Org3	Facebook	2020-10-24	This week, we’re shining our #SaturdaySTOPSpotlight on @BizGrpHlth and their recent podcast with @PeggyNCQA on telehealth, the social determinants of health, and preventative care. Headphone Listen at: https://businessgrouphealth.org/en/topics/podcast?utm_campaign=Podcast&utm_content=twitter&utm_medium=social&utm_source=twitter	1
313	Org3	Facebook	2020-10-23	Learn more about how #obesity contributes to coverage costs with this #FastFact sheet from @STOPobesity ! https://stop.publichealth.gwu.edu/sites/stop.publichealth.gwu.edu/files/Obesity%20Care%20Coverage.pdf	1
314	Org3	Facebook	2020-10-23	Today marks the last day of #NHEW2020! Join @sophetweets between 2-3pm ET for their panel on the role of health education specialists	1
315	Org3	Facebook	2020-10-22	It is critical that health care professionals demonstrate an applied understanding of the #ObesityCareCompetencies in order to deliver effective #obesity care. For our guide and resources, visit http://obesitycompetencies.gwu.edu	1
316	Org3	Facebook	2020-10-22	#FastFact People living with #obesity have high levels of internalized weight stigma, making it harder for them to seek medical care. Learn more with our Fact sheet on Weight Bias and Stigma. #NHEW2020 @sophetweets http://stop.publichealth.gwu.edu/fastfacts	12
317	Org3	Facebook	2020-10-22	Scenario: Your son, who is of average weight, pokes fun of your daughter and calls her “fat.” What do you say?	1
318	Org3	Facebook	2020-10-22	On http://WeighInGuide.com, we share realistic scenarios to help parents & caregivers prepare for conversations about #weight and #health with their children. For tips on Scenario No. 5, visit: http://weighinguide.com/situation/five/index.html	1
319	Org3	Facebook	2020-10-21	Tune in for “Supporting Employee Mental Health and Well-being during COVID-19” during #NHEW2020. Learn more http://sophe.org	1
320	Org3	Facebook	2020-10-21	Data from a recent study published in @ObesitySociety reveals that “documenting a diagnosis of obesity may be an important step toward engaging patients to lose #weight.” https://onlinelibrary.wiley.com/doi/full/10.1002/oby.22954	3	OBESITY AS DISEASE; SHOULD BE DOCUMENTED IN THE CHART
321	Org3	Facebook	2020-10-21	This is why it is essential for health care professionals to practice #ObesityCareCompentency No. 1: Demonstrate a working knowledge of #obesity as a disease. Check out http://Obesitycompetencies.gwu.edu for more resources on training in effective obesity prevention and management.	3
322	Org3	Facebook	2020-10-20	#FastFact: Approximately 1 in 4 women and 1 in 8 men gain 44+ lbs between the ages of 18 and 55 years, increasing chronic disease risk. Research suggests that preventing excessive weight gain during this period may be a promising target for intervention. https://stop.publichealth.gwu.edu/sites/stop.publichealth.gwu.edu/files/Obesity-Related%20Chronic%20Diseases.pdf	3	"Demonstrate a working knowledge of #obesity as a disease."
323	Org3	Facebook	2020-10-20	Today, @sophetweets #NHEW2020 is focusing on the intersection between health education and #COVID19, For more resources on this topic, check out our #FastFact sheet on #Obesity and COVID-19!	1
324	Org3	Facebook	2020-10-20	Health care providers report that common barriers to discussing #weight with patients include: •Lack of time •Insufficient reimbursement •Lack of training •Discomfort raising the topic	1
325	Org3	Facebook	2020-10-20	Visit http://WhyWeightGuide.org for tools and resources to help you overcome these barriers.	1
326	Org3	Facebook	2020-10-18	At @UWDentalSchool educators have developed an oral health curriculum that will be available for training predoctoral dental students and prelicensure dental hygiene students at other institutions. Read the full #ObesityCareCompetencies case study at: https://obesitycompetencies.gwu.edu/wp-content/uploads/UW.pdf	1
327	Org3	Facebook	2020-10-17	Here our medical director @scottkahan provides examples of positive ways to discuss lifestyle changes with a patient, including several motivational interviewing techniques. For more helpful tips, visit: http://whyweightguide.com!	1
328	Org3	Facebook	2020-10-16	A Key consideration for fostering effective communication about #weight and #health is the impact of trauma and need for trauma-informed care. Learn why by reading our guide at http://whyweightguide.org	1
329	Org3	Facebook	2020-10-15	Providers: refer parents of children living w/ obesity to our Weigh-In site for practical advice on discussing weight & health w/ children and scenario-based solutions: http://weighinguide.com	1
330	Org3	Facebook	2020-10-14	Preparing future providers to care competently and compassionately for patients w/ #obesity should be a top priority for professional health training programs. That’s why we offer resources to help improve education & training on obesity. Find them at: http://obesitycompetencies.gwu.edu	1
331	Org3	Facebook	2020-10-13	DYK that perceived weight-based discrimination rose 66% btw 1990s & 2000s? Weight bias & stigma can be harmful to the personal lives and clinical experiences of those w/ obesity. Read the full #FastFact sheet w/ methods of countering weight bias here: http://stop.publichealth.gwu.edu/resources	12
332	Org3	Facebook	2020-10-12	Are you a provider or community leader who works with parents? @STOPObesity produced a toolkit based on the Weigh In Guide to provide everything you need to host small group discussions with parents to help them talk to their kids about weight and health. https://stop.publichealth.gwu.edu/sites/stop.publichealth.gwu.edu/files/documents/LowRes%20Weigh-In%20Discussion%20Materials.pdf	1
333	Org3	Facebook	2020-10-10	Today is #WorldMentalHealthDay. Obesity and weight bias are associated w anxiety and mood disorders. People w severe mental illness can suffer from #obesity. You are not alone. Seek support and medical treatment when you need it. There are effective medical treatments out there.	7	mental illness	4	mental illness
334	Org3	Facebook	2020-10-10	This week’s #SaturdaySTOPSpotlight is on @ObesityAction who was recently featured by @TheCreativeC and @novonordisk for their resources on #COVID19 and #obesity! Read more about their feature at: https://thecreativecoalition.org/obesityPSA/	1			mental illness
335	Org3	Facebook	2020-10-10	Research shows that people w #obesity have greater odds of developing depression and people w depression have greater odds of developing obesity. On #WorldMentalHealthDay we recognize the need to ensure that quality mental health care is available to everyone who needs it.	7	mental illness	4	mental illness
336	Org3	Facebook	2020-10-09	Last week’s #WorldHeartDay emphasized our need to improve #obesity prevention and management in order to prevent #CVD.	7	CVD		mental illness
337	Org3	Facebook	2020-10-09	Our momentum can’t stop there. Healthcare providers: visit http://WhyWeightGuide.org for our Toolguide and videos to help you facilitate effective conversations about #weight and #health with your patients.	1
338	Org3	Facebook	2020-10-08	#COVID19 has exposed our need for more comprehensive #obesity care.	1
339	Org3	Facebook	2020-10-08	Healthcare providers: visit http://obesitycompetencies.gwu.edu for resources on the 10 top-line Competencies to enhance your #obesitycare.	1
340	Org3	Facebook	2020-10-06	We Red heart this PSA from @TheCreativeC ! Artists are using their platform to share important facts about #obesity as a risk factor for #COVID19. https://youtu.be/mrFcAZn_sfE	7	COVID 19
341	Org3	Facebook	2020-10-05	Need to catch up on our newsletters? Start with September and explore all of our past issues at: https://us13.campaign-archive.com/home/?u=d290aff90000a1e995939c71f&id=dbe9b8d0e6	1
342	Org3	Facebook	2020-10-05	You can stay up to date on newsletter releases by joining our mailing list. Visit https://stopobesityalliance.us13.list-manage.com/subscribe?u=d290aff90000a1e995939c71f&id=dbe9b8d0e6 to sign up!	1
343	Org3	Facebook	2020-10-03	Through the Early Childhood Oral Health Training Program at @UWDentalSchool , dental students learn about the intersect of #obesity & dentistry. This program will be applied at other academic institutions in the future! Read the full case study at: https://obesitycompetencies.gwu.edu/wp-content/uploads/UW.pdf	1
344	Org3	Facebook	2020-10-03	Our #SaturdaySTOPSpotlight is on @AspenWeb ! This upcoming Malnutrition Awareness Week they’re offering resources to educate healthcare professionals, educate consumers/patients, and increase awareness of nutrition’s role on patient recovery. #MAW2020 http://nutritioncare.org/maw/	1
345	Org3	Facebook	2020-10-03	New @HealthyAmerica1 policy brief reveals startling data that the prevalence of #obesity in the US has exceeded 40%.	1
346	Org3	Facebook	2020-10-03	Health care providers: Effective #obesity prevention & management is more important now than ever, esp. as it increases risk of #COVID19 morbidity/mortality. Learn about the 10 #ObesityCareCompentencies to improve the quality of obesity care on our site: http://obesitycompetencies.gwu.edu	7	COVID 19 morbidity and mortality
347	Org3	Facebook	2020-10-01	In this brand new September issue of our monthly newsletter, Dr. Dietz writes about #ChildhoodObesityMonth in the #COVID19 era. Read it at http://mailchi.mp/gwu/sep20 and subscribe to receive future newsletters!	1
348	Org3	Facebook	2020-10-01	Yesterday marked the last day of #ChildhoodObesityAwarenessMonth. Recent @CDCgov data reveals racial disparities in hospitalization rates of children living with #obesity due to #COVID19.	1
349	Org3	Facebook	2020-10-01	Moving forward we need to be asking ourselves: What can we do to prevent childhood obesity? @CDCgov recommends engaging state/local health departments, educators, and health care providers to improve childhood #health.	9	state/local health departments, educators and health care providers to prevent childhood obesity
350	Org3	Facebook	2020-09-30	Today marks the end of #HealthyAgingMonth but #obesity & #weight mgmt should be considered critical components of our overall health every day. Parents & caregivers, healthcare profs. & individuals who want to effectively address weight: visit http://stop.publichealth.gwu.edu	1
351	Org3	Facebook	2020-09-29	Today is #WorldHeartDay! When it comes to heart health, #obesity prevention and management are Key in order to decrease risk of cardiovascular disease.	7	cardiovascular disease
352	Org3	Facebook	2020-09-29	To health care professionals: Are you looking strengthen your ability to discuss #weight and #health with your patients? Visit http://WhyWeightGuide.org for helpful resources on delivering effective #obesity care.	1
353	Org3	Facebook	2020-09-28	New infographic (offered in Engl. & Span.) by @NIHCMfoundation explores “Systemic Racism, Disparities & COVID-19: Impacts on Latino Health.” The data shows that Latinx people account for 18.5% of the population but 29.5% of #COVID19 cases. Read it here:	1
354	Org3	Facebook	2020-09-28	#Obesity disproportionately affects communities of color, putting those populations at higher risk of #COVID19 morbidity and mortality. Learn more with our #FastFact sheet located on our website at: http://stop.publichealth.go.gwu.edu/resources	7	COVID 19 morbidity and mortality
355	Org3	Facebook	2020-09-27	Health care providers, On http://whyweightguide.org, we offer tools to help you deliver effective #obesity care. Explore our resources today!	1
356	Org3	Facebook	2020-09-26	We developed our Weigh In Guide with @HealthierGen to support parents and caregivers approaching discussions about #weight and #health with their children. Visit the Weigh In website and find our resources and comprehensive guide: http://weighinguide.com	1
357	Org3	Facebook	2020-09-25	At @USCChanOSOT , educators developed a Lifestyle Redesign curriculum to better prepare future health care professionals to design & deliver occupational therapy interventions for clients w/ #obesity. @USC Read the full #ObesityCareCompetencies case study: https://obesitycompetencies.gwu.edu/wp-content/uploads/1_Case-Study_USC-rev.3-1.pdf	1
358	Org3	Facebook	2020-09-24	STOP Obesity is presenting a poster at #OW2020! Join us online this year.	1
359	Org3	Facebook	2020-09-24	Our dir. Dr. Dietz argues that we need a new approach to prevent #obesity – one that's aimed at the community level, increases healthy options, reduces deterrents, builds community capacity, & improves social/economic resources. Read more in @AmerAcadpeds : http://go.gwu.edu/newapproach	9	increase healthy options, reduce detereents, build community capacity, improve social/economic resources
360	Org3	Facebook	2020-09-23	In their new blog post, @American_Heart and @Voices4HK show us that our children’s virtual learning environment can and should still integrate #PEin2020. Read it here! https://voicesforhealthykids.org/news/pe-during-the-pandemic-how-virtual-classes-provide-new-opportunities-for-schools-and-students	1
361	Org3	Facebook	2020-09-23	#WorldPatientSafetyDay was 1 week ago on Sept. 16. Moving forward, how will we #uniteforsafecare so that all patients have access to safe, non-discriminatory care? @GWPublicHealth @GWTweets	1
362	Org3	Facebook	2020-09-23	When it comes to the prevention & management of #obesity, reducing weight bias and stigma among health professionals is key to effective care. That’s why we love this @ConscienHealth piece with a doctor’s honest apology towards patients living w/ obesity.	12
363	Org3	Facebook	2020-09-23	Health care professionals can learn more about #ObesityCareCompetencies that enhance #obesity care and reduce weight bias and stigma on our site: http://obesitycompetencies.gwu.edu	12
364	Org3	Facebook	2020-09-21	Check out this conversation held by @theNASEM on the Impact of #COVID19 on Communities of Color. https://nationalacademies.org/resource/conversations-on-covid-19-impacts-on-communities-of-color?utm_source=NASEM+News+and+Publications&utm_campaign=4f2ad1bbf4-COVID_Communities_Color_2020_09_02&utm_medium=email&utm_term=0_96101de015-4f2ad1bbf4-104404393&goal=0_96101de015-4f2ad1bbf4-104404393&mc_cid=4…	1
365	Org3	Facebook	2020-09-21	Want to learn more about #healthequity and #COVID19? Read our recent #FastFact sheet on Racial Disparities and #Obesity. Find more Fast Facts on the Resources tab of our website at: http://Stop.publichealth.go.gwu.edu/resources	1
366	Org3	Facebook	2020-09-20	On this first Saturday of #HispanicHeritageMonth, we want to feature our #SaturdaySTOPSpotlight on @SaludAmerica and their work to promote the #health of LatinX children and families by driving community engagement and addressing inequities! Learn more: http://salud-america.org	1
367	Org3	Facebook	2020-09-18	In 2011 when the US failed to achieve the Healthy People 2010 obesity goals, @TouroCalifornia stepped up & created the Fundamentals for an Osteopathic Obesity Designed Study (FOODS) which improved students’ attitudes toward & knowledge of #obesity. http://obesitycompetencies.gwu.edu/wp-content/uploads/TUCOM.pdf	1
368	Org3	Facebook	2020-09-17	Are you a healthcare professional looking to strengthen your core #obesity care knowledge? On http://ObesityCompetencies.gwu.edu, we suggest educational resources that accommodate a variety of learning styles – from self-reflecting/journaling to group discussions to online courses.	1
369	Org3	Facebook	2020-09-16	Scenario 2: Your child asks, “Am I fat?” and says they want to go on a diet. They are emotional because they say they look different than the other kids in their class. What do you say?	1
370	Org3	Facebook	2020-09-16	This is one realistic situation we present on our Weigh In website for parents/caregivers preparing for discussions about #weight and #health with their children. For conversation tips on how to effectively approach this conversation and more, visit http://weighinguide.com/situation/two/index.html	1
371	Org3	Facebook	2020-09-15	This @ScienceMagazine article discusses #obesity as the most severe risk factor for #CoVid19 morbidity and mortality. Want to understand why? Read our #FastFact on Obesity and CoVid19 on our website: http://stop.publichealth.gwu.edu/resources http://sciencemag.org/news/2020/09/why-covid-19-more-deadly-people-obesity-even-if-theyre-young	7	COVID 19 morbidity and mortality
372	Org3	Facebook	2020-09-14	Why don’t some patients with #obesity seek help? Common reasons include concerns that providers will not treat them with compassion and respect, that offices will lack equipment to properly accommodate them, or they will be viewed as “not trying hard enough.”	1
373	Org3	Facebook	2020-09-14	Providers: have confidence in your ability to facilitate effective conversations about #weight and #health with your patients by learning from our Why Weight website and guide. Visit: http://whyweightguide.org	1
374	Org3	Facebook	2020-09-13	This year's @EASOobesity #ECOICO discussed a socio-ecological approach to addressing #weight bias & stigma with topics like #PeopleFirst language, the social/biological drivers of #obesity, & ways patients can recognize internalized weight bias!	1		4	social, biological
375	Org3	Facebook	2020-09-12	This week’s #SaturdaySTOPSpotlight features @UconnRuddCenter ! Blaming people for their #weight is on the decline, thanks to orgs like the Rudd Center that are dedicated to promoting solutions to address #obesity, #health, and #weightbias. Clapping hands signClapping hands sign	12
376	Org3	Facebook	2020-09-10	DYK that on our http://ObesityCompetencies.gwu.edu website we offer Keycap ten #ObesityCareCompetencies Case Studies from different teaching programs across the country?	1
377	Org3	Facebook	2020-09-10	One of our Case Studies features our very own @GWSMHS ’s immersive, 3-day experiential learning summit to teach 3rd yr medical students about the social cultural influencers of #obesity & what clinicians can do to mitigate them. Read the full case study on the OCC site!	1
378	Org3	Facebook	2020-09-08	One resource we suggest on our http://ObesityCompetencies.gwu.edu site is @Harvard ’s implicit bias test on Weight Bias. Taking this test can help providers begin #ObesityCareCompetency no. 7: Employ strategies to minimize bias towards and discrimination against people with #obesity.	12
379	Org3	Facebook	2020-09-08	Our faculty members are participating in the #ScholarStrike this week - learn more and find resources by following @scholarstrike . Check out @ResilNation 's #FosteringEquity guide at http://go.gwu.edu/fosteringequity. Read more about our anti-racist action agenda at https://redstone.publichealth.gwu.edu/resources/redstone-global-center-anti-racist-action-agenda	1
380	Org3	Facebook	2020-09-07	Recognizing #obesity as a complicated disease is also an important first step for health care providers to confront #weightbias and stigma and enhance their care for patients living with obesity!	3	"Recognizing #obesity as a complicated disease"	12
381	Org3	Facebook	2020-09-07	In this http://WhyWeightGuide.org video, our medical director @scottkahan acts out clear examples of what NOT to do when discussing #weight and #health with patients including: No entry signblaming/shaming No entry signlecturing/talking down No entry signusing authoritarian commands	1
382	Org3	Facebook	2020-09-06	Providers report several barriers to addressing #weight with their patients including: •Lack of time •Insufficient reimbursement •Lack of training, tools & confidence On http://WhyWeightGuide.org you can access our free guide w/ tips & resources on overcoming these barriers.	1
383	Org3	Facebook	2020-09-05	This week’s #SaturdaySTOPSpotlight features @OMASocial 's new Self-Assessment Program (SAP) designed for health care providers to self-study #obesity medicine & learn how to deliver more effective obesity care Heavy plus signIt can be completed from home! Learn more: http://obesitymedicine.org/oma-sap/	1
384	Org3	Facebook	2020-09-04	At http://ObesityCompetencies.gwu.edu, we put together 10 case studies intended to showcase real-world implementation of #ObesityCareCompetencies to inspire leaders in each profession to prioritize #ObesityEducation across the continuum of training.	1
385	Org3	Facebook	2020-09-04	This week we’re featuring @AUHSOP 's integrated PharmD curriculum that prepares trainees to deliver community based -non/pharmacological #obesity management care. The curriculum can be adapted by other schools of pharmacy w/ partner community clinics! Open book: http://obesitycompetencies.gwu.edu/wp-content/uploads/AUHSP.pdf	11	non-pharmacological obesity management care
386	Org3	Facebook	2020-09-03	Take this #HealthyAgingMonth as an opportunity to consider #obesity & #weight management as critical components of our overall health. Parents & caregivers, healthcare profs., & individuals who want to effectively address weight: visit http://stop.publichealth.gwu.edu for our resources!	1
387	Org3	Facebook	2020-09-02	Are you an #educator looking to enhance your students’ understanding of #obesity & teach effective skills in #obesity prevention and management? At http://ObesityCompetencies.gwu.edu, we’ve gathered helpful resources relevant to your profession. Visit our site & learn about our approach!	1
388	Org3	Facebook	2020-09-01	Are you looking for guidance on how to discuss #weight & #health with your child this National Childhood Obesity Awareness Month? Our http://WeighInGuide.com offers tools & resources to support you in these discussions, including our comprehensive guide.	1
389	Org3	Facebook	2020-08-31	retweet Profiled: Donna Ryan: bringing people together and making things happen https://bit.ly/2GbO8d7 #obesity @PBRCNews @WorldObesity @STOPObesity	1
390	Org3	Facebook	2020-08-31	What we’re reading from @MarketWatch this week: “How Meat Plant #COVID19 Outbreaks Revealed ‘Devastating’ Workplace Conditions”	1
391	Org3	Facebook	2020-08-31	#FastFact: Workers within the food system who experience suboptimal working conditions, poor #health, and poverty are more susceptible to #COVID19, food insecurity, and disruptions of the food supply chain! Read our fact sheet to learn more: http://stop.publichealth.gwu.edu/sites/stop.pub	1
392	Org3	Facebook	2020-08-31	This week’s #SaturdaySTOPSpotlight is on 2020 @ObesityCareWeek champion, @WorldObesity ! Their very 1st virtual @SCOPEObesity school educated participants on #Obesity, #CVD, & competencies for effective obesity management! Check out their resources: http://worldobesity.org/scope	1
393	Org3	Facebook	2020-08-30	In this @AmerAcadPeds piece our dir Dr Dietz suggests broad strategies around #obesity prevention at the community level to increase healthy options, reduce deterrents, build community capacity & improve social & economic resources. Read the full text at http://go.gwu.edu/newapproach	9	increase healthy options, reduce deterrents, build community capacity, improve social and economic resources
394	Org3	Facebook	2020-08-30	#ObesityCareCompetency #4: Describe the benefits of working interprofessionally to address #Obesity to achieve results that cannot be achieved by 1 health professional. Enhancing the #OCCs requires collaboration & dialogue across healthcare professions. http://obesitycompetencies.gwu.edu	1
395	Org3	Facebook	2020-08-28	At @ChildrensNatl educators created a home-visitation curriculum to improve medical residents’ knowledge of the #SDOH & #Obesity. Participants reported improved counseling skills & felt it was a valuable experience. #ObesityCareCompetencies http://obesitycompetencies.gwu.edu/wp-content/uploads/CNHS.pdf	1
396	Org3	Facebook	2020-08-27	#NAFLD affects 1/4 Americans and is now the most common cause of liver dysfunction. The onset and progression of NAFLD are closely linked to insulin resistance & abdominal #obesity in both adults & children. Learn more w/ our Infographic on "Obesity & Fatty Liver Disease."	7	NAFLD (causes liver dysfunction)
397	Org3	Facebook	2020-08-27	On Aug. 28, join @NMQF for “A Call to Action in Addressing #Obesity in Communities of Color” which will examine how disparities have been magnified by #COVID19. Visit: http://events.r20.constantcontact.com/register/eventReg?oeidk=a07eh9iz0ag1d209d77&oseq=&c=&ch= to register!	1
398	Org3	Facebook	2020-08-26	#FastFact: Researchers found that portion sizes are now 2-5x larger than they were a few decades ago. Portion size is one of the behavioral risk factors for #obesity. Learn about other risk factors by reading our “Causes of Obesity” fact sheet: http://stop.publichealth.gwu.edu/resources	4	behavioral (larger portion sizes)
399	Org3	Facebook	2020-08-25	We created an interactive guide to support parents and caregivers in facilitating conversations about #weight and #health with their children and we want to hear from you! Please contact us and send along your personal story at obesity@gwu.edu	1
400	Org3	Facebook	2020-08-24	A Key consideration for fostering effective communication about #weight and #health is the impact of trauma and need for trauma-informed care. Learn why by reading our guide at http://whyweightguide.org	1
401	Org3	Facebook	2020-08-24	Our Dr. Dietz suggests public policies to reduce #sugarydrink consumption among children and adolescents in this @AmerAcadPeds piece. Read the full text at: http://go.gwu.edu/aapsugar	1
402	Org3	Facebook	2020-08-23	This week we’re shining our #SaturdaySTOPSpotlight on @ASMBS ! The 2020 @ObesityCareWeek Champions have a webinar on Aug. 27 w/ expert panelists who can help health care providers navigate challenges presented by #COVID19 w/ their patients. Register at: http://ow.ly/Bo9F50AVuNP	1
403	Org3	Facebook	2020-08-23	#ObesityCareCompetency #3: Demonstrate a working knowledge of the epidemiology of the #ObesityEpidemic. Health care providers can enhance their #OCCs & deliver more effective obesity prevention & management by reading the guide & resources on our site: http://obesitycompetencies.gwu.edu/competencies	1
404	Org3	Facebook	2020-08-20	The doubling in #obesity prevalence between the ages of 6-11 & 20-39 yrs indicates that the transition from childhood to young adulthood is a critical window for obesity prevention & control efforts. Learn more w/ our Excessive Weight Gain Among Young Adults infographic	1
405	Org3	Facebook	2020-08-19	#FastFact: 75% of employers wish to decrease obesity-related costs like healthcare, short-term disability, and absenteeism. They should consider systematic approaches to workplace wellness. Learn more with our “Obesity in the Workplace” fact sheet: http://stop.publichealth.gwu.edu/resources	1
406	Org3	Facebook	2020-08-18	Parents and caregivers – We created a guide with @HealthierGen to help you facilitate conversations with your child about #weight and #health. To explore our resources and practice with scenarios, visit our website at http://WeighInGuide.com	1
407	Org3	Facebook	2020-08-17	Healthcare providers, you may be asking yourself: What are some important considerations I need to know before I talk to my patients about weight?	1
408	Org3	Facebook	2020-08-17	Here's a couple to remember: weight is a personal & often sensitive topic & your words should be productive, not stigmatizing. Be aware of your own attitudes toward #weight & #obesity so that you can compassionately interact w/ patients. Learn more at http://whyweightguide.org	1
409	Org3	Facebook	2020-08-17	retweet The adverse effects of our food system are perpetuated by the #GlobalSyndemic of #obesity, #undernutrition, #climatechange, & now #COVID19. To improve the health of our people & planet, we must design solutions that target all 4 pandemics & break the cycle http://go.gwu.edu/globalsyndemic	1
410	Org3	Facebook	2020-08-17	Survey results indicate that most providers lack knowledge & understanding of recommended #obesity treatments w/ the biggest barriers being lack of time, reimbursement, and lack of knowledge. #ObesityJournal Read it here: https://onlinelibrary.wiley.com/doi/full/10.1002/oby.22142	1
411	Org3	Facebook	2020-08-17	Health Care Providers: If you’re looking to enhance your #ObesityCareCompetencies & deliver more effective obesity prevention and management, visit our website and explore our resources! http://obesitycompetencies.gwu.edu	1
412	Org3	Facebook	2020-08-15	Our #SaturdaySPOTSpotlight of this week is @oaactionallianc ! Tune in to their FREE Lunch and Learn on Obesity and Metabolism in Osteoarthritis on August 19th. Learn more and register here: http://oaaction.unc.edu/webinar/obesity-and-metabolism-in-osteoarthritis-august-19-2020/	1
413	Org3	Facebook	2020-08-13	“US Obesity Epidemic Could Undermine Effectiveness of a Covid-19 Vaccine” @CNN https://cnn.com/2020/08/05/health/obesity-covid-vaccine-effectiveness-wellness/index.html (1/2)	1
414	Org3	Facebook	2020-08-13	The growing prevalence of #obesity worldwide makes the global population even more susceptible to high mortality from infectious disease pandemics like #COVID19. Learn more with our #FastFact sheet: https://stop.publichealth.gwu.edu/sites/stop.publichealth.gwu.edu/files/Infographics/Fast%20Facts/Revised%20Fast%20Facts%207-2020/Obesity%20and%20COVID19.pdf	7	Mortality from Infectious disease pandemics
415	Org3	Facebook	2020-08-13	¿Sabe que ofrecemos la guía de Weigh In en español? Obtiene consejo en hablar con sus hijos de 7 a 11 años de edad sobre el peso y la salud con esta guía: https://stop.publichealth.gwu.edu/sites/stop.publichealth.gwu.edu/files/documents/stopobesityalliance-weighin-spanish.pdf	1
416	Org3	Facebook	2020-08-13	retweet Statement from our own Dr. Dietz on the passing of Sumner M. Redstone: https://redstone.publichealth.gwu.edu/resources/statement-redstone-center-director-william-dietz-death-sumner-m-redstone @STOPObesity @ResilNation @GWpublichealth @GWtweets	1
417	Org3	Facebook	2020-08-12	Want to know the 10 essential competencies that increase the efficacy of obesity prevention and management? Then read our #ObesityCareCompetencies report developed by educators from over 20 organizations and societies! https://obesitycompetencies.gwu.edu/wp-content/uploads/2018/10/Obesity-Care-Competencies.pdf	1
418	Org3	Facebook	2020-08-11	In this video our medical dir @ScottKahan suggests positive ways to discuss lifestyle changes w/ a patient + motivational interviewing techniques. Want tips on productive conversations about weight & health w/ patients? Visit http://whyweightguide.org	1
419	Org3	Facebook	2020-08-10	This past weekend's #SaturdaySTOPSpotlight is on @ObesityCan and their brand new obesity management guidelines! For the very first time, the #ObesityCanadaCPG addresses weight bias and stigma. TY for promoting competent #obesitycare! #healthnotweight https://obesitycanada.ca/cpg/new-canadian-adult-obesity-clinical-practice-guidelines-published-treatment-goals-are-improved-health-and-quality-of-li…	12
420	Org3	Facebook	2020-08-10	8 non-nutritive sweeteners have been approved by the FDA, and while they may be less harmful than sugar in the context of #obesity management, other metabolic effects in humans are unclear. Learn more by reading the Infographic on our site! http://stop.publichealth.gwu.edu/resources	1
421	Org3	Facebook	2020-08-10	Over at @UTSWNews , educators developed a mHealth curriculum that prepares future HCPs to deliver weight management counseling in primary care settings. Learn more about the program and other #ObesityCareCompetencies case studies by visiting: https://obesitycompetencies.gwu.edu/wp-content/uploads/UTSW.pdf	1
422	Org3	Facebook	2020-08-07	This week's #RedstoneReads is @foodbankmetrodc 2020 Hunger Report! "As we assessed this new landscape, we realized that while our external environment has changed dramatically, the need for cohesive information about food security across our region is more important than ever."	1
423	Org3	Facebook	2020-08-07	BC each person requires individualized #obesity treatment, patients need adequate coverage of a wide range of treatment options. Explore each state's Medicaid Programs with our interactive map on our site! http://stop.publichealth.gwu.edu/policy	1
424	Org3	Facebook	2020-08-05	❗Attention Obesity Researchers❗ You are a critical component in reinforcing competent #Obesity prevention & treatment! On our Obesity Competencies site, we offer resources to help support you in your role. Visit http://Obesitycompetencies.gwu.edu & search for articles under “Researchers”	1
425	Org3	Facebook	2020-08-04	#FastFact: Data from the 2019 @HealthyAmerica1 State of Obesity report show a disproportionate distribution of #obesity rates in the US. Read our most recent Fact Sheet on Racial Disparities and Obesity on the Resources tab on our site: http://stop.publichealth.gwu.edu/resources	1
426	Org3	Facebook	2020-08-03	In Bloomington, Indiana @IUSPH undergrads have the option to minor in “Obesity and Health,” a program that educates future health professionals at IU on #ObesityCareCompetencies to apply in their careers. For more OCC case studies, visit: http://go.gwu.edu/compcasestudies	1
427	Org3	Facebook	2020-08-02	When discussing #weight and #health with your child, it is important to know WHAT & HOW to say it. Find helpful resources at http://weighinguide.com - our website specifically designed to support parents and caregivers in these conversations.	1
428	Org3	Facebook	2020-08-01	This week’s #SaturdaySTOPSpotlight is on @OMAsocial ! On Aug 7 and 8 they are hosting a virtual Fundamentals of Obesity Treatment course on “evidence-based approaches for evaluating, diagnosing, & treating obesity in a clinical setting.” Learn more: http://obesitymedicine.org/conferences/fundamentals-of-obesity-treatment/	1
429	Org5	Facebook	2021-01-26	retweet Upcoming seminars of interest from @ObesitySociety Great opportunities to learn more about obesity research or bariatric surgery. Register and learn more here: https://obesity.org/meetings-education/webinars/	11	bariatric surgery
430	Org5	Facebook	2021-01-28	The past year's #ObesityWeek2020 @ObesitySociety Presidential Plenary included a diverse group of brief talks on emerging issues in #obesity https://youtu.be/ujQrPBYxGH8 Must watch: Addressing #healthdisparities @drard 51:34 & Amplifying the #patients voice @JNadglowskiOAC 1:27	1
431	Org5	Facebook	2021-01-28	Join @ASPENWEB for cutting-edge research, evidence-based updates, and virtual networking w/ clinical nutrition experts, all at #ASPEN21! Register by Jan. 31 for best rates. https://bit.ly/3pH2Wma #ASPEN21 #ClinicalNutrition	1
432	Org5	Facebook	2021-01-26	Four Upcoming Webinars from @ObesitySociety ! Heavy check markMedical Management of Bariatric Surgery Patient Heavy check markBariatric Endoscopy Heavy check markOvercoming Methodological Challenges in Obesity Research Heavy check markReducing Error & Strengthening Inferences in Obesity Research Sign up here: https://obesity.org/meetings-education/webinars/	11	Bariatric Surgery
433	Org5	Facebook	2021-01-26	Tuesday TOS Tips: 9 DAYS LEFT until Medical Management of the Metabolic-Bariatric Surgery Patient Webinar. Speakers are Drs. Jonathan Q. Purnell, Carel Le Roux, Caroline Apovian, Fatima C. Stanford & more. Register Today https://obesity.org/meetings-education/webinars/ #FOMO	1
434	Org5	Facebook	2021-01-25	#WhyIAmAMemberMonday TOS Vice President Elizabeth J. Parks, PhD #TOSMembers. Join or renew your membership today! https://bit.ly/2yc1S3r	1
435	Org5	Facebook	2021-01-22	Sign up for Medical Management of the Metabolic-Bariatric Surgery Patient Webinar. Speakers are Drs. Jonathan Q. Purnell, Carel Le Roux, Wendy Brown, Caroline Apovian, Mary-Elizabeth Patti, Philip R. Schauer, Thomas H. Inge & Fatima C. Stanford. Register http://ow.ly/c1Tx50DfXRu	1
436	Org5	Facebook	2021-01-22	Get the latest education on clinical nutrition at @ASPENWEB 's virtual ASPEN 2021 Nutrition Science & Practice Conference, March 20-23, 2021! Register by 1/31 to save $170. Members save more. https://bit.ly/3pH2Wma #ASPEN21	1
437	Org5	Facebook	2021-01-19	We are proud to support the Stop Weight Bias Campaign. We believe that everyone deserves to be treated with dignity and respect, it’s time to end weight discrimination and create a better world for everyone. #bepartofthesolution #stopweightbias http://StopWeightBias.com	12
438	Org5	Facebook	2021-01-18	Watch #WhyIAmAMemberMonday Dr. Tiffany L. Carson #TOSMembers. https://youtube.com/watch?v=j3htZMLn0LY Join or renew your membership today! Rightwards arrow	1
439	Org5	Facebook	2021-01-15	Learning opportunity in February 2021 - @ObesitySociety offers 4 educational webinars with CME Credit - learn more: https://buff.ly/3mMKo24	1
440	Org5	Facebook	2021-01-14	#ObesityJournal Read "Body mass index (BMI) and outcomes of SARS‐CoV‐2 among US veterans"	1
441	Org5	Facebook	2021-01-13	#TOSPressRelease on the wire: "Medication shows promise for weight loss in patients with obesity, diabetes" Read it today! #obesityresearch #obesityscience	11	Weight Loss Medications
442	Org5	Facebook	2021-01-12	Sign up for #TOSWebinar "Medical Management of the Metabolic-Bariatric Surgery Patient" happening Feb. 3. You also get on demand recording access to it. https://obesity.org/meetings-education/webinars/	1
443	Org5	Facebook	2021-01-11	#WhyIAmAMemberMonday Jamy Ard, MD #TOSMembers. Join or renew your membership today! https://bit.ly/2yc1S3r	1
444	Org5	Facebook	2021-01-08	retweet : Obesity Society is offering a series of webinars beginning 3rd February 2021 offering #CME credit! Learn more: @EASOobesity https://buff.ly/3mMKo24	1
445	Org5	Facebook	2021-01-07	We are excited to be a part of developing the NEW #WeightCantWait guide with @STOPObesity ! The guide offers short, accessible, and practical information to support providers in delivering effective #obesity management. http://go.gwu.edu/weightcantwait	1
446	Org5	Facebook	2021-01-05	Tuesday TOS Tips: Check out TOS February #webinars. Register today! #ObesityResearch https://obesity.org/meetings-education/webinars/	1
447	Org5	Facebook	2021-01-04	#WhyIAmAMemberMonday TOS President Catherine Kotz, PhD, FTOS #TOSMembers. Join or renew your membership today! https://bit.ly/2yc1S3r	1
448	Org5	Facebook	2021-01-01	Happy New Year!	1
449	Org5	Facebook	2020-12-24	Happy Holidays!	1
450	Org5	Facebook	2020-12-23	Cardiometabolic Health Congress Presents CMHC Masterclass. CMHC partner with The Obesity Society in delivering 3 masterclass meetings covering NAFLD/NASH epidemic, cardiometabolic risk in pediatric patients & nutrition for the cardiometabolic patient.Visit http://cardiometabolichealth.org	1
451	Org5	Facebook	2020-12-21	Check out the latest research on “Pathways to Severe COVID-19 for People with Obesity” – O’Rourke and Lumeng. Read more in #ObesityJournal. https://onlinelibrary.wiley.com/doi/10.1002/oby.23099 #TOSCOVID-19	7	Severe COVID
452	Org5	Facebook	2020-12-17	Check out the latest research on “Visceral Adiposity Elevates the Risk of Critical Condition in COVID-19: A Systematic Review and Meta-Analysis” - Földi et al. Read more in #ObesityJournal. https://onlinelibrary.wiley.com/doi/10.1002/oby.23096 #TOSCOVID-19	1
453	Org5	Facebook	2020-12-16	"Leading Neuroscience Obesity Researcher Named New TOS President." Read the latest #TOSPressRelease	1
454	Org5	Facebook	2020-12-15	Our friends at The Obesity Society offer a series of webinars beginning 3rd February 2021 with #CME credit! Learn more: @EASOobesity @ObesitySociety https://buff.ly/3mMKo24	1
455	Org5	Facebook	2020-12-15	Last chance TOS 2021 Call for Brief Ideas closes today December 15, 2020. TOS Annual Meeting Program Committee wants to know what you want for next year’s scientific sessions! Submit a brief idea today! #OW2021 https://obesityweek.org/abstracts/abstract-submissions/	1
456	Org5	Facebook	2020-12-10	retweet Join @ObesitySociety for a series of cutting-edge webinars scheduled for February 2021. TOS educational webinars are a great way to gain an in-depth understanding of the essential aspects of obesity and to earn CME credit. Learn more on their website: https://buff.ly/371At39	1
457	Org5	Facebook	2020-12-10	retweet ;Obesity society @ObesitySociety is offering a series of webinars beginning 3rd February 2021 offering #CME credit! Learn more: @EASOobesity https://buff.ly/3mMKo24 is offering a series of webinars beginning 3rd February 2021 offering #CME credit! Learn more: @EASOobesity https://buff.ly/3mMKo24	1
458	Org5	Facebook	2020-12-09	Check out #ObesityJournal article "Upper Paleolithic Figurines Showing Women with Obesity may Represent Survival Symbols of Climatic Change." Read today	1
459	Org5	Facebook	2020-12-07	#ICYMI The Obesity Society 2021 Call for Brief Ideas closes December 15, 2020. TOS Annual Meeting Program Committee wants to know what you want for next year’s scientific sessions! Submit your ideas today! #OW2021 https://obesityweek.org/abstracts/abstract-submissions/	1
460	Org5	Facebook	2020-12-04	#ObesityJournal is feature in The New York Times. Read the article today!	1
461	Org5	Facebook	2020-12-04	#TOSWebinarsAlert: Generating and Interpreting Evidence about Effects in Obesity Research: Reducing Error and Strengthening Inferences February 25, 2021 CME credits: 6 Register today! https://obesity.org/meetings-education/webinars/	1
462	Org5	Facebook	2020-12-03	Reminder The Obesity Society 2021 Call for Brief Ideas closes December 15, 2020. TOS Annual Meeting Program Committee wants to know what you want for next year’s scientific sessions! Submit your ideas today! https://obesityweek.org/abstracts/abstract-submissions/ #OW2021	1
463	Org5	Facebook	2020-12-02	#TOSWebinarsAlert: Overcoming Methodological Challenges in Obesity Research February 23, 2021 CME credits: 3.5 Register today! https://obesity.org/meetings-education/webinars/	1
464	Org5	Facebook	2020-11-27	retweet Why is Bariatric Surgery So Effective? Dr Lee Kaplan discusses the role of the gastrointestinal tract & gut microbiota in the mechanism of action of #bariatricsurgery. Register here: https://bit.ly/ObesitySeries20 #ShareScience #Obesity #PhDChat #Webinar @ObesitySociety @APSPhysiology	11	Bariatric Surgery
465	Org5	Facebook	2020-11-30	Read "Difference in Housing Temperature‐Induced Energy Expenditure Elicits Sex‐Specific Diet‐Induced Metabolic Adaptations in Mice" in #ObesityJournal today! https://onlinelibrary.wiley.com/doi/10.1002/oby.22925	1
466	Org5	Facebook	2020-11-25	The Obesity Society 2021 Call for Brief Ideas closes December 15, 2020. TOS Annual Meeting Program Committee wants to know what you want for next year’s scientific sessions! Submit your ideas today! https://obesityweek.org/abstracts/abstract-submissions/ #OW2021	1
467	Org5	Facebook	2020-11-24	Read "Loss of Uncoupling Protein 3 Attenuates Western Diet–Induced Obesity, Systemic Inflammation, and Insulin Resistance in Rats" in #ObesityJournal today! https://onlinelibrary.wiley.com/doi/10.1002/oby.22879	1
468	Org5	Facebook	2020-11-19	#TOSWebinarsAlert: Medical Management of the Metabolic-Bariatric Surgery Patient Wednesday, February 3, 2021 Earn 6.25 CME credits Register today! https://obesity.org/meetings-education/webinars/	1
469	Org5	Facebook	2020-11-18	Read "Semaglutide 2.4 mg for the Treatment of Obesity: Key Elements of the STEP Trials 1 to 5" in the #ObesityJournal today! https://onlinelibrary.wiley.com/doi/10.1002/oby.22794	1
470	Org5	Facebook	2020-11-15	In his @ObesitySociety piece, our Dr. Dietz compares #obesity as a risk factor for #COVID19 morbidity/mortality and to the H1N1 influenza. Read it at: https://onlinelibrary.wiley.com/doi/full/10.1002/oby.22818	7	COVID-19 mortality/morbidity
471	Org5	Facebook	2020-11-16	Read #ObesityJournal "Special Issue: Abstracts from the 38th Annual Meeting of the Obesity Society at Obesityweek® Interactive November 2–6, 2020" #obesityresearch	1
472	Org5	Facebook	2020-11-14	#WorldDiabetesDay Watch Dr. George Bray talked about obesity and diabetes. #diabetesawarenessmonth	1
473	Org5	Facebook	2020-11-12	retweet Congratulations to #UBuffalo PhD student Amanda Crandall, on her win for the @ObesitySociety Ethan Sims Young Investigator award. This is one of the most prestigious awards in our field recognizing the achievements of PhD students and post-docs who are considered rising stars!	1
474	Org5	Facebook	2020-11-12	Read the virtual issue of COVID-19 and Obesity. #ObesityJournal https://onlinelibrary.wiley.com/doi/toc/10.1002/(ISSN)1930-739x.Covid-19-obesity?	1
475	Org5	Facebook	2020-11-09	Check out this special issue in #ObesityJournal Circadian Clocks and Metabolic Health	1
476	Org5	Facebook	2020-11-07	Thank you everyone for attending ObesityWeek® Interactive! #OW2020	1
477	Org5	Facebook	2020-11-06	Thank you to @ObesitySociety and @AmerAcadPed for hosting such a powerful joint symposium yesterday at #OW2020 about considering bariatric surgery for adolescents, which is just one tool on the continuum of care for #obesity treatment.	11	Bariatric Surgery
478	Org5	Facebook	2020-11-06	#OW2020 Today at 2:30pm-4:00pm ET on channel 2 check out: TOS/SGIM/OMA Joint Symposium: Obesity Treatment in Primary Care Settings: Overview of Research and Current Practice Today	1
479	Org5	Facebook	2020-11-06	The U.S. adult #obesity rate has surpassed 40%. To help address this important issue, we worked with @STOPObesity on the NEW #WeightCantWait guide to provide short, accessible and practical information on effective #obesity management. http://go.gwu.edu/weightcantweight	1
480	Org5	Facebook	2020-11-06	retweet Join me for the "Obesity Policy Engagement Network (OPEN): Disease Recognition - Does It Make a Difference?" Looking forward to learn from leaders from around the world! #OPENObesity #OW2020 @ObesitySociety @WorldObesity	1
481	Org5	Facebook	2020-11-06	retweet Register to hear @askdrfatima @_MiguelHernan @mendel_random @haileybanack Steve Heymsfield, Susan Murphy, this Feb. @ObesitySociety @NORCcentral #epitwitter https://eventbrite.com/e/overcoming-methodological-challenges-in-obesity-research-webinar-tickets-124685691259?utm-medium=discovery&utm-campaign=social&utm-content=attendeeshare&aff=estw&utm-source=tw&utm-term=listing @Eventbrite	1
482	Org5	Facebook	2020-11-05	#OW2020 Roundtable "Body Positivity and Approaching Overweight and Obesity as a Medical Diagnosis" Starting November 5, 2020 4:00 pm	1
483	Org5	Facebook	2020-11-05	Early Career Investigators check out #OW2020 Roundtable: "Early Career Conversation with Dr. Penny Gordon Larsen.” 11/5 at 3:30pm ET #mentorship	1
484	Org5	Facebook	2020-11-05	Roundtable check out "5 things I wish I had known when I started my new Assistant Professor tenure track position with Alisha Redelfs" Starting November 5, 2020 2:30 pm #OW2020	1
485	Org5	Facebook	2020-11-05	retweet We're so proud that our Chief Medical Officer Florencia Halperin, MD, MMSc was invited to share the effectiveness of our program at @obesitysociety 's @ObesityWeek Interactive 2020. Here’s an up-close and personal look at the research: https://bit.ly/3esqExg #OW2020 #ObesityWeek	1
486	Org5	Facebook	2020-11-05	#OW2020 Implementation Science in Obesity Research: Q&A Roundtable Discussion 11/6/2020 10:30 AM ET @ObesitySociety https://twitter.com/ObesityWeek	1
487	Org5	Facebook	2020-11-05	Check out #OW2020Roundtable: Developing or Transitioning Remote Behavioral Interventions During COVID19 Starting November 5, 2020 2:00 pm ET #OW2020	1
488	Org5	Facebook	2020-11-05	#OW2020 Thursday, Nov. 5 at 2:30pm ET Don't miss the Obesity Journal Symposium featuring winning papers that provide the latest insights into preventing and treating obesity through innovative research designs!	1
489	Org5	Facebook	2020-11-05	Check out Roundtable "Sleep Obesity Paradigm" 11/5/20 at 1PM EST #OW2020	1
490	Org5	Facebook	2020-11-05	#OWRoundtableAlert: "Weight Stigma Research hosted by Drs Angela Alberga and Kate Bauer" Starting November 5, 2020 12:00 pm ET. #OW2020	1
491	Org5	Facebook	2020-11-04	retweet Come join us tomorrow 11/5 at 3:30pm EST #OW2020 roundtable @ObesitySociety #mentorship	1
492	Org5	Facebook	2020-11-04	retwet #OWRoundtable Check out "Weight Stigma and Patient Care" Starting November 4, 2020, 5:00 pm ET #OW2020	1
493	Org5	Facebook	2020-11-04	retweet Early Career Investigators at #OW2020: There will be a roundtable titled, "Early Career Conversation w Dr. @P_Gordon_Larsen and it will be held tomorrow, 11/5 at 3:30pm EST. Dr. Gordon-Larsen is a past President of @ObesitySociety & a wonderful advocate for early career folks.	1
494	Org5	Facebook	2020-11-04	Check out #OW2020 Roundtable Texas Obesity Policy Efforts - join to discuss policy strategies and research-to-policy efforts in Texas Starting November 4, 2020 at 1:00 pm ET	1
495	Org5	Facebook	2020-11-04	Check out #OW2020 Roundtable: "Transitioning to Industry from Academia or Clinical Practice What its like crossing to the other side with Dr Nadia Ahmad" Starting November 4, 2020 at 12:30 pm ET #mentorship	1
496	Org5	Facebook	2020-11-04	#OW2020 Roundtable Are you junior faculty and anxious about the academic promotions process bring your questions for informal discussion with a physician-scientist. Nov. 4 11am ET	1
497	Org5	Facebook	2020-11-04	TOS Membership Directory check it out! Rem	1
498	Org5	Facebook	2020-11-04	Congrats to all the #OW2020 Award recipients!	1
499	Org5	Facebook	2020-11-04	Check out #OW2020 Roundtable: "Obesity in the Middle East and Lessons Learned" scheduled for Nov. 4 at 8 am ET. You still have time to register for #OW2020 to see live sessions & catch up on sessions you missed in our on demand section! Rightwards arrowhttp://obesityweek.org	1
500	Org5	Facebook	2020-11-03	Join the 2020 Ethan Sims Young Investigator Award finalists as they present their oral abstracts and compete! You still have time to register for #OW2020 & see live sessions as well as catch up on sessions you missed in our on demand section! Go to https://obesityweek.org	1
501	Org5	Facebook	2020-11-03	#OW2020 Roundtable: "Nutrition Care for Hospitalized Patients with COVID-19 and Obesity" scheduled for Nov 3. at 2 pm ET. #FOMO You still have time to register for #OW2020 to see live sessions & catch up on sessions you missed in our on demand section! Rightwards arrowhttps://obesityweek.org	1
502	Org5	Facebook	2020-11-03	Today at 1pm ET #OW2020 Roundtable "Dealing with our patients environments during telehealth encounters." You still have time to register for #OW2020 to see live sessions & catch up on sessions you missed in our on demand section! Rightwards arrowhttps://obesityweek.org	1
503	Org5	Facebook	2020-11-03	#OW2020 Roundtable Setting up a successful Medically Supervised Weight loss Program to compliment an existing bariatric surgery practice. You still have time to register to see live sessions & catch up on sessions you missed in our ondemand section! Rightwards arrowhttps://obesityweek.org	1
504	Org5	Facebook	2020-11-03	An Important message from TOS President Dr. Lee Kaplan https://youtube.com/watch?v=ZVbLDE-PxKM #vote2020	1
505	Org5	Facebook	2020-11-03	Join today from 9:00am-10:30am ET TOS Early Career Academic Workshop Early Career During a Pandemic: From Surviving to Success You still have time to register for #OW2020 see live sessions & catch up on sessions you missed in our on demand section! Go to https://obesityweek.org	1
506	Org5	Facebook	2020-11-02	retweet At #ObesityWeek2020, I will be speaking at the Early Career Academic Workshop on Tuesday, November 3rd w @katewbauer on Channel 2. The title is, "Early Career During a Pandemic: From Surviving to Success" $35 for students to attend the conference! #WomenInSTEMM @ObesitySociety	1
507	Org5	Facebook	2020-11-02	retweet ICYMI: “Aside from the virtual move, this is also an opportunity for us to reengage as a society anew." @ObesitySociety @ObesityWeek #OW2020	1
508	Org5	Facebook	2020-11-02	retweet #ObesityWeek is here! Party popper Join @ObesitySociety and connect with colleagues across the world this #OW2020. Stay tuned tomorrow too for our joint symposium! Rightwards arrow Remember, there is still time to register and check out the programme here: https://obesityweek.org	1
509	Org5	Facebook	2020-11-02	retweet Last year it took me 25 hours to get from Tollarp, Sweden to Las Vegas, USA for @ObesitySociety #ObesityWeek This year it will take me, less than a minute to click on a link. I am ready! @ObesityCan @EASOobesity @WorldObesity @ObesityAction #differentworld #COVID19 #OW2020	1
510	Org5	Facebook	2020-11-02	retweet Professor Lee Kaplan @MassGeneralNews @ObesityWeek @ObesitySociety has been studying the control of metabolism and peptide biology for 3 decades. Watch his Presidential address on the current status of #Obesity Medicine #Precisionmedicine today #OW2020	1
511	Org5	Facebook	2020-11-02	Today starts OBESITYWEEK® INTERACTIVE! All week long remember to use #OW2020 in your posts and tag us! #FOMO you still have time to register for #OW2020 & see live sessions as well as catch up on sessions you missed in our on demand section! Go to https://obesityweek.org	1
512	Org5	Facebook	2020-10-30	Tuesday, November 10, 12-2pm the Partnership for a Healthy Texas will host a virtual briefing for lawmakers, their staff, and other external stakeholders. Sign up here https://zoom.us/meeting/register/tJIlfuiqrj0jHdR4TtQOHv7rBFCcWC9Ko15M%C2%A0	1
513	Org5	Facebook	2020-10-30	ObesityWeek® Interactive symposium "Covid and Obesity Cross -Links: From Biology to Clinical Care" REMINDER : You still have time today to register for #OW2020 at https://obesityweek.org	1
514	Org5	Facebook	2020-10-29	Watch Barbara Cady talk about her ObesityWeek® Interactive joint symposium "TOS/OC/OAC/TOPS/EASO Joint Symposium: Walking in Their Shoes - A Patient Perspective" https://youtube.com/watch?v=62Kw6jWuHag REMINDER to register for #OW2020 today at	1
515	Org5	Facebook	2020-10-29	retweet Obesity Researchers - please reach out to @MichelleCardel if you are interested in science communication in obesity @ObesitySociety Quote Tweet	1
516	Org5	Facebook	2020-10-29	retweet Register and join the conversation at #ObesityWeek® Interactive - an online event November 2-6th. https://buff.ly/3nRtOz9 @EASOobesity	1
517	Org5	Facebook	2020-10-28	Sneak Peak of ObesityWeek Interactive. Registrants will get early access Friday, October 30 to set up personal profiles. Content goes live Monday, November 2nd. There's still time to register at http://obesityweek.org. #OW2020	1
518	Org5	Facebook	2020-10-28	Watch Dr. Gretchen Ames talk about her ObesityWeek® Interactive session "Becoming the Patient Whisperer - Addressing Challenging Topics in Weight Management With Your Patients" https://youtube.com/watch?v=j5hEJSXcDzU REMINDER to register for #OW2020 today at	1
519	Org5	Facebook	2020-10-28	retweet Calling all PhD students & post docs studying factors related to obesity. I am the communications chair for @ObesitySociety and am putting together a list of early career folks who want experience in Science communication and talking to the media. If this is you, PM me. #obesity	1
520	Org5	Facebook	2020-10-27	retweet 2020 goes interactive - scientists from across the globe will present the latest research in obesity science and medicine & related topics at the 38th Annual Meeting of @ObesitySociety ObesityWeek Interactive (Nov 2–6) http://obesityweek.org http://tinyurl.com/y6g4oyky	1
521	Org5	Facebook	2020-10-27	Watch Dr. Karen Lee talk about her ObesityWeek® Interactive session "Beyond Obesity - Impacts of Physical Activity Among Families" https://youtube.com/watch?v=RkEqiq7-T2E REMINDER Register for #OW2020 today at	1
522	Org5	Facebook	2020-10-27	Check out the latest research on “Is Growth Hormone Insufficiency the Missing Link Between Obesity, Male Gender, Age and COVID-19 Severity?” – Lubrano et. al. Read more in #ObesityJournal. https://onlinelibrary.wiley.com/doi/10.1002/oby.23000 #TOSCOVID-19	7	COVID-19 Hospitalization
523	Org5	Facebook	2020-10-26	Watch Dr. Buscemi talk about her ObesityWeek® Interactive joint symposium "TOS/SBM/OAC Joint Symposium The Art of Advocacy - How Can Each of Us Promote Policy to Improve Obesity Treatment & Prevention" https://youtube.com/watch?v=Co082q_TUZU Register for #OW2020 today at	1
524	Org5	Facebook	2020-10-23	Watch Dr. Angela Fitch talk about her ObesityWeek® Interactive joint symposium "TOS/SGIM/OMA Joint Symposium: Obesity Treatment in Primary Care Settings: Overview of Research and Current Practice" https://youtube.com/watch?v=jQe9Z-V3wjE Register for #OW2020 today at	1
525	Org5	Facebook	2020-10-22	Watch Dr. Claudia Hunot talk about her ObesityWeek® Interactive poster "Patterns of Appetitive Traits and BMI in Mother-Child Dyads in Mexico" https://youtube.com/watch?v=H2PGM7_IGXY REMINDER Register for #OW2020 today at	1
526	Org5	Facebook	2020-10-22	retweet Join us at our joint symposium with @ObesitySociety @obesitycan @ObesityAction @TOPSWeightLoss @EASOobesity to discuss patient perspectives in obesity care with @scottkahan @DrGoodpaster @BariatricFoodie @BarbCTOPS	1
527	Org5	Facebook	2020-10-22	retweet Happy to see our paper finding that participants engaged in health‐related research perceive COVID19 as a significant threat, affecting mental health, desire to participate in research, & ability to adhere to intervention recommendations. @ObesitySociety https://onlinelibrary.wiley.com/doi/10.1002/oby.23016	1
528	Org5	Facebook	2020-10-22	Check out the latest research on “Obesity Doubles Mortality in Patients Hospitalized for SARS-CoV-2 in Paris Hospitals, France: A Cohort Study on 5,795 Patients” – Czernichow et. al . Read more in #ObesityJournal. https://onlinelibrary.wiley.com/doi/10.1002/oby.23014 #TOSCOVID-19	7	COVID-19 Hospitalization
529	Org5	Facebook	2020-10-22	#Reminder ObesityWeek registration is open! #OW2020 Register today at http://obesityweek.org	1
530	Org5	Facebook	2020-10-20	retweet If you haven’t already done so, be sure to join the nearly 2000 of your peers who have already registered for #ObesityWeek November 2 - 6	1
531	Org5	Facebook	2020-10-20	Watch Dr. Rena R. Wing talk about her ObesityWeek® Interactive session "2020 Friends of Albert (Mikey) Stunkard Lifetime Achievement Award Presentation" https://youtube.com/watch?v=V4zGKg2mHcY REMINDER Register for #OW2020 today at	1
532	Org5	Facebook	2020-10-20	Check out the latest research on “What COVID-19 is Teaching Us About Counseling for Weight Management” – Kushner. Read more in #ObesityJournal. https://onlinelibrary.wiley.com/doi/10.1002/oby.22988 #TOSCOVID-19	1
533	Org5	Facebook	2020-10-19	Watch Dafna Pachter talk about her ObesityWeek® Interactive poster "Obesity Management in Times of COVID-19 Restrictions Patient Survey in Center Offering Telemedicine" https://youtube.com/watch?v=NJbvfx7ywNA Register for #OW2020 today at	1
534	Org5	Facebook	2020-10-16	Watch Dr. Edna J. Nava Gonzalez talk about her ObesityWeek® Interactive poster "TOS Poster: Perceived Changes in Diet Quality and BMI in Mexico Before and During the COVID-19 Quarantine" https://youtube.com/watch?v=sg7wTKd6wt4 Register for #OW2020 at	1
535	Org5	Facebook	2020-10-15	Read the latest #TOSPressRelease "Oral, Poster Abstracts Take Center Stage at ObesityWeek® Interactive" #OW2020	1
536	Org5	Facebook	2020-10-15	Watch Dr. Manal. F. Abdelmalek talk about her ObesityWeek® Interactive session "Presidential Plenary: NASH and the Importance of Treating Obesity" https://youtube.com/watch?v=Npvv6u_kmog Register for #OW2020 at	1
537	Org5	Facebook	2020-10-14	Check out the latest research on “Food Insecurity, the Home Food Environment, and Parent Feeding Practices in the Era of COVID-19” – Adams et. al. Read more in #ObesityJournal. https://onlinelibrary.wiley.com/doi/10.1002/oby.22996 #TOSCOVID-19	1
538	Org5	Facebook	2020-10-14	Check out the latest research on "Visceral Adiposity and High Intramuscular Fat Deposition Independently Predict Critical Illness in Patients with Sars-COV-2" – Yang et. al. Read more in #ObesityJournal. https://onlinelibrary.wiley.com/doi/10.1002/oby.22971 #TOSCOVID-19	7	COVID-19 Hospitalization
539	Org5	Facebook	2020-10-13	Tuesday TOS Tips: Watch Dr. Wagner Prado talk about his ObesityWeek® Interactive session "Cardiovascular Effects of Self-Selected Exercise Intensity in youth with Obesity: A RCT" https://youtu.be/V8mnoUTKKVM Register for #OW2020	1
540	Org5	Facebook	2020-10-13	Many thanks to the @eatrightPRO @WtMgmtDPG for honoring me and @DrRobertKushner as "respected professionals whose work has enhanced the field of weight management and who have been a consistent supporters of RDNs and the DPG. It's a privilege to keep such good company.	1
541	Org5	Facebook	2020-10-12	retweet Did you know that #ObesityWeek registration is open? Thinking face Mark your calendars now for ObesityWeek Interactive, coming November 2–6, 2020. Rightwards arrow Register today: http://obesityweek.org #ObesityWeekisHappening #ObesityWeek2020 @ObesitySociety @ObesityWeek	1
542	Org5	Facebook	2020-10-12	Watch Dr. Joanna MacEwan talk about her ObesityWeek® Interactive session "The Impact of Obesity on Employment and Productivity in Working Age Adults in the United States" https://youtu.be/QvoxVKkv8QA #OW2020	1
543	Org5	Facebook	2020-10-08	retweet Have you read the @ObesitySociety research written by our Dr. Dietz and @csantosburgoaz on “#Obesity and its Implications for #COVID19 Mortality”? Find it at: https://onlinelibrary.wiley.com/doi/full/10.1002/oby.22818	1
544	Org5	Facebook	2020-10-07	Watch Dr. Giles Yeo talk about his ObesityWeek® key lecturer "Key Lecturer Giles Yeo: Genetics of Obesity" https://youtu.be/AhRpn19W0Po via @YouTube	5	Family inheritance and influences
545	Org5	Facebook	2020-10-07	Check out the latest research on "The Potential Benefit of Telmisartan to Protect Overweight COPD Patients from the Acquisition of COVID-19" – Kow and Hasan. Read more in #ObesityJournal. https://onlinelibrary.wiley.com/doi/10.1002/oby.22976 #TOSCOVID-19	1
546	Org5	Facebook	2020-10-06	#Reminder the National Minority Quality Forum will be holding a session tomorrow at 8:30am ET, on obesity in communities of color and ways to address health disparities. More info: https://nmqf.org/nmqf-events/2020annualsummit Register here	1
547	Org5	Facebook	2020-10-06	retweet Just registered for #OW2020 can’t wait to join virtually!! @ObesityWeek @ObesitySociety	1
548	Org5	Facebook	2020-10-06	retweet Looking forward to #OW2020 as a first-timer!	1
549	Org5	Facebook	2020-10-05	Malnourished hospitalized patients are associated with longer stays, higher medical costs, and increased mortality. Learn how to intervene during #MAW2020! https://bit.ly/1FPF1CR	1
550	Org5	Facebook	2020-10-02	Did you know malnutrition is highest with older adults? Help put a spotlight on malnutrition and the negative impact it has on all. Join us for ASPEN Malnutrition Awareness Week, Oct. 5-9, 2020. https://bit.ly/1FPF1CR #MAW2020	1
551	Org5	Facebook	2020-10-01	#Reminder ObesityWeek registration is open! #OW2020 Register today at http://obesityweek.org	1
552	Org5	Facebook	2020-09-30	#ObesityResearch Check out the special #ObesityJournal free issue Circadian Clocks and Metabolic Health. The link to the full issue is:	1
553	Org5	Facebook	2020-09-29	So happy that our work was chosen as one of the 4 papers selected to be featured at the 8th annual Obesity Journal Symposium at @ObesitySociety ’s ObesityWeek. This session will take place on Channel 2 from 2:30 p.m. to 4 p.m. (ET) on Nov. 5, 2020, at http://obesityweek.org.	1
554	Org5	Facebook	2020-09-29	retweet TOTALLY missing the chance to see all my conference friends in person, but excited for @ObesitySociety @ObesityWeek #Interactive Nov 2-6 and a chance to share the #dietitian perspective in an interdisciplinary case study panel #ThereisNoIinTeam #OW2020	1
555	Org5	Facebook	2020-09-29	Tuesday TOS Tips: Learn the 5-2-1-0 tips for healthy eating and exercise for children. #NationalChildhoodObesityAwarenessMonth http://ow.ly/d/7VqT	1
556	Org5	Facebook	2020-09-28	Get the facts on #COVID-19 and #obesity. Artists are using their voices to remind us that we’re all in this together, and help is out there. Watch the PSA by @TheCreativeC and learn more:	1
557	Org5	Facebook	2020-09-24	retweet Want to learn more about multi-level, cross-sectional, science-based strategies to address obesity? Register now for #OW2020	1
558	Org5	Facebook	2020-09-24	retweet Want to hear about cutting-edge science, education, & clinical work related to obesity? If so, join us at ObesityWeek, a fully virtual and interactive conference from @ObesitySociety happening November 2-6. Students only $35. Presentations available to view till 12/31/20. #OW2020	1
559	Org5	Facebook	2020-09-23	Every 60 seconds, 11 hospitalized patients go undiagnosed with malnutrition. Learn how to intervene during Malnutrition Awareness Week, Oct. 5-9, 2020. https://bit.ly/1FPF1CR #MAW2020	1
560	Org5	Facebook	2020-09-22	Tuesday TOS Tips: Remember you have until Oct. 5th to vote in the 2020 TOS council and nominating committee election. Renew or become a member today! #TOSMembers https://obesity.org/membership/	1
561	Org5	Facebook	2020-09-19	ObesityWeek registration is open! Register today at http://obesityweek.org #OW2020	1
562	Org5	Facebook	2020-09-14	#ObesityWebinar World Obesity Live - The time is now: action on obesity in the time of COVID-19 | World Obesity Federation. Register here: https://worldobesity.org/training-and-events/events/world-obesity-live-the-time-is-now-action-on-obesity-in-the-time-of-covid-19	1
563	Org5	Facebook	2020-09-10	ObesityWeek registration is now open! Register by September 30 for early bird rates.	1
564	Org5	Facebook	2020-09-03	Mark your calendar - registration opens the week of September 8! Early bird rates available through September 30. Go to http://obesityweek.org for more details.	1
565	Org5	Facebook	2020-09-02	Another great day of presentations here at #ECOICO2020! @EASOobesity and our partners thank you for joining us. Missed something? Remember the sessions are available on-demand for 3 months! https://buff.ly/34PKU9l	1
566	Org5	Facebook	2020-09-02	retweet Join the #Childhood #Obesity Teaching Course at 4:30pm CET led by Jennifer L Baker and @JC_Holm @EASOobesity #COTF co-chairs #ECOICO2020	1
567	Org5	Facebook	2020-09-01	Tuesday Tips from TOS: September is #NationalChildhoodObesityAwarenessMonth. Learn tips on how to pack a healthy lunch for your children. Read TOS patient pages http://ow.ly/d/7VDr	1
568	Org5	Facebook	2020-09-01	retweet Thanks @AbdTahrani Remember everyone - It’s not too late to register for #ECOICO2020 & access all the #obesity related scientific and clinical training content for 3 weeks on demand. http://ecoico2020.com	1
569	Org5	Facebook	2020-08-26	"Initiative to Advance the Careers of Researchers from Groups Underrepresented in Academia" *FREE* seminars. Open to all. @UABNORC Register here https://uab.edu/norc/education-enrichment/norc-minority-symposium/norc-minority-symposium-schedule?j=577422&sfmc_sub=103336318&l=218955_HTML&u=13674542&mid=100020799&jb=1	1
570	Org5	Facebook	2020-09-24	retweet On behalf of @fstanfordmd @DrTiffanyCarson & all NIH-funded NORCS, we are thrilled to announce our @NIH -sponsored, "Initiative to Advance the Careers of Researchers from Groups Underrepresented in Academia" *FREE* seminars. Open to all. Registration here: https://uab.edu/norc/education-enrichment/norc-minority-symposium/norc-minority-symposium-schedule?j=577422&sfmc_sub=103336318&l=21895…	1
571	Org5	Facebook	2020-08-24	Do you have an #obesity or #nutrition product, service, technology, or scientific innovation you want to present? Contact us about corporate sponsored symposia opportunities! CME or Non-CME options available. #OW2020 #research #ObesityWeek2020 #ObesityWeekIsHappening	1
572	Org5	Facebook	2020-09-25	#ObesityWebinar “A Call to Action in Addressing Obesity in Communities of Color: A Closer Look at Existing Disparities That Have Been Magnified in the Age of COVID-19” @fstanfordmd @NMQF is hosting the webinar from 12 to 1pm ET on Aug. 28, 2020. Register https://events.r20.constantcontact.com/register/eventReg?oeidk=a07eh9iz0ag1d209d77&oseq=&c=&ch=	1
573	Org5	Facebook	2020-08-25	TOS Press Release on Wire: New research shows that an intensive lifestyle intervention aimed at weight loss lowered incidence of obesity-related cancers in adults with overweight or obesity and type 2 diabetes published online in #ObesityJournal.	7	Obesity-related cancer
574	Org5	Facebook	2020-08-24	Check out the latest research on Check out the latest research on "COVID-19 Rise in Younger Adults with Obesity: Visceral Adiposity Can Predict the Risk"— Iacobellis et. al. Read more in #ObesityJournal. #TOSCOVID-19	7	COVID-19 Hospitalization
575	Org5	Facebook	2020-08-24	retweet Thanks to @ObesitySociety for your support! Explore the online program and register today http://ecoico2020.com	1
576	Org5	Facebook	2020-08-20	Check out the latest research on Check out the latest research on "Angiotensin-(1-7) and Obesity: Role of Cardiorespiratory Fitness and COVID-19 Implications" — Motta-Santos et. al. Read more in #ObesityJournal. #TOSCOVID-19	1
577	Org5	Facebook	2020-08-17	Check out the latest research on "COVID-19, Obesity and Undernutrition: A Major Challenge for Latin American Countries" — Cuevas and Barquera. Read more in #ObesityJournal. #TOSCOVID-19	1
578	Org5	Facebook	2020-08-14	Less than 2 weeks to go! Join us online for #ECOICO2020. This year, Europe’s top #obesity meeting is held in collaboration with @WorldObesity and @ASOIreland	1
579	Org5	Facebook	2020-08-13	Check out the latest research on "How Much May COVID-19 School Closures Increase Childhood Obesity" — Workman . Read more in #ObesityJournal. #TOSCOVID-19	5	school closure due to covid
580	Org5	Facebook	2020-08-11	Check out the latest research on "Is BMI Higher in Younger Patients with COVID-19? Association Between BMI and COVID-19 Hospitalization by Age" — Bhasin et. al. Read more in #ObesityJournal. #TOSCOVID-19	7	COVID-19 Hospitalization
581	Org5	Facebook	2020-08-06	Check out the latest research on "The Association Between Obesity, Type 2 Diabetes and Hypertension with Severe COVID-19 on Admission Among Mexicans" – Denova-Gutiérrez et. al . Read more in #ObesityJournal. #TOSCOVID-19	7	COVID-19 Hospitalization
582	Org5	Facebook	2020-08-04	TOS on the Wire: African American BMi associated with severe COVID-19 and ICU admission. Read more https://eurekalert.org/pub_releases/2020-08/tos-aab072820.php #COVID-19 #ObesityJournal	7	COVID-19 Hospitalization
583	Org5	Facebook	2020-08-03	#MotivationMonday Last chance to submit TOS #OW2020 Late-Breaking abstracts. Call for TOS Late-Breaking Abstracts closes Aug. 5th. Submit your #Obesity #research! https://obesityweek.org/abstracts/ #ObesityWeek2020 #ObesityWeekIsHappening	1
584	Org6	Twitter	2021-01-31	Learn about the candidates for the 2021 national ballot! Voting begins Monday, February 1st! Ballot box with ballot⁠ http://eatright.org/election⁠ ⁠ #eatrightPRO #eatwellMD #rddaily #rdchat #eatright #diversifydietetics #yourvoicecounts	1
585	Org6	Twitter	2021-01-31	Have you entered the Academy's #RDNday Contest? The winner will be featured in New York's Times Square, in Eat Right Weekly and affiliate newsletters, on the Academy website and social media. CityscapeStar-struck Enter by February 5: https://sm.eatright.org/RDNdaycontest #NationalNutritionMonth #eatrightPRO	1
586	Org6	Twitter	2021-01-30	LAST CALL! Cheering megaphone The Academy Foundation's application for awards, research grants and fellowships closes February 1, 2021, at 11:59 pm CT. Hourglass with flowing sand Learn more about the open applications and eligibility requirements: https://sm.eatright.org/FoundationAppPortal #eatrightPRO #rdchat #dietetics	1
587	Org6	Twitter	2021-01-29	Our webinars provide #nutrition and #dietetics professionals with opportunities to earn CPEUs while learning about hot trends, important updates and the latest research in the field. Nerd facePersonal computer Check out the many topics covered: https://sm.eatright.org/webinars #eatrightPRO #RDNCPE	1
588	Org6	Twitter	2021-01-29	Did you know January is #NationalMentoringMonth? What a great time to join the Academy's Mentor Match Program! Smiling face with open mouth and smiling eyesRaising handsHandshake Log in to learn more and sign up as a #mentor, mentee or both: https://sm.eatright.org/mentor #eatrightPRO #mentoring #dietetics	1
589	Org6	Twitter	2021-01-29	Are you ready to vote in the Academy's 2021 national election? Be sure your voice is heard! Ballot box with ballotBallot box with check Review candidates and plan to cast your ballot starting Monday, February 1: https://sm.eatright.org/election #eatrightPRO #dietetics #rdchat	1
590	Org6	Twitter	2021-01-29	Given to support volunteer groups engaged in projects and programs of #nutrition education for the public, the LuLu G. Graves Nutrition Education Award offers up to $1,000 each. Learn about this and more #eatrightPRO Foundation awards and apply by Feb. 1: https://sm.eatright.org/recawards	1
591	Org6	Twitter	2021-01-29	retweet @eatrightpro members: Help shape the future of the Academy by exercising your member privilege to vote in the 2021 national election, taking place from February 1 to 15.	1
592	Org6	Twitter	2021-01-29	The Lenora Moragne Memorial Award provides financial support to a master-preferred dietetics educator or preceptor enrolled in a doctoral study program with an interest in public policy and nutrition. Sound like you? Learn more and apply: https://sm.eatright.org/schlrshps #eatrightPRO	1
593	Org6	Twitter	2021-01-29	Gain the knowledge and skills needed to develop and deliver all types of communication in a variety of settings. This authoritative guide (all 42 chapters worth) will be a help to you all along the way! Open book Learn more: https://sm.eatright.org/communicatingnutritionprint #eatrightPRO #RDN #NDTR #futureRDN	1
594	Org6	Twitter	2021-01-28	If you weren't able to attend #FNCE last year, now you can catch up on what you missed! View the 2020 sessions in the eatrightSTORE: https://sm.eatright.org/FNCESessionsStore #eatrightPRO #CPE #RDN #NDTR #RDCPE	1
595	Org6	Twitter	2021-01-28	Voting for the Academy's National Election starts Monday, February 1. Ballot box with ballot Get to know the candidates by reading their bios: https://sm.eatright.org/electionbios #eatrightPRO #RDN #RDchat	1
596	Org6	Twitter	2021-01-28	Are you conducting nutrition and dietetics research or in search of funding? Consider applying for an Academy Foundation research grant! Apply by February 1, 2021: https://sm.eatright.org/Foundationportal #eatrightPRO	1
597	Org6	Twitter	2021-01-28	The Diabetes DPG is hosting its virtual symposium Feb 19 - 21. Refresh and grow your knowledge in the area of #diabetes through expert presentations, networking and more! Learn more about the sessions and register: https://sm.eatright.org/DDPG2021symposium #eatrightPRO #DDPG	1
598	Org6	Twitter	2021-01-28	Now is the perfect time to set up a setting up a monthly recurring donation to the Academy Foundation, which provides year-round support for scholarships, awards, research grants and more! https://sm.eatright.org/donateFoundation #eatrightPRO	1
599	Org6	Twitter	2021-01-28	In her President's Page article in the February Journal of the Academy of Nutrition and Dietetics, President Linda T. Farr, RDN, CSOWM, LD, FAND tells members how they can play an active role in advocacy efforts: https://sm.eatright.org/presidentspage #eatrightPRO @NutritiousTable	1
600	Org6	Twitter	2021-01-28	We're celebrating the important role of RDNs with this special #RDNday Contest! One #eatrightPRO member will be featured in Times Square, in Eat Right Weekly and affiliate newsletters, on the Academy website and social media. CityscapeSparklesStar-struck Enter by February 5: https://sm.eatright.org/RDNdaycontest	1
601	Org6	Twitter	2021-01-27	Are you an #RDN providing #breastfeeding and lactation support in an inpatient or outpatient setting? The Academy is collaborating with @UofNorthFlorida to recruit RDNs to help collect data for a study. Get involved: https://sm.eatright.org/BFregistry #eatrightPRO #rdchat #dietitian	1
602	Org6	Twitter	2021-01-27	The Academy of Nutrition and Dietetics honors outstanding food and nutrition practitioners and supporters of the nutrition and dietetics profession. TrophyClapping hands sign Learn more and submit nominations by March 1: https://sm.eatright.org/honoraward #eatrightPRO #nutrition #dietetics	1
603	Org6	Twitter	2021-01-27	Apply for the Gwendolyn Rossell Memorial Continuing Education Award by Feb. 1! This award is given to members of the @PHCNPG for short-term educational programs that enhance the contributions of public health #nutritionists to health care. More details: https://sm.eatright.org/recawards	1
604	Org6	Twitter	2021-01-27	retweet State affiliates are challenged to increase member participation in the Academy's National Election! Help our state take the lead while voicing your opinion for the future of our profession: https://sm.eatright.org/election2021 #eatrightPRO	1
605	Org6	Twitter	2021-01-27	retweet The Academy Foundation is the only charitable organization devoted exclusively to supporting #nutrition and #dietetics professionals, by empowering them to help consumers live healthier lifestyles! Support the Foundation: https://sm.eatright.org/donateFoundation #eatrightPRO	1
606	Org6	Twitter	2021-01-27	The Academy's Diversity and Inclusion Action Award provides $1,000 to an ACEND-accredited/approved #dietetics education program, affiliate, DPG, MIG or other recognized group for successful recruitment and retainment of diverse members. Apply by March 1:	1
607	Org6	Twitter	2021-01-27	We're less than two months away from celebrating #NationalNutritionMonth in March! Hugging facePartying faceConfetti ball The 2021 theme, "Personalize Your Plate," promotes creating nutritious meals to meet individuals’ cultural and personal food preferences. Learn more: https://sm.eatright.org/nnm2021pr #eatrightPRO	1
608	Org6	Twitter	2021-01-27	Now seeking applicants for the Academy's two-year #Diversity and Inclusion Leaders Program! Learn about this opportunity to receive mentorship, leadership training and networking, and be sure to apply by March 1: https://sm.eatright.org/divldrpgm #eatrightPRO #dietetics	1
609	Org6	Twitter	2021-01-26	Now's your chance to become an Academy media spokesperson and work with media outlets nationwide to share messaging about healthful eating and RDNs! Speaking head in silhouetteStudio microphoneTelevisionRadioPersonal computerMobile phoneNewspaper Learn more about this opportunity and apply by February 5: https://sm.eatright.org/spokesperson #eatrightPRO #dietetics #rdchat	1
610	Org6	Twitter	2021-01-26	During the #COVID19 pandemic, the Academy has gathered resources for food and nutrition practitioners to address preparedness, patient care and food safety and access. Use the Coronavirus Professional Resource Hub on #eatrightPRO: https://sm.eatright.org/COVID19hub #DDPG	1
611	Org6	Twitter	2021-01-26	Need CPEUs? Face with raised eyebrow New articles from the February issue of the Academy Journal are now available online: https://sm.eatright.org/jrnlCPE Open book To access CPE quizzes, visit https://sm.eatright.org/JANDquizzes or use the MyCDRGo app. #eatrightPRO #dietetics #nutrition #RDNCPE	1
612	Org6	Twitter	2021-01-26	The Gaynold Jensen Memorial Continuing Education Award is given to members of #Dietetics in #HealthCare Communities DPG for educational programs that enhance contributions of consultant #dietitians to health care. Apply for Foundation awards by Feb. 1: https://sm.eatright.org/recawards	1
613	Org6	Twitter	2021-01-26	retweet Are you conducting nutrition and dietetics research or in search of funding? Consider applying for an Academy Foundation research grant! Apply by February 1, 2021: https://sm.eatright.org/Foundationportal #eatrightPRO	1
614	Org6	Twitter	2021-01-26	#Medicare providers submitting claims for medical #nutrition therapy provided to patients with a diagnosis of CKD stage 3 may have recently received claim denials. Learn about this and other important practice management news in the December MNT Provider: https://sm.eatright.org/mntprovider	1
615	Org6	Twitter	2021-01-26	Candidate biographies are available for those on the Academy's 2021 national election ballot. Ballot box with ballot Get to know the candidates before voting takes place February 1 through 15: https://sm.eatright.org/electionbios #eatrightPRO #dietetics #leadership	1
616	Org6	Twitter	2021-01-25	Are you conducting nutrition and dietetics research or in search of funding? Consider applying for an Academy Foundation research grant! Apply by February 1, 2021: https://sm.eatright.org/Foundationportal #eatrightPRO	1
617	Org6	Twitter	2021-01-25	Don’t miss your chance to take part in the Academy National Election! You have until February 15 to cast your vote: https://sm.eatright.org/election2021 #eatrightPRO #dietetics	1
618	Org6	Twitter	2021-01-25	Be sure to follow the Academy's election campaigning rules, including not posting disparaging or negative comments against opposing candidates and not promoting individual candidates on Academy mailing lists or communication platforms. #eatrightPRO	1
619	Org6	Twitter	2021-01-25	The "Revolutionizing Sports Nutrition" 2021 @SCANdpg Virtual Symposium will inspire attendees to explore, challenge and discuss evidence-based #nutrition practice and policy. Learn more and register for the March 3-5 event: https://sm.eatright.org/SCANsymposium #eatrightPRO #sportsnutrition	1
620	Org6	Twitter	2021-01-25	Did you know there are Foundation award opportunities for nutrition practitioners, educators and students? Apply by February 1, 2021: https://sm.eatright.org/Foundationportal #eatrightPRO #dietetics	1
621	Org6	Twitter	2021-01-25	Apply by Feb. 1 for the @FCPDPG Communications & Educational Award, providing funding for culinary education enrichment and food educational presentations made by an #RDN or NDTR. Get more info on this and other Academy Foundation awards: https://sm.eatright.org/recawards #eatrightPRO	1
622	Org6	Twitter	2021-01-25	It's time for the #RDNday Contest! Star-struckRaising hands Enter by February 5 for a chance to be featured in New York's Times Square, plus in Eat Right Weekly and affiliate newsletters, and via the #eatrightPRO website and social media pages: https://sm.eatright.org/RDNdaycontest #NationalNutritionMonth	1
623	Org6	Twitter	2021-01-25	Voting in the Academy's 2021 election is approaching! Have you reviewed the slate of candidates? Be sure you're an informed voter come February 1: https://sm.eatright.org/election Ballot box with ballotBallot box with check #eatrightPRO #dietetics	1
624	Org6	Twitter	2021-01-23	This comprehensive resource offers the latest expert guidance for RDNs, physicians and other allied #health professionals who work with patients who have #thyroid disease: https://sm.eatright.org/NutrMgmtThyroidprint #eatrightPRO #ThyroidAwarenessMonth	1
625	Org6	Twitter	2021-01-23	The EAC recently published this article in the Academy Journal on enteral protein intake on growth and health outcomes in very-low-birthweight preterm infants: https://sm.eatright.org/enteralproteinpreterm #eatrightPRO #nutrition #dietetics #pediatrics	1
626	Org6	Twitter	2021-01-23	Use the Academy's quarterly social media toolkits to share #nutrition messaging and important deadlines with your followers online! Each PDF includes celebratory dates, key initiatives, timely topics and sample social media posts: https://sm.eatright.org/SMtoolkits #eatrightPRO	1
627	Org6	Twitter	2021-01-22	Today @POTUS Joe Biden signed an executive order that will help put healthy food on the table for many Americans impacted by #COVID19. The Academy applauds these efforts to swiftly address the disruption to food access caused by the pandemic. Learn more:	1
628	Org6	Twitter	2021-01-22	The @DiabetesDPG Virtual Symposium, Empowering Leaders in #Diabetes #Nutrition, is a chance to learn and earn up to 8 CPEUs. Check out the agenda, sessions and speakers for more details! Register at the early bird rate through January 28th: https://sm.eatright.org/DDPG2021symposium #eatrightPRO	1
629	Org6	Twitter	2021-01-22	Available through the Academy Foundation, the First International Nutritionist/Dietitian (FIND) Fellowship for Study in the USA is given to assist foreign nationals who are pursuing postgrad work in the U.S. Learn more and apply by Feb. 1: https://sm.eatright.org/recawards #eatrightPRO	1
630	Org6	Twitter	2021-01-22	The Academy's @SCANdpg is hosting its virtual symposium, "Revolutionizing Sports Nutrition," on March 3-5, 2021! Personal computer Learn about speakers, sessions, CPE and more, plus register online at the early bird rate through Feb. 17: https://sm.eatright.org/SCANsymposium #eatrightPRO #sportsnutrition	1
631	Org6	Twitter	2021-01-22	The Academy's media spokesperson program helps increase the public's knowledge of food and nutrition while establishing the registered #dietitian nutritionist as the best source for nutrition information! Learn more and apply by Feb. 5: https://sm.eatright.org/spokesperson #eatrightPRO	1
632	Org6	Twitter	2021-01-22	retweet During the #COVID19 pandemic, the Academy has gathered resources for food and nutrition practitioners to address preparedness, patient care and food safety and access. Use the Coronavirus Professional Resource Hub on #eatrightPRO:	1
633	Org6	Twitter	2021-01-22	#eatrightPRO is offering a $1,000 Diversity and Inclusion Action Award to recognize the accomplishments of an ACEND-accredited educational program, affiliate, DPG or MIG in successfully recruiting and retaining underrepresented individuals. Learn more:	1
634	Org6	Twitter	2021-01-22	Do you have an idea for a webinar that would benefit dietetics and nutrition professionals? Submit a proposal to the Call for Webinars! Happy person raising one hand #eatrightPRO is seeking proposals on beginner, intermediate, and advanced-level topics:	1
635	Org6	Twitter	2021-01-21	Want to help impact the future of the nutrition and #dietetics profession? Participate in the Academy’s 2021 National Election! Learn more and cast your vote: https://sm.eatright.org/election2021 #eatrightPRO	1
636	Org6	Twitter	2021-01-21	Before voting in the Academy's National Election (which is open February 1-15), get to know the candidates by reading their bios: https://sm.eatright.org/electionbios #eatrightPRO #RDN #Rdchat	1
637	Org6	Twitter	2021-01-21	Our social media toolkit makes it easy to share information on ways to stay safe during the COVID-19 pandemic and support health with good nutrition. Face with medical mask Access the kit here: https://sm.eatright.org/COVIDsocialkit #eatrightPRO #COVID19 #pandemic #nutrition #dietetics	1
638	Org6	Twitter	2021-01-21	Grow in your profession with the help of a mentor. Give back to your profession by becoming a mentor. Seedling The #eatrightPRO Mentor Match program matches you with a mentor or mentee who best fits your areas of interest, communication style, and availability:	1
639	Org6	Twitter	2021-01-21	retweet Check out the latest press release from the @eatrightPRO to learn more about the Academy's feedback regarding the 2020-2025 Dietary Guidelines for Americans. http://bit.ly/3o3SGT0 #OAND #eatrightPRO #eatrightohio	1
640	Org6	Twitter	2021-01-21	retweet Are you conducting nutrition and dietetics research or in search of funding? Consider applying for an Academy Foundation research grant! Apply by February 1, 2021 https://ed.gr/c3iay #eatrightPRO	1
641	Org6	Twitter	2021-01-21	The E. Neige Todhunter Memorial Doctoral Award is a $5,000 continuing education award given to master prepared dietetics educators and practitioners to pursue doctoral studies. Learn more and apply: https://sm.eatright.org/schlrshps #eatrightPRO #RDN #nutrition #dietetics	1
642	Org6	Twitter	2021-01-21	As the COVID-19 public health emergency continues, the Academy’s Telehealth Quick Guide for RDNs has been updated. Read the latest edition for clarification around coverage for telephone and online assessment and much more: https://sm.eatright.org/COVIDtelehealthguide #eatrightPRO #telehealth #RDN	1
643	Org6	Twitter	2021-01-20	Don't miss the Diabetes DPG's first ever virtual symposium! The symposium, which will take place Feb 19 - 21, is an opportunity to refresh and grow your knowledge in the area of #diabetes. Learn more about the sessions and register: https://sm.eatright.org/DDPG2021symposium #eatrightPRO #DDPG	1
644	Org6	Twitter	2021-01-20	The EAL-KDOQI 2020 guideline is available in ready-to-use slide decks. Slides include guideline recommendations, implementation considerations and examples. Developed by the National #Kidney Foundation and #eatrightPRO member volunteers. Learn more: https://sm.eatright.org/CKDguidelineresource	1
645	Org6	Twitter	2021-01-20	Applications for the #eatrightPRO Diversity and Inclusion Leaders Program are due by March 1. The two-year opportunity is intended to support members from underrepresented groups within the nutrition and dietetics profession. Learn more:	1
646	Org6	Twitter	2021-01-20	range of #eatrightPRO books and resources, including reference books, textbooks, pocket guides, client education materials and consumer books, is available for purchase on eatrightSTORE. Raising hands Members receive a 20-30 percent on most publications: https://sm.eatright.org/eatrightSTORE	1
647	Org6	Twitter	2021-01-20	As we continue navigating the COVID-19 pandemic, #eatrightPRO is steadily gathering resources for practitioners to address preparedness, patient care, food safety and access and more. View the resources, submit a question to the Q&A and view webinars:	1
648	Org6	Twitter	2021-01-20	retweet Going back to school can be expensive. Did you know there are Foundation award and grant opportunities for nutrition practitioners, educators, and students? Apply by February 1st: http://ow.ly/96Y850DbrEv #eatrightPRO #dietetics #awards	1
649	Org6	Twitter	2021-01-20	#RDNs and #NDTRs interested in obtaining leadership training should consider applying to the CDR Leadership Award Continuing Education Award. Up to four awards of up to $5,000 will be given. Applications are due by Feb. 1: https://sm.eatright.org/schlrshps #eatrightPRO	1
650	Org6	Twitter	2021-01-20	The Abridged Nutrition Care Process Terminology (NCPT) Reference Manual features a collection of NCP terminology and practice tools including NCP snapshots, the #nutrition assessment matrix and the nutrition diagnosis matrix. Check it out: https://sm.eatright.org/abridgedNCPT #eatrightPRO	1
651	Org6	Twitter	2021-01-19	January 28 is the deadline to apply for the Academy Foundation's Prioritizing Diversity and Inclusion in Nutrition and #Dietetics: Overcoming Obstacles to #RDN Recruitment, Education and Advancement Fellowship! Get more info and apply: https://sm.eatright.org/prioritizingdiversityfellow	1
652	Org6	Twitter	2021-01-19	Commends Evidence-Based 2020-2025 #DietaryGuidelines for Americans, Notes Opportunities for Future Updates https://bit.ly/3qEAIZ9 #RDchat #USDA	1
653	Org6	Twitter	2021-01-19	Apply by February 1 for the CDR Grassroots Marketing Award through the Academy Foundation! This fund provides #RDNs or #NDTRs funds to promote CDR credentials at the local level to prospective employers or third-party-payers. More details: https://sm.eatright.org/recawards #eatrightPRO	1
654	Org6	Twitter	2021-01-19	If you're an RDN, NDTR or student member who would like to volunteer for an Academy committee during the 2021-22 program year and beyond, please complete this survey by Thursday, January 21: https://sm.eatright.org/opptosrvsurvey #eatrightPRO #dietetics #rdchat	1
655	Org6	Twitter	2021-01-19	We're recruiting #RDNs to help collect data for a study looking at the documentation of #breastfeeding and lactation support provided to infants and the individuals providing them human milk. Learn more about how to get involved: https://sm.eatright.org/BFregistry #eatrightPRO #dietitians	1
656	Org6	Twitter	2021-01-19	retweet During the #COVID19 pandemic, the Academy has gathered resources for food and nutrition practitioners to address preparedness, patient care and food safety and access. Use the Coronavirus Professional Resource Hub on #eatrightPRO:	1
657	Org6	Twitter	2021-01-19	Do you know who is running in the upcoming Academy National Election? Thinking face View the slate of candidates and read their bios before voting starts on February 1: https://sm.eatright.org/electionbios	1
658	Org6	Twitter	2021-01-19	Recordings from #FNCE 2020 are now available on eatrightSTORE and the topics are seemingly endless! If you're still stuck inside, you may want to use this time to get some #RDNCPE. Raising hands View the sessions: https://sm.eatright.org/FNCESessionsStore	1
659	Org6	Twitter	2021-01-19	The Commission on Dietetic Registration Faculty Fellowship Award is a continuing education award of up to $10,000 for individuals with doctoral degrees seeking to become RDNs. Learn more and apply:	1
660	Org6	Twitter	2021-01-18	Since 1981, nutrition professionals have trusted one diet manual for access to the most reliable information: the Nutrition Care Manual®, from the Academy of Nutrition and Dietetics. Hugging face Learn more about the NCM by watching this short video: https://sm.eatright.org/NCMVideo #eatrightPRO	1
661	Org6	Twitter	2021-01-18	Learn what's in store for RDNs who are Medicare providers in 2021 and download a new toolkit that will drive referrals from primary care providers. Access the information in the December MNT Provider: https://sm.eatright.org/mntprovider #eatrightPRO #RDN #RD	1
662	Org6	Twitter	2021-01-18	Campaigning for 2021 @eatrightPRO ballot can begin TODAY, January 18th, with voting from February 1-15, 2021. NOW is the time to learn about the candidates and their backgrounds at https://eatrightpro.org/leadership/nominations-and-elections/national-election	1
663	Org6	Twitter	2021-01-18	The Academy's National Campaign Rules have been revised for the 2021 election. Watch this webinar to learn more details and to get clarification of the rules: https://sm.eatright.org/campaignruleswebinar Ballot box with ballot #eatrightPRO #RDN #NDTR #RDchat	1
664	Org6	Twitter	2021-01-16	The Academy is poised to work with the Biden-Harris administration on the “American Rescue Plan,” which would fund vaccinations and #healthcare, provide direct relief to those disproportionately impacted by #COVID19 and support struggling communities.	1
665	Org6	Twitter	2021-01-16	Can you believe the 2021 Academy election voting period begins in just over two weeks?! CalendarHourglass with flowing sand Mark your calendar for February 1-15. If you haven't checked out the slate of candidates and their bios, now is the time: https://sm.eatright.org/electionbios #eatrightPRO #dietetics	1
666	Org6	Twitter	2021-01-15	The Academy commends @USDA and @HHSGov for developing the 2020-2025 #DietaryGuidelines for Americans. Read the latest announcement to learn about the Academy's role throughout the DGAs’ development process: https://sm.eatright.org/20202025DGAsPR #eatrightPRO #rdchat	1
667	Org6	Twitter	2021-01-15	Gearing up to take the registration exam for registered #dietitian nutritionists? eatrightPREP for the #RDN Exam can help strengthen your exam readiness! Personal computer Click the "Try it out" button to access a free eatrightPREP RDN Demo Course: https://sm.eatright.org/eatrightPREPdemo #futureRDN #rd2be	1
668	Org6	Twitter	2021-01-15	Julie O’Sullivan Maillet Research Grant supports #research demonstrating the value of #dietetics professionals on the #health of the public or the evolving role of dietetics pros in the profession. Learn about this and other grants, and apply by Feb. 1: https://sm.eatright.org/grants	1
669	Org6	Twitter	2021-01-15	Today, January 15th, is the last day to submit an intent to nominate for the Academy's 2021 national honors and awards! Calendar Learn about all the honors and awards, and submit complete nominations by March 1: https://sm.eatright.org/honoraward #eatrightPRO #rdchat #dietetics #dietitians	1
670	Org6	Twitter	2021-01-15	Voting in the Academy's National Election takes place February 1-15. If you're interested to know who's running, you can view the slate of candidates and read their bios: https://sm.eatright.org/electionbios #eatrightPRO #RDN #NDTR #Rdchat	1
671	Org6	Twitter	2021-01-15	Visit the #eatrightPRO COVID-19 Professional Resource Hub to get free access to the Nutrition Care Manual's 2020 Critical Illness Section and much more: https://sm.eatright.org/COVID-19Info #covid19 #pandemic #nutrition #RDN #NDTR	1
672	Org6	Twitter	2021-01-15	Nominations for the Academy’s National Honors and Awards are due March 1st! Nominate a colleague who has advanced the nutrition and dietetics profession, exhibited leadership in the field and shown devotion to serving others: https://sm.eatright.org/2021honorsawards #eatrightPRO	1
673	Org6	Twitter	2021-01-14	After thoughtful consideration and with the primary need to ensure the health and welfare of attendees, the #eatrightPRO Board of Directors has determined #FNCE 2021 will be a virtual event on October 16-19. Learn more about the upcoming conference: https://sm.eatright.org/FNCE21announcement	1
674	Org6	Twitter	2021-01-14	The Jean Hankin Nutritional Epidemiology Research Grant is given to provide financial support to a doctoral student working on a dissertation in the area of nutritional epidemiology. If this is you, learn the eligibility criteria and consider applying:	1
675	Org6	Twitter	2021-01-14	Join me in urging Congress to support diversity in dietetics education #eatrightPRO	1
676	Org6	Twitter	2021-01-14	Did you know the Academy's National Campaign Rules have been revised for the 2021 election? Thinking face If you missed the webinar that provided the details and clarification of the rules, you can watch it now: https://sm.eatright.org/campaignruleswebinar #eatrightPRO #RDN #NDTR #RDchat	1
677	Org6	Twitter	2021-01-14	The Academy's Diversity and Inclusion Leaders Program is a two-year opportunity intended to support members from underrepresented groups within the nutrition and dietetics profession. Learn more about the program components and apply by March 1:	1
678	Org6	Twitter	2021-01-14	The Breastmilk Ecology: Genesis of Infant Nutrition (BEGIN) is @NIH 's virtual meeting series on the ecology of human milk and implications for mom and infant. Register now for the first meeting: https://cvent.me/aQZwgP. View past meetings:	1
679	Org6	Twitter	2021-01-14	The Academy Foundation is seeking an #RDN member for the “Prioritizing #Diversity and Inclusion in Nutrition and #Dietetics: Overcoming Obstacles to RDN Recruitment, Education and Advancement” Fellowship. Get more information and apply by January 28! https://sm.eatright.org/prioritizingdiversityfellow	1
680	Org6	Twitter	2021-01-13	The Academy's media spokesperson program includes training, assistance in coordinating interviews with top media outlets across the country and much more! See how YOU could help spread healthful eating messaging with the nation: https://sm.eatright.org/spokesperson *Applications due Feb. 5	1
681	Org6	Twitter	2021-01-13	The Academy's distance learning CPE offerings allow you to learn at your own pace and convenience. Cultivate skills and knowledge through live and recorded webinars, online certificate of training programs and #FNCE On-Demand: https://sm.eatright.org/distancelearning #eatrightPRO #dietetics	1
682	Org6	Twitter	2021-01-13	The $15,000 Colgate Palmolive Fellowship in #Nutrition, Oral Health/Dental Education is given to support #research in nutrition and oral health or #dental education. View eligibility requirements for this and other Foundation grants, and apply by Feb. 1: https://sm.eatright.org/grants	1
683	Org6	Twitter	2021-01-13	The Academy publishes quarterly interactive toolkits full of celebratory dates, key initiatives, timely topics for blog posts and media interviews, and sample social media posts! Check them out: https://sm.eatright.org/SMtoolkits #eatrightPRO #nutrition #dietetics	1
684	Org6	Twitter	2021-01-12	retweet New manuscript from the Academy compiling research on nutrition assessment and interventions for the prevention and treatment of malnutrition amongst older adults living in long term care and the community https://bit.ly/39xc2uq #EatRightPro #Malnutrition	1
685	Org6	Twitter	2021-01-12	Join me in urging Congress to support diversity in dietetics education #eatrightPRO	1
686	Org6	Twitter	2021-01-12	retweet The Academy Foundation is the only charitable organization devoted exclusively to supporting #nutrition and #dietetics professionals, by empowering them to help consumers live healthier lifestyles! Support the Foundation: https://sm.eatright.org/donateFoundation #eatrightPRO	1
687	Org6	Twitter	2021-01-12	retweet Did you know there are Foundation award opportunities for nutrition practitioners, educators and students? Apply by February 1, 2021: https://ed.gr/c3ia0 #eatrightPRO #dietetics	1
688	Org6	Twitter	2021-01-12	A new Academy Journal Editor’s Podcast features Editor-in-Chief Linda Snetselaar, PhD, RDN, LD, FAND, and Edward Frongillo, PhD, professor and director of Global Health Initiatives with @UofSC , discussing #foodinsecurity in children in the U.S.: https://sm.eatright.org/JRNeditorpodcast	1
689	Org6	Twitter	2021-01-12	Proposals for the Ann A. Hertzler Memorial Research Grant should address research pertaining to #breastfeeding and infant feeding practices to align with the inclusion of infants and toddlers under 2 in the 2020-2025 #DietaryGuidelines. Apply by Feb. 1: https://sm.eatright.org/grants	1
690	Org6	Twitter	2021-01-12	Part of the Academy's Nutrition Care Manual, the Sports Nutrition Care Manual provides trends in athletic performance and #nutrition, while preparing you for the Board Certified Specialist in #SportsNutrition exam. Learn more about this online platform!	1
691	Org6	Twitter	2021-01-12	We'd love to have you volunteer for an Academy committee during the 2021-22 program year and beyond! If you're interested, you can learn more about volunteer opportunities and complete this survey by Thursday, January 21: https://sm.eatright.org/opptosrvsurvey #eatrightPRO #dietetics #rdchat	1
692	Org6	Twitter	2021-01-12	Voting in the Academy's 2021 national election starts in less than one month! Ballot box with ballot Get to know the candidates on the ballot: https://sm.eatright.org/electionbios #eatrightPRO #dietetics #rdchat	1
693	Org6	Twitter	2021-01-12	Are you conducting nutrition and dietetics research or in search of funding? Consider applying for an Academy Foundation research grant! Apply by February 1, 2021: https://sm.eatright.org/Foundationportal #eatrightPRO	1
694	Org6	Twitter	2021-01-12	Empowering Leaders in #Diabetes Nutrition," a virtual symposium on Feb. 19-21 and hosted by @DiabetesDPG , will feature sessions developed by experts in the field who represent various practice areas. Register by Jan. 28 for the best rates: https://sm.eatright.org/DDPG2021symposium #eatrightPRO	1
695	Org6	Twitter	2021-01-11	What does the new year have in store for #RDNs who are #Medicare providers? Get the latest information on this, plus download a new toolkit to drive RDN referrals from primary care providers and more. Log in to access the December MNT Provider newsletter: https://sm.eatright.org/mntprovider	1
696	Org6	Twitter	2021-01-11	The Journal of the Academy of #Nutrition and #Dietetics has published a special supplement, supported by the @USDANutrition , providing new research and commentary on food insecurity in the United States. View the supplement: https://sm.eatright.org/JANDfoodinsecuritysupp #eatrightPRO #foodinsecurity	1
697	Org6	Twitter	2021-01-11	Are you a registered #dietitian nutritionist providing #breastfeeding and #lactation support in an inpatient or outpatient setting, such as a hospital, outpatient clinic, private practice or community program? Join this important study: https://sm.eatright.org/BFregistry #eatrightPRO	1
698	Org6	Twitter	2021-01-11	During the #COVID19 pandemic, the Academy has gathered resources for food and nutrition practitioners to address preparedness, patient care and food safety and access. Use the Coronavirus Professional Resource Hub on #eatrightPRO:	1
699	Org6	Twitter	2021-01-11	The Amy Joye Memorial Research Award grants $5,000 to an eligible applicant. Learn more about this and other available Academy Foundation #research grants: https://sm.eatright.org/grants #eatrightPRO #nutrition #dietetics	1
700	Org6	Twitter	2021-01-09	Are you working to address food security during the COVID-19 #pandemic? #eatrightPRO is conducting a study that will help inform policy and practice efforts related to the pandemic. Read more about participating in the survey: https://redcap.link/RDNCOVID19_FS2 #RDchat #RDN #nutrition	1
701	Org6	Twitter	2021-01-09	The #eatrightPRO Diversity and Inclusion Action Award provides $1,000 to an ACEND-accredited/approved dietetics education program, affiliate, DPG, MIG or other group for accomplishments to successfully recruit and retain diverse individuals. Learn more:	1
702	Org6	Twitter	2021-01-08	If you're looking for creative ways to share #eatrightPRO key messages, use our social media toolkits! Each quarter, the Academy publishes an interactive PDF full of celebratory dates, key initiatives, sample posts and more. Access the toolkit:	1
703	Org6	Twitter	2021-01-08	The #Pediatric Nutrition Care Manual provides age-specific recommendations for infants, children and teens. The manual includes pediatric calculators, client handouts and more. Learn more by watching this short video: https://sm.eatright.org/PNCMvideo #eatrightPRO #RDN	1
704	Org6	Twitter	2021-01-08	How has the COVID-19 pandemic impacted the way you provide dietetics education? #eatrightPRO is conducting a study to help inform policy and practice efforts related to the pandemic. If interested, please read more about participating in the survey: https://redcap.link/RDNCOVID19_Ed	1
705	Org6	Twitter	2021-01-08	The CDR Advanced Practice Residency Awards provide support for establishing advanced practice programs and for individuals in an advanced practice program. Learn more about eligibility requirements and how to apply: https://sm.eatright.org/schlrshps #eatrightPRO #RDN	1
706	Org6	Twitter	2021-01-08	Are you interested in presenting an abstract at #FNCE 2021? The Call for Abstracts is now open through February 18! Raising hands Learn all about the abstract categories, get tips from experts and more: https://sm.eatright.org/fnceabstract #eatrightPRO #nutrition #dietetics #RDchat #RDN	1
707	Org6	Twitter	2021-01-08	The Barbara Ann F. Hughes Nutrition Policy, Advocacy and Education Award was established to provide educational stipends for #nutrition professionals on the subjects of #policy initiatives and #advocacy. See eligibility criteria and apply by Feb. 1:	1
708	Org6	Twitter	2021-01-07	Are you interested in spreading the message of health and nutrition? Speaking head in silhouette If so, consider applying to the Academy’s media Spokesperson Program. Openings are available in many locations and specialty areas. Application deadline is February 5: https://sm.eatright.org/spokesperson #eatrightPRO	1
709	Org6	Twitter	2021-01-07	The #eatrightPRO Foundation is supporting a new opportunity for a Fellow to lead a two-year project titled “Prioritizing Diversity and Inclusion in Nutrition and Dietetics: Overcoming Obstacles to RDN Recruitment, Education and Advancement.” Learn more: https://sm.eatright.org/prioritizingdiversityfellow	1
710	Org6	Twitter	2021-01-07	Get ready to celebrate National Nutrition Month with us in March! Partying face We've got all the goodies you need to help spread the excitement! Browse the 2021 catalog: http://sm.eatright.org/NNMcatalog #eatrightPRO #NationalNutritionMonth #RDN #NDTR #futureRDN #RD2be	1
711	Org6	Twitter	2021-01-07	#eatrightPRO is conducting a study that will help inform policy and practice efforts related to the COVID-19 pandemic. If you're providing #nutrition care to patients via #telehealth during the pandemic, please consider participating in the survey: https://redcap.link/RDNCOVID19_TH2 #RDN	1
712	Org6	Twitter	2021-01-07	How has the #COVID19 pandemic impacted the way you deliver #nutrition care in the hospital? Consider telling Academy researchers about your experience via this survey (HRRC# 20-187): https://redcap.link/RDNCOVID19_ICU2 #coronavirus #eatrightPRO #RDN	1
713	Org6	Twitter	2021-01-07	A big MQii milestone was accomplished at the end of December 2020 when @CMSGov published the final 2020 Measures Under Consideration List with the inclusion of the MUC20-0032 Global Malnutrition Composite Score. Learn more: https://sm.eatright.org/MQiimilestone #eatrightPRO #malnutrition	1
714	Org6	Twitter	2021-01-06	Do you want to nominate someone for an Academy national honor or award? Trophy Let us know by January 15, which is the deadline to submit an intent to nominate. Full nominations are due by March 1. Learn about the honors and awards: https://sm.eatright.org/honoraward #eatrightPRO #dietetics	1
715	Org6	Twitter	2021-01-06	The Abbott Nutrition Malnutrition Award ($1,400) recognizes up to four #eatrightPRO members working in a hospital setting who have made a significant contribution to improve awareness of #malnutrition. Apply for this and other Foundation awards by Feb. 1.	1
716	Org6	Twitter	2021-01-06	The Academy's Nutrition Care Manual suite of products consists of three manuals focusing on adult, pediatric and sports nutrition care. Learn about the easy-to-use online platform filled with reliable information: https://sm.eatright.org/NCMsuite Personal computer #eatrightPRO #nutrition #dietetics	1
717	Org6	Twitter	2021-01-06	Join @DiabetesDPG on Feb. 19-20 for the virtual symposium, "Empowering Leaders in Diabetes #Nutrition." The event will feature expert speakers discussing the most relevant topics in #diabetes care today! Register at early bird rates by January 28: https://sm.eatright.org/DDPG2021symposium	1
718	Org6	Twitter	2021-01-06	We're recruiting #RDNs who provide #breastfeeding and #lactation support in inpatient or outpatient settings for a study on the documentation of breastfeeding/lactation support provided to infants and the individuals providing them human milk. Learn more: https://sm.eatright.org/BFregistry	1
719	Org6	Twitter	2021-01-05	How has the #COVID19 pandemic impacted the way you deliver #nutrition care? Consider telling Academy researchers about your experience via this survey (HRRC# 20-187): https://redcap.link/RDNCOVID19_Branch #coronavirus #eatrightPRO #RDN	1
720	Org6	Twitter	2021-01-05	Have you taken time to review the slate of candidates on the Academy's 2021 national election ballot? https://sm.eatright.org/election Remember, voting begins February 1 and ends February 15! Ballot box with ballot #eatrightPRO #dietetics #rdchat	1
721	Org6	Twitter	2021-01-05	Learn about the Anita Owen Award of Recognition for Innovative Nutrition Education Programs for the Public ($1,000) and apply by February 1! Plus, check out other available Foundation awards. #eatrightPRO #nutrition #dietetics	1
722	Org6	Twitter	2021-01-04	The slate of candidates for the Academy's 2021 national ballot, chosen from many excellent nominees, is available to review prior to voting from February 1 through February 15. Learn more about each candidate: https://sm.eatright.org/electionbios #eatrightPRO #dietetics	1
723	Org6	Twitter	2021-01-04	The Abbott Nutrition Award in Women’s Health ($1,000) recognizes #dietitians who make significant contributions to the importance of #nutrition in women’s #health. Learn more about this and other available Foundation awards, and apply by Feb. 1.	1
724	Org6	Twitter	2021-01-04	The Academy's Diversity and Inclusion Leaders Program supports members from underrepresented groups within the #nutrition and #dietetics profession by providing mentorship, leadership training and networking opportunities. Apply by March 1: https://sm.eatright.org/divldrpgm #eatrightPRO	1
725	Org6	Twitter	2021-01-04	There's still time to complete the Opportunities to Serve Survey to let us know you're interested in volunteering to serve on an Academy committee during the 2021-2022 program year and beyond! https://sm.eatright.org/opptosrvsurvey Deadline = January 21 Calendar #eatrightPRO #dietetics #dietitians	1
726	Org6	Twitter	2020-12-30	retweet The Academy offers many resources for nutrition and dietetics professionals to further their education from the comfort of home! Review this list of convenient options: https://sm.eatright.org/learningdistance #eatrightPRO #RDNCPE #DDPG	1
727	Org6	Twitter	2020-12-30	For my fellow members of @EatRightPro , consider participating in the Mentor Match program, as a mentor or mentee. As @NutritiousTable writes, “Mentoring is an essential step in the development of members, our profession’s diversity and inclusivity, and our organization’s future.”	1
728	Org6	Twitter	2020-12-30	The Academy supports the recommendations and “life stages” approach of the 2020-2025 #DietaryGuidelines for Americans. The Academy is conducting a thorough review of the #DGAs and continues to request increased funding for #nutrition & #dietetics research. https://sm.eatright.org/20202025DGAsreleased	1
729	Org6	Twitter	2020-12-28	Free and open to Academy members, the Mentor Match program connects you with a mentor or mentee who best fits your professional areas of interest, communication style and availability. Learn more about this resource: https://sm.eatright.org/mentormatch #eatrightPRO	1
730	Org6	Twitter	2020-12-28	retweet Free and open to Academy members, the Mentor Match program connects you with a mentor or mentee who best fits your professional areas of interest, communication style and availability. Learn more about this resource: https://sm.eatright.org/mentormatch #eatrightPRO #rd2b	1
731	Org6	Twitter	2020-12-24	There is limited research examining effective #nutrition therapy methods for nutrition pros working with #transgender individuals. More research is needed to inform evidence-based clinical practice guidelines. Learn more in this scoping review:	1
732	Org6	Twitter	2020-12-23	Are you registered to attend the 2021 @DiabetesDPG Virtual Symposium, Empowering Leaders in Diabetes Nutrition, on Feb. 19-20? This event will highlight trends, emerging #research and current topics in #diabetes management. Learn more: https://sm.eatright.org/DDPG2021symposium #eatrightPRO	1
733	Org6	Twitter	2020-12-23	There are lots of ways Academy members can get involved in grassroots advocacy efforts at the local level! Learn more: https://sm.eatright.org/localadvocacy #eatrightPRO #dietetics #rdchat	1
734	Org6	Twitter	2020-12-23	Are you interested in receiving media training and becoming a spokesperson for the Academy of #Nutrition and #Dietetics? There are several open geographical markets and areas of expertise. Log in to learn more and apply by February 5, 2021: https://sm.eatright.org/spokesperson #eatrightPRO	1
735	Org6	Twitter	2020-12-23	Free for Academy members, the Mentor Match program connects you with a mentor or mentee who best fits your professional areas of interest, communication style and availability. Learn more about this resource: https://ed.gr/czhzp #eatrightPRO	1
736	Org6	Twitter	2020-12-23	The Academy Foundation offers recognition awards, leadership recognition and education stipends to members and #dietetics student members! Learn about the awards that are currently open and apply by February 1 at 11:59 p.m. CT: https://sm.eatright.org/recawards #eatrightPRO #futureRDN	1
737	Org6	Twitter	2020-12-23	retweet Here’s how the newly passed #Coronavirus relief deal will help address #food #insecurity and health #disparities as it continues providing much needed support to millions of Americans: http://bit.ly/3auBi6T #OAND #stimulus #eatrightohio #eatrightpro	1
738	Org6	Twitter	2020-12-23	retweet Help Medicare beneficiaries get coverage on much needed treatment for chronic conditions by taking action and urging your member of Congress to support the #MNTAct, which would expand access to medical nutrition therapy: https://sm.eatright.org/actionalert #eatrightPRO	1
739	Org6	Twitter	2020-12-23	The Academy Foundation is currently accepting proposals for select grants with a deadline of February 1, 2021, at 11:59 pm CT. Learn more, including how to apply via the Foundation's online platform: https://sm.eatright.org/grants #nutrition #dietetics #research #eatrightPRO	1
740	Org6	Twitter	2020-12-22	We wish you a happy, healthy holiday season and new year! Watch a special holiday message from Academy President Linda T. Farr, RDN, CSOWM, LD, FAND: https://sm.eatright.org/2020holidaygreeting #eatrightPRO #nutrition #dietetics #dietitian #RDN #NDTR #futureRDN	1
741	Org6	Twitter	2020-12-22	Are you using the Academy's Nutrition Care Manual? Written by RDNs who specialize in clinical #nutrition, the NCM helps you consistently meet regulatory standards in any practice setting. Learn more, including how to access a free trial: https://sm.eatright.org/NCMshort #eatrightPRO	1
742	Org6	Twitter	2020-12-22	We're seeking #eatrightPRO members who are interested in volunteering to serve on an Academy committee during the 2021-22 program year and beyond! To express interest, please complete this survey by Thursday, January 21: https://sm.eatright.org/opptosrvsurvey #rdchat #dietetics #dietitians	1
743	Org6	Twitter	2020-12-22	Learn more about the Academy's two-year Diversity and Inclusion Leaders Program and apply by March 1: https://sm.eatright.org/divldrpgm #eatrightPRO #dietetics #dietitians #rdchat	1
744	Org6	Twitter	2020-12-22	Academy Journal articles from the January issue that offer CPE are now available: https://sm.eatright.org/jrnlCPE Open book To access quizzes, use the MyCDRGo app or visit https://sm.eatright.org/JANDquizzes. #eatrightPRO #rdchat #dietetics	1
745	Org6	Twitter	2020-12-21	Since 1979, specific Academy Foundation awards and scholarships have been made available for diverse individuals within the field of #dietetics. From 2017-2019, the Foundation awarded more than $535,000 to 211 diverse recipients. Learn more: https://sm.eatright.org/foundationdiversityscholarshipsawards #eatrightPRO	1
746	Org6	Twitter	2020-12-21	The Mentor Match program is free to members and connects you with a mentor or mentee who best fits your professional areas of interest, communication style and availability. Learn more about this resource: https://ed.gr/czhzd #eatrightPRO	1
747	Org6	Twitter	2020-12-21	How has the #COVID19 pandemic impacted the way you provide #dietetics education? Consider telling Academy researchers about your experience via this survey (HRRC# 20-187): https://redcap.link/RDNCOVID19_Ed #coronavirus #eatrightPRO #nutrition #RDN	1
748	Org6	Twitter	2020-12-21	The November MNT Provider newsletter includes information about National #Diabetes Month, how your Reimbursement Representatives can help with coverage and payment questions, diabetes self-management training services furnished via #telehealth and more: https://sm.eatright.org/mntprovider	1
749	Org6	Twitter	2020-12-21	Submit your nominations for Academy national honors and awards! Trophy Intent to nominate due January 15; all nominations due March 1. Learn about the awards in areas including media, excellence in practice, social media and more: https://sm.eatright.org/honoraward #eatrightPRO #dietetics	1
750	Org6	Twitter	2020-12-20	retweet Check out the #Diversity and #Inclusion Mini-Grants sponsored by @eatrightPRO which support Academy affiliate, DPG and MIG outreach to students and professionals from underrepresented groups within the field of #nutrition and #dietetics. Downwards arrow	1
751	Org6	Twitter	2020-12-20	Are you working to address food security during the #COVID19 pandemic? Consider telling Academy researchers about your experience via this survey (HRRC# 20-187): https://redcap.link/RDNCOVID19_FS2 #coronavirus #eatrightPRO #nutrition #RDN #foodsecurity	1
752	Org6	Twitter	2020-12-20	Are you providing #nutrition care to patients via #telehealth during the #COVID19 pandemic? Consider telling Academy researchers about your experience via this survey (HRRC# 20-187): https://redcap.link/RDNCOVID19_TH2 #coronavirus #eatrightPRO #RDN	1
753	Org6	Twitter	2020-12-20	retweet Free and open to Academy members, the Mentor Match program connects you with a mentor or mentee who best fits your professional areas of interest, communication style and availability. Learn more about this resource: https://sm.eatright.org/mentormatch #eatrightPRO #DDPG	1
754	Org6	Twitter	2020-12-20	How has the #COVID19 pandemic impacted the way you deliver nutrition care in the hospital? Consider telling Academy researchers about your experience via this survey (HRRC# 20-187): https://redcap.link/RDNCOVID19_ICU2 #coronavirus #eatrightPRO #nutrition #RDN	1
755	Org6	Twitter	2020-12-19	How has the #COVID19 pandemic impacted the way you deliver nutrition care? Consider telling Academy researchers about your experience via this survey (HRRC# 20-187): https://redcap.link/RDNCOVID19_Branch #coronavirus #eatrightPRO #nutrition #RDN	1
756	Org6	Twitter	2020-12-18	The Foundation is the only charitable organization devoted exclusively to supporting nutrition and dietetics professionals. Please consider making a holiday gift to support the Foundation’s Annual Fund. Learn more: https://sm.eatright.org/donate #eatrightPRO #RDN #NDTR	1
757	Org6	Twitter	2020-12-18	Tell Congress: the time is now for COVID-19 relief. Take action today and add your support to help ensure nutrition security: https://eatrightpro.org/action-center #eatrightPRO	1
758	Org6	Twitter	2020-12-18	The Academy's and the CDR's Nominating Committees are pleased to announce the slate of candidates for the 2021 national ballot, chosen from many excellent nominees. View the slate of candidates: https://sm.eatright.org/election #eatrightPRO #RDN #NDTR	1
759	Org6	Twitter	2020-12-18	Tell Congress to pass Coronavirus relief before recess. #boostSNAPnow #eatrightpro http://votervoice.net/Shares/B9ZdmAI6ACpPTAMMsbX7EAA	1
760	Org6	Twitter	2020-12-18	Free and open to all members, the Academy's online Mentor Match program will match you with a #mentor or #mentee who best fits your professional areas of interest, communication style and availability. Sign up today: https://sm.eatright.org/mentor #eatrightPRO	1
761	Org6	Twitter	2020-12-18	retweet Free and open to Academy members, the Mentor Match program connects you with a mentor or mentee who best fits your professional areas of interest, communication style and availability. Learn more about this resource: https://sm.eatright.org/mentormatch #eatrightPRO	1
762	Org6	Twitter	2020-12-18	retweet Due to COVID, one of the nation's most urgent problems has only grown worse: hunger and food insecurity. Tell Congress to pass Coronavirus relief before recess. #boostSNAPnow #eatrightpro http://votervoice.net/Shares/BWVdPAI6ACpPTA9PebX7EAA	1
763	Org6	Twitter	2020-12-18	retweet I took 2 minutes to make a difference, will you? Tell Congress to pass Coronavirus relief before recess. #boostSNAPnow #eatrightpro http://votervoice.net/Shares/BAAAAAI6ACpPTA6LebX7EAA	1
764	Org6	Twitter	2020-12-18	Apply for the #eatrightPRO Diversity and Inclusion Action Award, which awards an ACEND-accredited/approved education program, affiliate, DPG, MIG or other group for accomplishments to successfully recruit and retain diverse individuals. Learn more:	1
765	Org6	Twitter	2020-12-18	In the ACEND library you can access educational materials, such as webinars and articles, aimed to assist #nutrition and #dietetics faculty and preceptors on the topic of Diversity, Equity and Inclusion. Learn more: https://sm.eatright.org/ACENDDiversityInclusion #eatrightPRO	1
766	Org6	Twitter	2020-12-18	The Academy's Foundation is accepting applications for select research grants and recognition, continuing education, program development and international awards. Apply by February 1, 2021: https://sm.eatright.org/FoundationAppPortal #eatrightPRO #RDN #NDTR #RD2be #futureRDN	1
767	Org6	Twitter	2020-12-18	retweet Join me in telling Congress to pass Coronavirus relief before recess. #boostSNAPnow #eatrightpro http://votervoice.net/Shares/BAAAAAI6ACpPTA7fdbX7EAA	1
768	Org6	Twitter	2020-12-17	retweet Tell Congress to pass Coronavirus relief before recess that includes strong measures for SNAP, WIC, school meals, senior meals & more! Thank you to @eatrightPRO #boostSNAPnow #eatrightpro http://votervoice.net/Shares/BwN2gAI6ACtPTADIcbX7EAA	1
769	Org6	Twitter	2020-12-17	retweet Tell Congress to pass Coronavirus relief before recess. #boostSNAPnow #eatrightpro http://votervoice.net/Shares/BAAAAAI6ACpPTA_SabX7EAA	1
770	Org6	Twitter	2020-12-17	Do your part! Tell Congress to pass Coronavirus relief before recess. #boostSNAPnow #eatrightpro http://votervoice.net/Shares/BG5hgAI6ACpPTAlQabX7EAA	1
771	Org6	Twitter	2020-12-17	We need to keep nutrition in! Tell Congress to pass Coronavirus relief before recess. #boostSNAPnow #eatrightpro http://votervoice.net/Shares/BiSSMAI6ACpPTANmYbX7EAA	1
772	Org6	Twitter	2020-12-17	The December issue of the Academy Journal offers you #CPEUs and lots of valuable learning! Raising handsOpen book Access the quizzes online: https://sm.eatright.org/JANDquizzes #eatrightPRO #RDN #NDTR #CPE #CPEU	1
773	Org6	Twitter	2020-12-17	retweet colleagues: Take action today, add your support to help ensure nutrition security: http://eatrightpro.org/action-center These policy priorities in #FoodSecurity plus @SchoolLunch @NatWICAssoc and @fractweets are in this bill. Tell Congress: the time is NOW for #COVID19 relief	1
774	Org6	Twitter	2020-12-17	2020-2021 Academy President, Linda T. Farr, RDN, CSOWM, LD, FAND addresses members and colleagues on issues of diversity and inclusion in her latest message. Read the Message From the Academy President: https://sm.eatright.org/LastingChange121720	1
775	Org6	Twitter	2020-12-17	retweet @eatrightPRO policy priorities in #FoodSecurity plus @SchoolLunch @NatWICAssoc and @fractweets included in this bill. Tell Congress: the time is now for #COVID19 relief. Take action today and add your support to help ensure nutrition security: http://eatrightpro.org/action-center #eatrightPRO	1
776	Org6	Twitter	2020-12-17	retweet Looking for CPEU? The Academy offers a variety of webinars on topics such as sports nutrition, diversity and inclusion, medical nutrition therapy, professional development and more! Get started: https://sm.eatright.org/webinarseries #eatrightPRO #RDNCPE @eatrightPRO	1
777	Org6	Twitter	2020-12-17	retweet Tell Congress: the time is now for COVID-19 relief. Take action today and add your support to help ensure nutrition security: https://eatrightpro.org/action-center #eatrightPRO #nutritioneducation @NEPDPG	1
778	Org6	Twitter	2020-12-17	We're looking forward to 2021, aren't you?? One thing we're looking forward to is #NationalNutritionMonth in March! Hugging face Start preparing with themed gifts, materials and other celebratory items. Check out the 2021 National Nutrition Month catalog: https://sm.eatright.org/NNMcatalog	1
779	Org6	Twitter	2020-12-17	Academy policy priorities are included in this bill. Tell Congress: the time is now for COVID-19 relief. Take action today and add your support to help ensure nutrition security: https://eatrightpro.org/action-center #eatrightPRO	1
780	Org6	Twitter	2020-12-17	The Diversity and Inclusion Leaders Program supports Active #eatrightPRO members from underrepresented groups within the #nutrition and #dietetics profession. Learn more about the two-year leadership program and apply by March 1:	1
781	Org6	Twitter	2020-12-17	Take action today and urge your member of Congress to add their support to the Emergency #Coronavirus Relief Act, which includes funding for many top Academy priorities: https://sm.eatright.org/actionalert #eatrightPRO #rdchat	1
782	Org6	Twitter	2020-12-17	The Academy's Research Priorities 2020 were recently released. Learn more about the priorities, which are intended as a resource for internal and external stakeholders: https://sm.eatright.org/JANDresearchpriorities2020 #eatrightPRO #nutrition #dietetics #research	1
783	Org6	Twitter	2020-12-17	The Academy encourages diversity and inclusion, and commits to doing more to address systemic racism and pervasive inequities. View our diversity and inclusion resources, including awards, grants, scholarships, articles, webinars and more: https://sm.eatright.org/diversityresources #eatrightPRO	1
784	Org6	Twitter	2020-12-16	Stay connected with the Academy’s action alerts and legislative updates! Text "eatright" to 50457 to enroll in text alerts. Mobile phonePolice cars revolving light You also can opt in by marking the “Send me text alerts” box whenever you complete an action alert. #eatrightPRO #nutrition #dietetics	1
785	Org6	Twitter	2020-12-16	"Communicating Nutrition" addresses the knowledge and skills needed to develop and deliver all types of communication in a variety of settings. See how students, interns and practitioners alike can benefit from this resource: https://sm.eatright.org/communicatingnutritionprint #eatrightPRO #dietetics	1
786	Org6	Twitter	2020-12-16	Each issue of @FoodNutriMag offers Academy members 2 CPEUs for free! Learn more about accessing the magazine and self-study quizzes via the Academy's learning management system, eatrightCPE: https://sm.foodnutrimag.org/CPEU #eatrightPRO #dietitians #dietetics	1
787	Org6	Twitter	2020-12-16	retweet Help Medicare beneficiaries get coverage on much needed treatment for chronic conditions by taking action and urging your member of Congress to support the #MNTAct, which would expand access to medical nutrition therapy: https://sm.eatright.org/actionalert #eatrightPRO	1
788	Org6	Twitter	2020-12-16	As an Academy media spokesperson, you can help share healthful eating messaging and the importance of working with a registered #dietitian nutritionists for expert information! NewspaperRadioPersonal computerTelevision Learn more about the program and apply by February 5: https://sm.eatright.org/spokesperson #eatrightPRO	1
789	Org6	Twitter	2020-12-16	retweet Take action today! Urge your member of Congress to support the #MNTAct, which allows Medicare beneficiaries coverage of medical nutrition therapy for obesity, cancer, high blood pressure, prediabetes, dyslipidemia and more: https://sm.eatright.org/actionalert #eatrightPRO	11	medical nutrition therapy
790	Org6	Twitter	2020-12-16	The Evidence Analysis Center published a scoping review on Food as Medicine interventions in the #retail space. To learn more about effective interventions and possibilities to engage RDNs, visit https://sm.eatright.org/EACretailnutrition. #eatrightPRO #nutrition #healthcare	1
791	Org6	Twitter	2020-12-15	The Academy’s landmark volunteer media Spokesperson Program advances the Academy’s mission and goals and increases the public’s knowledge of food, nutrition and health. The application deadline is February 5. https://eatrightpro.org/media/meet-our-spokespeople/spokespeople/become-an-academy-media-spokesperson @fcpdpg #RDchat @eatrightPRO #Dietetics	1
792	Org6	Twitter	2020-12-15	The Academy is collaborating with @UofNorthFlorida to recruit RDNs for a study looking at the documentation of #breastfeeding and #lactation support provided to infants and the individuals providing them human milk. Learn more: https://sm.eatright.org/BFregistry #eatrightPRO #dietetics	1
793	Org6	Twitter	2020-12-15	Will you be campaigning in the Academy's 2021 election? If so, be sure to follow these National Campaign Rules, including when to begin campaigning: https://sm.eatright.org/campaignguidelines #eatrightPRO #dietetics #dietitians	1
794	Org6	Twitter	2020-12-15	retweet Looking for CPEU? The Academy offers a variety of webinars on topics such as sports nutrition, diversity and inclusion, medical nutrition therapy, professional development and more! Get started: https://sm.eatright.org/webinarseries #eatrightPRO #RDNCPE	1
795	Org6	Twitter	2020-12-15	ICYMI: The Academy and CDR Nominating Committees announced the slate of candidates for the 2021 national ballot: https://sm.eatright.org/election Check back later this month for candidate bios. Thanks again to everyone who participated in the nominations process! #eatrightPRO #dietetics	1
796	Org6	Twitter	2020-12-15	retweet Applications for the Diversity and Inclusion Leaders Program, a 2-year program that supports Active members from underrepresented groups within the dietetics profession, are now open and accepted through March 1, 2021. https://eatrightpro.org/leadership/honors-and-awards/diversity-awards-and-grants/diversity-leaders-program-award #eatrightpro #diversity #inclusion	1
797	Org6	Twitter	2020-12-14	Read the November issue of MNT Provider for more information about National #Diabetes Month, a free webinar on #CKD, what Reimbursement Representatives do, and more: https://sm.eatright.org/mntprovider #dietetics #dietitian #eatrightPRO	1
798	Org6	Twitter	2020-12-14	The Academy is seeking nominations for national honors and awards! TrophyGrinning face with smiling eyes Please submit an intent to nominate by January 15, 2021. All nominations are due March 1, 2021. Learn about the awards: https://sm.eatright.org/honoraward #eatrightPRO #nutrition #dietetics #NDTR #RDN	1
799	Org6	Twitter	2020-12-14	Whether you're a candidate or engaged Academy member, you can take an active role in the Academy's election process! Join us tomorrow, Dec. 15, for an interactive webinar about the rules and strategies to run a successful campaign. Register: https://sm.eatright.org/electionwebinar #eatrightPRO	1
800	Org6	Twitter	2020-12-14	retweet Healthy, Hunger-Free Kids Act celebrates 10 yrs, @eatrightPRO recognizes roles #SNSDPG42 members in developing/implementing to ensure all children have access to nutritious food at school https://sm.eatright.org/HHFKA10years #HHFKAturns10 @StefanieDoveRDN @rdliz @JeanneReilly16 @JeanRagalieRD	1
801	Org6	Twitter	2020-12-14	Take Action Today to Prevent Medicare Payment Cuts for RDNs: https://eatrightpro.org/advocacy/take-action/action-center #takeaction #rdchat @eatrightRaleigh @eatrightPRO @eatright_dchda @eatrightcda	1
802	Org6	Twitter	2020-12-14	As the Healthy, Hunger-Free Kids Act celebrates 10 years, the Academy recognizes the role its members played in developing and implementing this important legislation, which helps ensure all children have access to nutritious food: https://sm.eatright.org/HHFKA10years Clapping hands sign #eatrightPRO #HHFKA	1
803	Org6	Twitter	2020-12-12	The Academy Foundation is now accepting applications for select awards and research grants! Opportunities are available for #nutrition and #dietetics professionals and students. Learn more and apply by February 1 at 11:59 p.m. CT: https://sm.eatright.org/FoundationAppPortal #eatrightPRO #futureRDN	1
804	Org6	Twitter	2020-12-12	Looking for extra #CPE? Simply read the December Journal and take the four available quizzes! Raising hands Access the quizzes using your Academy login: https://sm.eatright.org/JANDquizzes #eatrightPRO #RDN #NDTR #CPEU	1
805	Org6	Twitter	2020-12-11	retweet Looking for CPEU? The Academy offers a variety of webinars! Get started: https://ed.gr/czhy7 #eatrightPRO #RDNCPE	1
806	Org6	Twitter	2020-12-11	Have you been #cooking more at home? Get the #NationalNutritionMonth Kitchen Essentials Kit! It includes a tote bag, apron, citrus juicer, zester, cutting board and more. Shop the 2021 National Nutrition Month catalog: https://sm.eatright.org/NNMcatalog #eatright #eatrightPRO #nutrition	1
807	Org6	Twitter	2020-12-11	The 2-year Diversity and Inclusion Leaders Program provides education, access and service opportunities to individuals from underrepresented groups in the #nutrition and #dietetics community. Learn more and apply by March 1: https://sm.eatright.org/divldrpgm #eatrightPRO #dietitians	1
808	Org6	Twitter	2020-12-11	We want YOU to be part of the Academy's 2021 national election! Register to attend the December 15th webinar, "Winning Strategies to Run a Successful Campaign." Ballot box with ballot Sign up: https://sm.eatright.org/electionwebinar #eatrightPRO #dietetics #rdchat #dietitians	1
809	Org6	Twitter	2020-12-11	ACEND is developing a library of reputable educational materials to assist #nutrition and #dietetics faculty and preceptors on the topic of Diversity, Equity and Inclusion. View current webinar offerings and visit frequently for updated materials: https://sm.eatright.org/ACENDDiversityInclusion #RDN	1
810	Org6	Twitter	2020-12-11	According to a new study published in the Academy Journal, changes in the food environment around low-income and high-ethnic/racial minority populations over time impact childhood obesity. Read the full press release to learn more: https://sm.eatright.org/jrnlPRnewstores #eatrightPRO #rdchat	5	social amd economic issues (low-income amd high-ethnic/racial minority populations)
811	Org6	Twitter	2020-12-10	Please take action today and urge your U.S. Representative to sponsor H.R. 8702 to prevent the 5 percent cut in Medicare Part B payments for RDNs, which is set to take effect on January 1. Take action now: https://sm.eatright.org/actionalert #eatrightPRO #RDN	1
812	Org6	Twitter	2020-12-10	Cheer on a fellow registered #dietitian competing on @Jeopardy ! Clapping hands signEyesTelevision Good luck, Kendra Blanchette! https://jeopardy.com/contestant-zone	1
813	Org6	Twitter	2020-12-10	retweet Looking for CPEU? The Academy offers a variety of webinars on topics such as sports nutrition, diversity and inclusion, medical nutrition therapy, professional development and more! Get started: https://sm.eatright.org/webinarseries #eatrightPRO #RDNCPE #rdchat	1
814	Org6	Twitter	2020-12-10	Help increase the public's knowledge of food, nutrition and health and establish the RDN as the public's best source for nutrition information by becoming an #eatrightPRO Spokesperson. Three-year Spokesperson terms begin June 1, 2021. Apply by Feb. 5:	1
815	Org6	Twitter	2020-12-10	retweet Woohoo...way to go @VandanaShethRD You make us all proud. #RDN #eatrightpro @MIG_IND	1
816	Org6	Twitter	2020-12-10	retweet Take action now: urge your Representative to support health care providers by sponsoring H.R. 8702 http://votervoice.net/Shares/BNehgAI6ACmITAVT0YX7EAA Easy and quick to complete. Make our voices heard. @eatrightPRO @ddpg	1
817	Org6	Twitter	2020-12-09	The Academy and CDR Nominating Committees are happy to announce the slate of candidates for the 2021 national ballot: https://sm.eatright.org/election Candidate bios will be posted in late December. Thanks to all who participated in the nominations process! #eatrightPRO #dietetics	1
818	Org6	Twitter	2020-12-09	The Academy's Evidence Analysis Library is seeking registered #dietitian nutritionists with #research experience to serve as lead analyst for EAL systematic reviews and guidelines! Learn about this role and apply by January 8: https://sm.eatright.org/EALinvolved #eatrightPRO #rdchat	1
819	Org6	Twitter	2020-12-09	Use the Academy's quarterly social media toolkits for easy-to-share messaging, important dates for #nutrition and #dietetics pros, celebratory days and months, and more: https://sm.eatright.org/SMtoolkits #eatrightPRO #rdchat	1
820	Org6	Twitter	2020-12-09	retweet The Academy offers a variety of convenient, engaging educational opportunities all year long! Learn more about these resources: http://ed.gr/csxh0 #eatrightPRO	1
821	Org6	Twitter	2020-12-09	WEBINAR: #FoodAllergies in #FoodService: Back of House Training for Front of House Results Join us Dec. 10 at noon CT to learn about training BOH teams, guidelines and opportunities for labeling, service and more. Register to attend: https://sm.eatright.org/foodallergiesfoodservice #eatrightPRO	1
822	Org6	Twitter	2020-12-09	retweet Free and open to Academy members, the Mentor Match program connects you with a mentor or mentee who best fits your professional areas of interest, communication style and availability. Learn more about this resource: https://sm.eatright.org/mentormatch #eatrightPRO	1
823	Org6	Twitter	2020-12-09	retweet DYK the #MNTAct amends the Social Security Act to help provide coverage of MNT for Medicare Part B beneficiaries with diet-related chronic diseases and allows more type of providers to refer their patients for MNT? https://sm.eatright.org/MNTact #eatrightPRO	1
824	Org6	Twitter	2020-12-08	Now's your chance to express interest in serving as a volunteer on an Academy committee! Learn about the available committee positions and complete this survey by Thursday, January 21: https://sm.eatright.org/opptosrvsurvey #eatrightPRO #dietetics #dietitian	1
825	Org6	Twitter	2020-12-08	Read the November MNT Provider for information about National #Diabetes Month, how your Reimbursement Representative can help with questions about coverage and payment in your state or area of practice and more! Log in to view: https://sm.eatright.org/mntprovider #eatrightPRO #dietetics	1
826	Org6	Twitter	2020-12-08	Do you plan to be active in the Academy's 2021 national election? Be sure to register for the December 15th webinar, "Winning Strategies to Run a Successful Campaign." Ballot box with ballot Sign up now: https://sm.eatright.org/electionwebinar #eatrightPRO #dietetics #rdchat #dietitians	1
827	Org6	Twitter	2020-12-07	The Academy's #Breastfeeding Registry Study aims to examine the documentation practices of #RDNs working in areas related to breastfeeding/lactation practice. We're currently recruiting RDNs who provide care to this population. Learn more and get involved: https://sm.eatright.org/BFregistry	1
828	Org6	Twitter	2020-12-07	#FoodAllergies affect all #foodservice settings, making quality food allergen training critical. This webinar explains the importance of training back of house teams, reviews guidelines and showcases opportunities for labeling, service and more. Register:	1
829	Org6	Twitter	2020-12-07	Nominate a #nutrition and #dietetics professional for the Academy's honors and awards! Intent to nominate due Jan. 15 for the Excellence in Practice Award, Outstanding NDTR Award, Excellence in Diversity and Inclusion Promotion Award and more. Trophy Details:	1
830	Org6	Twitter	2020-12-07	retweet Looking for CPEU? The Academy offers a variety of webinars on topics such as sports nutrition, diversity and inclusion, medical nutrition therapy, professional development and more! Get started: https://sm.eatright.org/webinarseries #eatrightPRO #RDNCPE	1
831	Org6	Twitter	2020-12-07	retweet Free and open to Academy members, the Mentor Match program connects you with a mentor or mentee who best fits your professional areas of interest, communication style and availability. Learn more about this resource: https://sm.eatright.org/mentormatch #eatrightPRO @eatrightPRO	1
832	Org6	Twitter	2020-12-07	retweet Looking for CPEU? The Academy offers a variety of webinars on topics such as sports nutrition, diversity and inclusion, medical nutrition therapy, professional development and more! Get started: https://sm.eatright.org/webinarseries #eatrightPRO #RDNCPE #DDPG	1
833	Org6	Twitter	2020-12-06	retweet Urge Congress to support the MNT Act of 2020 - Take action today! #eatrightPRO http://votervoice.net/Shares/BP4CkAI6AC-dSAnIuXX7EBA	1
834	Org6	Twitter	2020-12-04	retweet When assessing for and treating patients or clients with #malnutrition, RDNs can benefit from collaborating with fellow #healthcare professionals such as physical therapists. Here's how! #foodnutrimag #eatrightPRO	1
835	Org6	Twitter	2020-12-05	retweet Urge Congress to support the MNT Act of 2020 - Take action today! #eatrightPRO http://votervoice.net/Shares/BKmTJAI6AC-dSAJaeXX7EBA	1
836	Org6	Twitter	2020-12-05	Updated with the latest information and tools, the Academy's #Coronavirus Professional Resource Hub is available for food, #nutrition and #health professionals to address preparedness, patient care and #foodsafety and access during the #COVID19 pandemic.	1
837	Org6	Twitter	2020-12-04	Whether you're a candidate in the Academy's 2021 election or an engaged #eatrightPRO member, you can play an active role in the election process! Register to attend the webinar "Winning Strategies to Run a Successful Campaign" on Dec. 15 at 1 p.m. CT: https://sm.eatright.org/electionwebinar	1
838	Org6	Twitter	2020-12-04	Would you like to serve on an Academy committee in our 2021-2022 program year and beyond? Complete this survey by Thursday, January 21 to express which committees are of interest to you and for which you are most qualified: https://sm.eatright.org/opptosrvsurvey #eatrightPRO #dietetics #rdchat	1
839	Org6	Twitter	2020-12-04	Register for "A Resource for All Members: The Academy's Current Research Priorities" on Dec. 8 at noon CT to hear about outcomes of a 2-year process that gathered member-driven #research ideas to help define the Academy’s research priorities. https://sm.eatright.org/Academyresearchpriorities #eatrightPRO	1
840	Org6	Twitter	2020-12-04	The Academy's Diversity and Inclusion Action Award provides $1000 to an eligible #dietetics education program, affiliate, DPG, MIG or recognized Academy group for successful recruitment and retention of diverse members. Learn more and apply: https://sm.eatright.org/divactawrd #eatrightPRO	1
841	Org6	Twitter	2020-12-04	Get your learn on (and get your CPE) in December by reading the articles from the Academy Journal's December issue. Access Journal quizzes via the MyCDRGo app or online at https://sm.eatright.org/JANDquizzes. #eatrightPRO #CPE	1
842	Org6	Twitter	2020-12-03	Share the Academy's key messages with patients or clients, consumers and fellow dietetics and nutrition professionals! Our quarterly social media toolkits are full of celebratory dates, key initiatives, sample social media posts and more: https://sm.eatright.org/SMtoolkits #eatrightPRO	1
843	Org6	Twitter	2020-12-03	RDNs are facing a 5% cut in their Medicare Part B Payments set to take effect on January 1, 2021. Take action today and urge your U.S. Representative to support health care providers by sponsoring H.R. 8702 and push back against these cuts: https://sm.eatright.org/actionalert #eatrightPRO	1
844	Org6	Twitter	2020-12-03	Share your stories about older adult patients that illustrate the effectiveness of MNT services or a time you were unable to see a patient due to lack of Medicare coverage for their disease state or condition. Please log in to share your story:	1
845	Org6	Twitter	2020-12-03	retweet The Academy of Nutrition and Dietetics Foundation offers numerous #scholarships for #dieteticstudents. Get info on these from your dietetic program advisor or go to the Academy's Scholarship website: https://bit.ly/eatrschol @eatright @eatrightPRO #RD2BE #futureRD #Students	1
846	Org6	Twitter	2020-12-03	retweet Looking for CPEU? The Academy offers a variety of webinars on topics such as sports nutrition, diversity and inclusion, medical nutrition therapy, professional development and more! Get started: https://ed.gr/czhy6 #eatrightPRO #RDNCPE	1
847	Org6	Twitter	2020-12-03	A live Dec. 10 webinar, "Food Allergies in Food Service: A Back of House Training for Front of House Results," will provide practical training and allergy safety applications for alternative operations and a variety of settings. Learn more: https://sm.eatright.org/foodallergiesfoodservice #eatrightPRO	1
848	Org6	Twitter	2020-12-02	Join us Dec. 8 at noon CT for "A Resource for All Members: The Academy's Current #Research Priorities." Speakers will share outcomes of a 2-year process that gathered member-driven research ideas to help define research priorities: https://sm.eatright.org/Academyresearchpriorities #eatrightPRO #rdchat	1
849	Org6	Twitter	2020-12-02	Do you work with patients or clients who have #thyroid disease? Check out the recently released "#Health Professional's Guide to #Nutrition Management of Thyroid Disease" for guidelines, sample food plans and more. Green book Print: https://sm.eatright.org/NutrMgmtThyroidprint eBook:	1
850	Org6	Twitter	2020-12-02	Every two years, the Academy selects four applicants to participate in the two-year #Diversity and Inclusion Leaders Program. Learn more about the program goals, applicant qualifications and more: https://sm.eatright.org/divldrpgm Deadline to apply: March 1, 2021 Calendar #eatrightPRO #rdchat	1
851	Org6	Twitter	2020-12-02	When it comes to advocacy, Academy members work on a broad range of issues, improving America's #nutrition and #health status. Access webinars, resources on public policy issues, training to help you effectively communicate with elected officials and more: https://sm.eatright.org/advocacy	1
852	Org6	Twitter	2020-12-02	retweet Nominations for the Academy’s National Honors and Awards are open! Nominate a colleague who has advanced the nutrition and dietetics profession, exhibited leadership in the field and shown devotion to serving others: https://sm.eatright.org/2021honorsawards #eatrightPRO	1
853	Org6	Twitter	2020-12-02	Nominate colleagues and fellow #nutrition and #dietetics pros for the Academy's national honors and awards, including the Marjorie Hulsizer Copher Award, Lenna Frances Cooper Lecture, Medallion Award and more. Submit an intent to nominate by Jan. 15:	1
854	Org6	Twitter	2020-12-01	#RDNs are facing a 5% cut in #Medicare Part B Payments set to take effect Jan. 1. Urge your U.S. Representative to support #healthcare providers by sponsoring the bipartisan Holding Providers Harmless from Medicare Cuts During COVID-19 Act (H.R. 8702): https://sm.eatright.org/actionalert	1
855	Org6	Twitter	2020-12-01	Good news! Smiling face with open mouth and tightly-closed eyes The Academy's #CyberMonday has been extended through tomorrow, December 2. Shop now and use the code CYBER20 at checkout to get 20% off these 20 essential nutrition resources: https://sm.eatright.org/cybermondaysale #eatrightPRO #dietetics #futureRDN #dietitian #rdchat	1
856	Org6	Twitter	2020-12-01	retweet It's #GivingTuesday! ⁣ ⁣ Please consider donating to the 𝐀𝐍𝐃 𝐅𝐨𝐮𝐧𝐝𝐚𝐭𝐢𝐨𝐧 here: http://ow.ly/bIKv50CyP9b and/or Take Action Today with 𝐀𝐜𝐚𝐝𝐞𝐦𝐲 𝐀𝐜𝐭𝐢𝐨𝐧 𝐀𝐥𝐞𝐫𝐭𝐬 here: http://ow.ly/83QL50CyP99	1
857	Org6	Twitter	2020-12-01	Today is #GivingTuesday, a chance to support causes near and dear to your heart. Folded hands Please consider donating to the Academy Foundation, the only charitable organization devoted exclusively to the profession of #nutrition and #dietetics: https://sm.eatright.org/donate #eatrightPRO	1
858	Org6	Twitter	2020-12-01	The Academy offers many resources for nutrition and dietetics professionals to further their education from the comfort of home! Review this list of convenient options: https://sm.eatright.org/learningdistance #eatrightPRO #RDNCPE	1
859	Org6	Twitter	2020-12-01	retweet #GivingTuesday #AcademyofNutritionandDietetics Foundation. Devoted to promoting nutrition & dietetics, funding health & nutrition research as well as improving the health of communities through public nutrition education programs. #eatrightpro #eatright https://eatrightfoundation.org/get-involved/donate/	1
860	Org6	Twitter	2020-12-01	retweet Help Medicare beneficiaries get coverage on much needed treatment for chronic conditions by taking action and urging your member of Congress to support the #MNTAct, which would expand access to medical nutrition therapy: https://sm.eatright.org/actionalert #eatrightPRO	1
861	Org6	Twitter	2020-12-01	LAST CALL! Today's the deadline to participate in the Academy's Get a Member — Get a Dues Credit referral program. You know the value of membership firsthand! Share this insight with colleagues and peers so you both can benefit. Learn more: https://sm.eatright.org/getamember #eatrightPRO	1
862	Org6	Twitter	2020-11-30	Join us on Dec. 15 at 1 p.m. CT for the webinar "Winning Strategies to Run a Successful Campaign." Whether you're a candidate in the Academy's 2021 election or an engaged #eatrightPRO member, take an active role in the election process! Register: https://sm.eatright.org/electionwebinar	1
863	Org6	Twitter	2020-11-30	Are you interested in representing the #nutrition and #dietetics profession on a national level with the Academy? Learn about our media spokesperson program, and apply by February 5: https://sm.eatright.org/spokesperson #eatrightPRO #rdchat #dietitians	1
864	Org6	Twitter	2020-11-30	Register for this webinar happening Dec. 3 at noon CT to learn about tools RDNs can use to screen for feeding dysfunction in children, plus an in-depth analysis of a recent study on current screening practices. Sign up: https://sm.eatright.org/screenfeedingdysfunction #eatrightPRO #rdchat #pediatrics	1
865	Org6	Twitter	2020-11-30	Tomorrow is #GivingTuesday, a day of generosity to support causes near and dear to your heart. Please support the only Foundation devoted exclusively to the profession of #nutrition and #dietetics by donating online. Folded hands https://sm.eatright.org/donate #eatrightPRO #rdchat	1
866	Org6	Twitter	2020-11-30	#CyberMonday is here! Money-mouth face Get a 20% discount on 20 essential nutrition resources on eatrightSTORE. Enter the code CYBER20 at checkout to receive the discount today: https://sm.eatright.org/cybermondaysale #eatrightPRO #dietetics #dietitian #futureRDN	1
867	Org6	Twitter	2020-11-28	retweet There is currently neither a hearing nor a vote scheduled for the MNT Act. Gaining additional co-sponsors will help progress us toward those goals, so please contact your members of Congress about the bill: https://sm.eatright.org/actionalert #MNTAct #eatrightPRO #RegisteredDietitian	1
868	Org6	Twitter	2020-11-29	SPECIAL OFFER! Party popperRaising hands Right now, you can get the #CyberMonday 20% discount on the "Choose Your Foods Client Education Sampler Pack." Enter the code CYBER20 at checkout: https://sm.eatright.org/cybermondaysale #eatrightPRO #nutrition #dietetics #rdchat #dietitians	1
869	Org6	Twitter	2020-11-28	SCORE! Raising handsSmiling face with open mouth and smiling eyes Get the #CyberMonday 20% discount on "Eatright Essentials: Complete Client Education Library" starting today. Enter code CYBER20 at checkout: https://sm.eatright.org/cybermondaysale #eatrightPRO #nutrition #dietetics #dietitian #registereddietitian #rdchat	1
870	Org6	Twitter	2020-11-27	While shopping on #BlackFriday, take advantage of this deal! Get 20% off "Six Factors to Fit" book and "Six Factors to Fit: An Introduction to a Tailored Weight Management Approach" webinar with code CYBER20 at checkout: https://sm.eatright.org/cybermondaysale #eatrightPRO #CyberMonday	1
871	Org6	Twitter	2020-11-27	SURPRISE! Smiling face with open mouth and tightly-closed eyes Starting today, you can take advantage of the #CyberMonday 20% discount on "Making Nutrition Your Business: Building a Successful Private Practice, 2nd Ed." Enter code CYBER20 at checkout: https://sm.eatright.org/cybermondaysale #eatrightPRO #nutrition #dietetics #futureRDN #rd2be	1
872	Org6	Twitter	2020-11-26	The Academy Foundation has a global impact on the #nutrition and #dietetics profession through scholarships, awards, research grants, fellowships and disaster relief. Folded handsEarth globe americas Please remember the Foundation with a gift on #GivingTuesday. https://sm.eatright.org/donate #eatrightPRO #rdchat	1
873	Org6	Twitter	2020-11-25	Looking for ways to advance your career? Join an Academy dietetic practice group or member interest group to network and grow your knowledge! Learn more and join Academy groups: https://sm.eatright.org/academygroups #eatrightPRO #rdchat #dietetics	1
874	Org6	Twitter	2020-11-25	How has #COVID19 impacted your life and work? What are your immediate concerns, and what do you think the long-term future may look like? We're here to listen — and your input can help us develop tools and member benefits. Share thoughts: https://sm.eatright.org/submitCOVIDstories #eatrightPRO	1
875	Org6	Twitter	2020-11-25	Join April Litchford, PhD, RDN, CD, to learn about tools RDNs can use to screen for feeding dysfunction in children, plus an analysis of a recent study on current screening practices. Register for this webinar happening Dec. 3 at noon CT: https://sm.eatright.org/screenfeedingdysfunction #eatrightPRO	1
876	Org6	Twitter	2020-11-25	These audience-specific flyers are available to help #eatrightPRO members promote integrating registered #dietitian nutritionists into primary care practices, communicate the effectiveness of medical nutrition therapy services provided by #RDNs and more: https://sm.eatright.org/promotenutritionservices	1
877	Org6	Twitter	2020-11-25	Help Medicare beneficiaries get coverage on much needed treatment for chronic conditions by taking action and urging your member of Congress to support the #MNTAct, which would expand access to medical nutrition therapy: https://sm.eatright.org/actionalert #eatrightPRO	1
878	Org6	Twitter	2020-11-25	#CyberMonday Sale! On November 30, we're offering a 20% discount on 20 essential nutrition resources. Enter the code CYBER20 at checkout to receive the discount: https://sm.eatright.org/cybermondaysale Stay tuned for surprise discounts starting Thursday, November 26th! #eatrightPRO #dietetics	1
879	Org6	Twitter	2020-11-25	As the #COVID19 pandemic continues, nutrition and dietetics practitioners remain on the front lines addressing food safety and access, patient care and more. Stay up to date with these resources, webinars, an interactive Q&A and information: https://sm.eatright.org/COVID-19Info #eatrightPRO	1
880	Org6	Twitter	2020-11-25	retweet DYK the #MNTAct amends the Social Security Act to help provide coverage of MNT for Medicare Part B beneficiaries with diet-related chronic diseases and allows more type of providers to refer their patients for MNT? https://sm.eatright.org/MNTact #eatrightPRO	1
881	Org6	Twitter	2020-11-24	December issue articles offering CPE are now available from the Academy Journal! Find them here: https://sm.eatright.org/jrnlCPE Open book When you're ready, access Journal quizzes through the MyCDRGo app or at https://sm.eatright.org/JANDquizzes. #eatrightPRO #RDNCPE	1
882	Org6	Twitter	2020-11-24	As an Academy member, you know the value of membership firsthand! Share that insight with colleagues and peers before December 1 to take advantage of the Get a Member — Get a Dues Credit referral program. Learn how you BOTH can benefit: https://sm.eatright.org/getamember #eatrightPRO	1
883	Org6	Twitter	2020-11-24	retweet Take action today! Urge your member of Congress to support the #MNTAct, which allows Medicare beneficiaries coverage of medical nutrition therapy for obesity, cancer, high blood pressure, prediabetes, dyslipidemia and more: https://sm.eatright.org/actionalert #eatrightPRO	11	medical nutrition therapy
884	Org6	Twitter	2020-11-24	The Academy's honors and awards honor individuals who demonstrate strong leadership, devotion to serving others and work to advance the field of #nutrition and #dietetics. Clapping hands sign Get more details and submit nominations: https://sm.eatright.org/honoraward #eatrightPRO #RDN #NDTR	11	medical nutrition therapy
885	Org6	Twitter	2020-11-24	retweet Urge the Senate to pass a COVID-19 stimulus package and prioritize nutrition. #eatrightPRO #SNAP http://votervoice.net/Shares/Bqa6iAI6ACt8SAzLzTX7EAA	1
886	Org6	Twitter	2020-11-24	Take action today! Urge your member of Congress to support the #MNTAct, which allows Medicare beneficiaries coverage of medical nutrition therapy for obesity, cancer, high blood pressure, prediabetes, dyslipidemia and more: https://sm.eatright.org/actionalert #eatrightPRO	11	medical nutrition therapy
887	Org6	Twitter	2020-11-23	Academy Student Liaisons communicate member initiatives, messages and other information to Student Dietetics Associations/Clubs. Plus, they can enhance their resume, develop leadership skills and more! School satchelSpeech balloon Apply now: https://sm.eatright.org/stuliaison #futureRDN #rd2be #eatrightPRO	11	medical nutrition therapy
888	Org6	Twitter	2020-11-23	The Academy offers many resources for nutrition and dietetics professionals to further their education from the comfort of home! Review this list of convenient options: https://sm.eatright.org/learningdistance #eatrightPRO #RDNCPE	1
889	Org6	Twitter	2020-11-23	ICYMI: Hear from some of the many nutrition and dietetics professionals on the front lines during the #COVID19 pandemic. #eatrightPRO #rdchat #dietitian	1
890	Org6	Twitter	2020-11-23	#GivingTuesday is next week. HandshakeFolded hands Please mark your calendar and consider donating to the Academy Foundation to help provide awards, grants and scholarships to deserving individuals in the #nutrition and #dietetics profession. https://sm.eatright.org/donate #eatrightPRO #rdchat	1
891	Org6	Twitter	2020-11-23	Do you want to help amplify the Academy's healthful eating messaging and promote the registered #dietitian nutritionist to the general public? Apply by Feb. 5, 2021, to become an Academy Media Spokesperson! Speaking head in silhouetteStudio microphone Log in for more info: https://sm.eatright.org/spokesperson #eatrightPRO	1
892	Org6	Twitter	2020-11-22	retweet Urge the Senate to pass a COVID-19 stimulus package and prioritize nutrition. #eatrightPRO #SNAP http://votervoice.net/Shares/BAljgAI6ACt8SA5gMTX7EAA	1
893	Org6	Twitter	2020-11-21	retweet DYK the #MNTAct amends the Social Security Act to help provide coverage of MNT for Medicare Part B beneficiaries with diet-related chronic diseases and allows more type of providers to refer their patients for MNT? https://sm.eatright.org/MNTact #eatrightPRO	1
894	Org6	Twitter	2020-11-21	Meet some of the Academy Foundation's scholarship recipients, award winners and donors and hear from them about why they're involved with our Foundation: https://sm.eatright.org/FoundationVideos #eatrightPRO #nutrition #dietetics	1
895	Org6	Twitter	2020-11-20	#Eatright Essentials: The Complete Client Education Library contains five handout sets including Cooking Basics, Eating Healthy on a Budget, Healthy Meal Planning and Shopping, Heart-Healthy Eating, and Nutrient Library. View and purchase the set: https://sm.eatright.org/ERessentials	1
896	Org6	Twitter	2020-11-20	retweet The Academy offers many resources for nutrition and dietetics professionals to further their education from the comfort of home! Review this list of convenient options: https://sm.eatright.org/learningdistance #eatrightPRO #RDNCPE	1
897	Org6	Twitter	2020-11-20	The Academy’s state-of-the-art platform eatrightPREP can help you prepare for the RDN Exam! Want to try before you buy? Smiling face with open mouth and smiling eyesPersonal computer Visit https://sm.eatright.org/eatrightPREPdemo and click "Try It Out" to access a 7-day demo course. #eatrightPRO #futureRDN #rd2be	1
898	Org6	Twitter	2020-11-20	Want to network with fellow #nutrition and #dietetics professionals, share your expertise and expand your knowledge? Learn about Academy dietetic practice groups and member interest groups, including how to join: https://sm.eatright.org/academygroups #eatrightPRO #rdchat	1
899	Org6	Twitter	2020-11-20	Developed by the Academy to resonate with key audiences, these flyers can be used to promote the value of RDNs and MNT services. View the available flyers: https://sm.eatright.org/promotenutritionservices #eatrightPRO	1
900	Org6	Twitter	2020-11-19	Nominations for the Academy's National Honors and Awards open November 1! Nominate a colleague who has advanced the nutrition and dietetics profession, exhibited leadership in the field and shown devotion to serving others: https://ed.gr/czfet #eatrightPRO	1
901	Org6	Twitter	2020-11-19	Support the Academy's efforts to advocate for the #MNT Act. Share your stories about older adults that illustrate the effectiveness of MNT services or a time you may have been unable to see a patient due to lack of Medicare coverage: https://sm.eatright.org/MNTstories #eatrightPRO	1
902	Org6	Twitter	2020-11-19	This comprehensive reference provides guidance for dietitians, physicians, and other allied care professionals working with patients with thyroid disease. Learn more: https://sm.eatright.org/NutrMgmtThyroidprint #eatrightPRO #RDN #NDTR #thyroid	1
903	App3	Facebook	2021-01-29	No Phone. No Wallet. No Problem! #FitbitPay is your on-the-go and on-the-move wallet, that makes payments quick, easy and secure – with a single tap, without touching any public surfaces. Swipe it, cash it, move it – today!	1
904	App3	Facebook	2021-01-27	Awkwardly said 'you too' when the waiter wished you a pleasant meal? 😅 Get personalised insights about your sleep & follow guided programmes to help get a better nights rest with Fitbit Premium.	1
905	App3	Facebook	2021-01-25	How come I never forget to water my plants, but I need the Fitbit app for hydrating myself? 😅	1
906	App3	Facebook	2021-01-21	Why not try outdoor yoga whilst the weather is good? #FitbitInspire2 tracks 15+ workouts including Yoga, Pilates, Interval workout and more. #FitbitFriend	1
907	App3	Facebook	2021-01-18	We know it's easier said then done, but we're here for you 🙏 #FitbitVersa3	1
908	App3	Facebook	2021-01-13	Shout-out to anyone on a mission to live healthier! What do you aim to gain in 2021? 🤜🤛 #TheYearOfGain	1
909	App3	Facebook	2021-01-13	With #FitbitSense and 6 month free #FitbitPremium, you can track your progress, get deeper insights and know more about your fitness with simple taps just like our #Fitbitfriend @m_shobain	1
910	App3	Facebook	2021-01-10	That’s not that hard right (especially step 3)? Easily log your mood on Sense after an EDA Scan session or in the Fitbit app to help you reflect on what makes you feel your best 🤗 #FitbitSense #ItAllFitsTogether	1
911	App3	Facebook	2021-01-07	Never thought I'd enjoy walking this much 😂 From thinking of walking more often in 2020 to walking, walking and some more walking in 2021!	1
912	App3	Facebook	2021-01-01	Happy New Year! Congratulations, we all got through 2020 together! 2021 can only be better right?	1
913	App3	Facebook	2020-12-27	This badge is clearly fake as no one was able to pull this off during Christmas 😅	1
914	App3	Facebook	2020-12-18	You can add up to 6 credit or debit cards to your Fitbit Pay Wallet! Contactless, safe and an easy way to pay – Fitbit Pay! Let us know in the comments which bank/country you would like to have enabled on Fitbit Pay & we will work towards enabling it!	1
915	App3	Facebook	2020-12-17	Still wondering what gift you would like to get this season? Tag your loved ones to let them know about the #1 item in your Christmas Wishlist!	1
916	App3	Facebook	2020-12-16	🇧🇭 Fit, Fine, Turning 49! Wishing our Fitbit fam from Bahrain a Happy National Day! 🇧🇭	1
917	App3	Facebook	2020-12-15	Try a guided breathing session on our Fitbit trackers and smartwatches if you're in desperate need of peace of mind.	1
918	App3	Facebook	2020-12-13	Maybe this should be the last post you scroll down to tonight! #Goodnight #itallfitstogether	1
919	App3	Facebook	2020-12-04	Luckily hitting 10K is still a cause for celebration 🎉 Oh, and did we mention your Inspire 2 unlocks 1-year of free trial* of Fitbit Premium? (*For new premium users only)	1
920	App3	Facebook	2020-12-02	Growing stronger together! Wishing everyone in the UAE a Healthy & Happy 49th National Day! 🇦🇪 🇦🇪 🇦🇪 @officialuaend #SeedsOfTheUnion #UAENationalDay49	1
921	App3	Facebook	2020-12-01	30x30 is over, but this journey must continue! A big thank you to everyone who joined us at @DubaiFitnessChallenge #Fitbit30x30 #Dubai30x30 #ThankYou	1
922	App3	Facebook	2020-11-22	Smashed your 30 mins today? It’s now time to help your body recover with the right nutrition! Scroll to see some recommendations on how to build a balanced plate! #Dubai30x30 #Fitbit30x30 @dubaifitnesschallenge	1
923	App3	Facebook	2020-11-16	Stay strong until the end and beyond the Dubai Fitness Challenge with the new devices from Fitbit! #Dubai30x30 #Fitbit30x30 @dubaifitnesschallenge	1
924	App3	Facebook	2020-11-14	This Diwali give a gift that keeps on giving. Gift a Fitbit. Wishing everyone a healthy and safe Diwali	1
925	App3	Facebook	2020-11-13	Here are some tips from us to help you get through the 30x30! Get the complete picture with Fitbit this Dubai Fitness Challenge! #Fitbit30x30 #Dubai30x30 @dubaifitnesschallenge	1
926	App3	Facebook	2020-10-29	30 Minutes. 30 Days. One Challenge. This year, get the complete picture with Fitbit! #Fitbit30x30 #Dubai30x30 @dubaifitnesschallenge	1
927	App3	Facebook	2020-10-28	Take a pick this 30x30 because we've got you covered! Track with 20+ workout modes on #FitbitSense! #Fitbit30x30 #Dubai30x30 @dubaifitnesschallenge	1
928	App3	Facebook	2020-10-27	While 30 minutes of activity is important for being healthy - Nutrition, Sleep and Stress management are important too! Level up your Fitbit device experience with the 90-day free trial of #FitbitPremium, with deeper analysis of your data and more personalized insights that connect the dots across your activity, sleep and heart rate to help make you fitter, healthier and happier! #Fitbit30x30 #Du…	1
929	App3	Facebook	2020-10-26	This 30x30 we will give you workout ideas, access to advice and guidance to keep you motivated and on track too to hit 30x30! #Fitbit30x30 #Dubai30x30 @dubaifitnesschallenge	1
930	App3	Facebook	2020-10-22	We are excited to be the Official Health & Wellness partner of Dubai Fitness Challenge! It’s more important than ever that we all stay fit and healthy. Get ready with Fitbit to track your 30 mins for 30 days and beyond! #Fitbit30x30 #Dubai30x30 @dubaifitnesschallenge	1
931	App3	Facebook	2020-10-19	Designed to detect and manage #stess! #FitbitSense comes with an on-wrist EDA Scan app that detects electrodermal activity, which may indicate your body’s response to stress so you can better track and manage it! Sense includes a free 6-month Premium membership for even more ways to help you wind down and relax (new Premium users only).	1
932	App3	Facebook	2020-10-15	It's #GlobalHandwashingDay! Let this free smartwatch clock face remind you to wash your hands every hour and time you for the recommended 20 seconds each time you do. Find Clean Cues in the Fitbit app gallery to install. #HandHygieneforAll	1
933	App3	Facebook	2020-10-10	It's #WorldMentalHealthDay! In uncertain times, it’s normal to feel stressed, worried or anxious. Be sure to check in with yourself, and others as we try to navigate the ‘new normal’ together.	1
934	App3	Facebook	2020-10-07	3 new models to track your activity, sleep, stress and nutrition with the all new Fitbit line-up and Free Premium Trial!	1
935	App3	Facebook	2020-10-06	🎀 To those who are or were on their #breastcancer journey - this october, we extend our thoughts and warm wishes!	1
936	App3	Facebook	2020-09-29	Train Well, Eat Well, Sleep Well, Stay Healthy! This #WorldHeartDay, let’s make small changes to our lifestyle to keep our heart beating well! #UseHeart	1
937	App3	Facebook	2020-09-27	It’s your time to shine 🌟 Level up 🆙🆙 on your daily goals with #FitbitInspire2!	1
938	App3	Facebook	2020-09-26	Yes that's right! All NEW Fitbit devices packed with advanced health features are available to buy now - online & in-stores!	1
939	App3	Facebook	2020-09-24	Shopping. Coffee. Grocery. Everything! Use Fitbit Pay on #Sense & #Versa3 anywhere you see the contactless symbol!	1
940	App3	Facebook	2020-09-23	Wishing everyone good health and prosperity in the Kingdom of Saudi Arabia! Happy 90th National Day, let's grow stronger together!	1
941	App3	Facebook	2020-09-21	The weather is getting better! It's time to smash an outdoor workout! @amandarushforth	1
942	App3	Facebook	2020-09-20	Fitness comes down to getting that heart pumping. It’s why #Versa3 has Active Zone Minutes and buzzes when you hit your fat burn, cardio or peak zones—and more effort earns you 2x the minutes. Wonder if you’re hitting the recommended 150 mins a week? There’s only one way to find out 💦 Screen reader support enabled.	1
943	App3	Facebook	2020-09-16	No Phone! No Problem! You can leave your phone at home and still track your run on #FitbitVersa3 with built-in GPS.	1
944	App3	Facebook	2020-09-15	Keep track of your effort and not your Fitbit charger! New #Inspire2 has a 10-day battery so it keeps up all week & then some.	1
945	App3	Facebook	2020-09-13	With a new multi-path sensor and PurePulse 2.0 algorithm, #FitbitVersa3 is locked and loaded with our most advanced heart rate technology.	1
946	App3	Facebook	2020-09-08	The new #FitbitSense smartwatch features a seamless infinity band that’s super comfortable—and the new quick-release design makes it easier than ever to swap styles. 😏😏	1
947	App3	Facebook	2020-09-03	Want help managing your stress? That’s why we made #FitbitSense with an EDA Scan app that gauges your body’s stress response and gives you tools to manage it. Sense includes a free 6-month Premium membership for even more ways to help you wind down and relax (new Premium users only).	1
948	App3	Facebook	2020-08-31	More than an impressive phrase, the biosensor core on the new #FitbitSense packs a lot of power—it’s where skin temperature sensing, heart rate tracking, battery charging & more happen.	1
949	App3	Facebook	2020-08-28	A L L N E W #FitbitVersa3 - and these upgrades are key: built-in GPS ✔️ Active Zone Minutes ✔️ fast charging ✔️ sleeker design ✔️ Did our best-selling smartwatch just get even better? Heck yes.	1
950	App3	Facebook	2020-08-27	A L L N E W #FitbitInspire2 - Let this simple heart rate tracker inspire you to make a healthy change. With a free year of personal guidance from Premium for new Fitbit Premium users, it’s the perfect move toward a healthier you.	1
951	App3	Facebook	2020-08-26	#FitbitSense tracks your body's response to stress, your skin temperature trends and tells you when your heart rate seems above or below your threshold. If only it could give you a back rub, too (next update maybe?).	1
952	App3	Facebook	2020-08-25	A L L N E W L I N E U P out today & each one packs a punch 👊 Here’s the rundown: #FitbitSense: an advanced health smartwatch that helps you manage stress #FitbitVersa3: a stylish smartwatch with built-in GPS #FitbitInspire2: a slim tracker that inspires you to move	1
953	App3	Facebook	2020-08-23	Your wellness depends on more than just your work out! Develop every aspect of your fitness with Fitbit Premium. Get your membership today.	1
954	App3	Facebook	2020-08-20	Wishing you and your family a very happy and healthy Hijri New Year 🌙	1
955	App3	Facebook	2020-08-18	Today is #NeverGiveUp Day! Whether it's a tough workout or a real life situation, it is all about motivating and inspiring ourselves and others to get through all the difficult challenges!	1
956	App3	Facebook	2020-08-17	Get Fit Bingo game in Fitbit Premium is just like regular Bingo, except there’s no sitting, no cards but instead a lot more activity! Get started with a free 90-day trial of Fitbit Premium.	1
957	App3	Facebook	2020-08-13	💪Pump up💪 your Active Zone Minutes on the Fitbit Charge 4 with a weekend workout! It will keep you fresh and energized for the challenges of the coming week! @nilufar_yuldash	1
958	App3	Facebook	2020-08-07	Cheers to avoiding the afternoon slump! What healthy snack helps you power through the day? #FitbitBite	1
959	App3	Facebook	2020-08-05	Who else does that first thing in the morning! Track your sleep and get daily insights with #FitbitVersa2	1
960	App3	Facebook	2020-08-03	Stretching > Stressing. Make sure to get up, stretch your body and get moving…bonus point for doing some guided breathing exercises. #MotivationMonday	1
961	App3	Facebook	2020-08-01	Reach your goals at your own pace! Just a friendly reminder, it’s okay not to rush things, take your time!	1
962	App3	Facebook	2020-08-25	A L L N E W L I N E U P out today & each one packs a punch 👊 Here’s the rundown: #FitbitSense: an advanced health smartwatch that helps you manage stress #FitbitVersa3: a stylish smartwatch with built-in GPS #FitbitInspire2: a slim tracker that inspires you to move	1
963	App3	Facebook	2020-08-23	Your wellness depends on more than just your work out! Develop every aspect of your fitness with Fitbit Premium. Get your membership today.	1
964	App3	Facebook	2020-08-20	Wishing you and your family a very happy and healthy Hijri New Year 🌙	1
965	App3	Facebook	2020-08-18	Today is #NeverGiveUp Day! Whether it's a tough workout or a real life situation, it is all about motivating and inspiring ourselves and others to get through all the difficult challenges!	1
966	App3	Facebook	2020-08-17	Get Fit Bingo game in Fitbit Premium is just like regular Bingo, except there’s no sitting, no cards but instead a lot more activity! Get started with a free 90-day trial of Fitbit Premium.	1
967	App3	Facebook	2020-08-13	💪Pump up💪 your Active Zone Minutes on the Fitbit Charge 4 with a weekend workout! It will keep you fresh and energized for the challenges of the coming week! @nilufar_yuldash	1
968	App3	Facebook	2020-08-07	Cheers to avoiding the afternoon slump! What healthy snack helps you power through the day? #FitbitBite	1
969	App3	Facebook	2020-08-05	Who else does that first thing in the morning! Track your sleep and get daily insights with #FitbitVersa2	1
970	App3	Facebook	2020-08-03	Stretching > Stressing. Make sure to get up, stretch your body and get moving…bonus point for doing some guided breathing exercises. #MotivationMonday	1
971	App3	Facebook	2020-08-01	Reach your goals at your own pace! Just a friendly reminder, it’s okay not to rush things, take your time!	1
972	App3	twitter	2021-01-27	Keep your hands clean and your coffee hot when you use Fitbit Pay with a quick tap anywhere contactless payments are accepted—no phone or wallet necessary	1
973	App3	twitter	2021-01-26	Smart Wake activates a gentle buzz on your wrist during your lightest sleep stage so you can really take flight when it’s time to rise. Goodbye, groggy. Hello, energy. #sleep #sleepbetter #smartwake	1
974	App3	twitter	2021-01-24	To celebrate Compliment Day, we’re making it easy to compliment yourself. Swipe to choose which one feels right for you, then comment your chosen below so we can celebrate you too! #compliment #nationalcomplimentday	1
975	App3	twitter	2021-01-22	The global Fitbit community has a lot to be proud of, including these inspiring Active Zone Minutes. #YearInReview	1
976	App3	twitter	2021-01-22	2020 may not have been a dream year, but that didn’t stop the global Fitbit community from catching their ZZZs. #YearinReview	1
977	App3	twitter	2021-01-21	2020 was a wild ride, and these stats show how the global Fitbit community made the most of it. Now bring that energy into 2021! #YearInReview	1
978	App3	twitter	2021-01-19	Make gains on your hydration goals with @HidrateSpark STEEL, the world’s smartest water bottle. Electric light bulbSee it glow & know when to drink. DropletAutomatically track water intake and sync stats via Bluetooth Mobile phoneFollow progress in the app ⌚Sync with Fitbit tracker or watch	1
979	App3	twitter	2021-01-18	“If you can’t fly then run, if you can’t run then walk, if you can’t walk then crawl, but whatever you do you have to keep moving forward.” -Dr. Martin Luther King, Jr. #MLKDay	1
980	App3	twitter	2021-01-18	Today we celebrate Dr. Martin Luther King, Jr., and we find motivation—for all our goals—in his words. To improve our communities on this day of service, to set an intention for the greater good, to support each other because every body is fit for loveRed heart http://bit.ly/MLKT21	1
981	App3	twitter	2021-01-14	If you’ve got this on your wrist, you’re part of a community 28+ million strong. Tag us @fitbit so we can see and celebrate all your moves.	1
982	App3	twitter	2021-01-11	More variety keeps your workout routine feeling fresh, so stock up on fitness equipment that gets you hyped to sweat #fitness #workout #motivation	1
983	App3	twitter	2021-01-09	Qualities you gained in 2020 that will make 2021 better: https://bit.ly/2LCCs5F #newyearnewgains	1
984	App3	twitter	2021-01-06	Pick a word, any word. Because when you shift your mindset from losing to gaining, your resolutions go from *blah* to *boo YAH* #newyear #newyearnewgains	1
985	App3	twitter	2021-01-05	Accessory game, level 100. #wearamask	1
986	App3	twitter	2021-01-04	Looking to start a new workout routine this #newyear? Fitbit Premium is featured as one of the best workout apps for exercise anywhere: https://bit.ly/3588dL5. Thank you @SELFmagazine !	1
987	App3	twitter	2021-01-01	2021—the year of SparklesYOU Sparkles There’s no better time to focus on all the good you can gain for your health & fitness. More energy. More insights. More feeling stronger each day. It’s about so much more than what you want to lose. How are you getting the most out of the next 365?Party popper	1
988	App3	twitter	2021-01-01	When the smartwatch strikes midnight…HAPPY NEW YEAR! You probably don’t need to set an alarm for this one Partying face #newyears #newyearseve #2021	1
989	App3	twitter	2020-11-29	Baby, it’s cold outside. Just ask Google for the forecast before you take on the flurries. #HeyGoogle	1
990	App3	twitter	2020-12-28	5 Stretches to Help Counteract the Effects of Sitting: https://bit.ly/34PQiZk	1
991	App3	twitter	2020-12-25	Your world may look different from years past, but here’s to spreading joy near and far. And to gifting yourself a solid sweat when the food coma wears off. #Christmas	1
992	App3	twitter	2020-12-24	Raise the roof with those you love, even if you’re not under the same one. Merry music on your wrist makes it happen Multiple musical notesWhat songs keep your family rocking through the holidays?	1
993	App3	twitter	2020-12-23	A little twinkle here, a bold red there. Hello, festive accessories.	1
994	App3	twitter	2020-12-21	The longest night of the year is upon us Alarm clockso tuck in and take off to dreamland to make the most of it. What’s your highest ever Sleep Score? #wintersolstice	1
995	App3	twitter	2020-12-18	The most valuable gifts come with a Premium trial for new Premium users. Wrap up six months of deeper insights and guided programs with a Sense smartwatch, and a whole year with an Inspire 2 tracker. Tag someone who would appreciate this package deal Winking face	1
996	App3	twitter	2020-12-17	Learn about Fitbit Premium + Health Coaching in this review by @ZDNet if you’re looking for some extra motivation and accountability this season:	1
997	App3	twitter	2020-12-16	These healthy holiday cocktail recipes deliver all the flavors of the season—and they’re packed with nutritious ingredients to boot: https://bit.ly/3gM2yi4	1
998	App3	twitter	2020-12-15	Answer calls right on your wrist without fishing your phone out of your pocket. Can’t stop this holiday hustle Collision symbol	1
999	App3	twitter	2020-12-14	Talk to Google to watch your holiday season shine—try saying “turn on the lights” Star-struck Connect your smart home devices in the Google Assistant app on your phone to see for yourself. #HeyGoogle #holidays	1
1000	App3	twitter	2020-12-11	Get your hands on a soft, sophisticated, premium Horween® leather band—this one really pops.	1
1001	App3	twitter	2020-12-10	Inspire 2 battery lasts all 8 nights and then some Menorah with nine branches	1
1002	App3	twitter	2020-12-09	This belly-warming porridge is perfect for chilly mornings, and provides immunity-strengthening properties that’ll protect your #health through the flu season: https://bit.ly/37NrBxs #healthyfood #immunestrengthening	1
1003	App3	twitter	2020-12-08	Our Holiday #GiftGuide Has Ideas For Everyone on Your List	1
1004	App3	twitter	2020-12-07	Ready to make staying hydrated fun? Check out the newly Fitbit-branded smart water bottle with HidrateSpark	1
1005	App3	twitter	2020-12-03	Under the wrapping paper, left on the mantel, let’s face it—your phone could be anywhere. Use the built-in Find My Phone app on your smartwatch to hear it ring from the least expected places within your holiday headquarters	1
1006	App3	twitter	2020-12-01	Saying yes to managing stress is literally in the palm of your hands with tools on Fitbit Sense. Feeling empowered yet?	1
1007	App3	twitter	2020-11-30	It’s #CyberMonday, your last chance to clean up at our year’s biggest sale—without ever having to put on pantsJeans	1
1008	App3	twitter	2020-11-26	Yaaay, it’s #BlackFriday—our biggest sale of the year! Finally grab that tracker, watch or Premium membership you’ve been eyeing—or crush all your holiday shopping now and feel as satisfied as a kid cleaning out the candy store.	1
1009	App3	twitter		There’s a lot to be grateful for this #Thanksgiving. For a quick mood boost, try out our Insta story gratitude journal today—and while you’re at it, tag someone you’re feeling thankful for! Orange heart	1
1010	App3	twitter	2020-11-25	Bring good tidings and inspire better health for someone you love this yearWrapped present From sleep to stress, Fitbit has you covered. #GiveWhatMatters	1
1011	App3	twitter	2020-11-23	With this latest OS update, our newest smartwatches are just getting smarterCollision symbol	1
1012	App3	twitter	2020-11-19	Inspired by nature and sun soaked warmth, #Versa3 in Pink Clay is a timeless neutral shade that complements all skin tones. Attracts compliments, too.	1
1013	App3	twitter	2020-11-17	WTH is EDA Scan? This innovative app on #FitbitSense measures your EDA responses to help you understand your body’s response to stressors, so you can learn to manage #stress better.	1
1014	App3	twitter	2020-11-17	It’s high time...for you know what. Which seasonal fruit or veggie is starring in your pie dreams this #Thanksgiving? Red applePearRoasted sweet potatoPie	1
1015	App3	twitter	2020-11-13	If you’d like to stay off the couch and out of the doctor’s office, try whipping up these immune-enhancing drinks	1
1016	App3	twitter	2020-11-12	Moving’s important, but so is snoozing: Deep #sleep promotes key muscle growth & repair. Is it a stretch to say last night’s snooze that left a puddle of drool on your pillow was a workout? We think not Winking face with tongue	1
1017	App3	twitter	2020-11-11	Learn how to moonwalk with #Inspire2 in Lunar White on your wrist.	1
1018	App3	twitter	2020-11-10	Now Live on #FitInFocus: Celebrity trainer, nutritionist and Fitbit ambassador, @harleypasternak , speaks about his tried and true fitness and nutrition tips and how to stay informed on the latest science.	1
1019	App3	twitter	2020-11-09	Your ideal #morningroutine: a) be jolted awake by a blaring alarm b) drift into wakefulness during a lighter stage of sleep We’ll take column B. Smart Wake is life changing—try it on #Charge4.	1
1020	App3	twitter	2020-11-05	Did you know one of the best ways to make yourself feel better is by helping someone else? Listen. Help a friend. Do a random good deed. Double tap if you’re down to practice some compassion today. Growing heart	1
1021	App3	twitter	2020-11-03	This is it, 2020: Your day to speak up, stand tall and let your voice be heard. Raising hands to everyone who made their #vote count today. #election2020	1
1022	App3	twitter	2020-11-01	#DaylightSavings alert! Getting that extra hour back is a gift—and a chance to reset your intentions. What will you do with it?	1
1023	App3	twitter	2020-10-31	When life throws you a trick, focus on your treats. We’re thankful for candy piles, costumed smiles and colorful pumpkins that brighten the whole neighborhood Jack-o-lantern #HappyHalloween	1
1024	App3	twitter		Feel your #stress melt away with guided breathing sessions on #FitbitSense. It’s like having a portable Zen garden you can take with you anywhere.	1
1025	App3	twitter	2020-10-30	Feel your #stress melt away with guided breathing sessions on #FitbitSense. It’s like having a portable Zen garden you can take with you anywhere.	1
1026	App3	twitter	2020-10-28	Sweat looks even better in the new #Versa3 sapphire sport band. How are you getting your heart pumping outside before winter rolls in?	1
1027	App3	twitter	2020-10-24	Check out our co-founder and CEO @ParkJames in conversation with @WSJ , discussing Fitbit's evolution from fitness tracking to becoming an essential health and wellness tool for millions around the world:	1
1028	App3	twitter	2020-10-22	Active Zone Minutes goes beyond 10,000 steps to track all your activity. Learn how this feature gets to the heart of your fitness: https://bit.ly/3oj7WN6 And join our #GetInYourZone challenge next week to see if you can get the recommended 150 Active Zone Minutes in a week.	1
1029	App3	twitter	2020-10-22	Here’s a simple formula that can help you put together a delicious, nutritious plant-based meal in less time than it takes to boil water:	1
1030	App3	twitter	2020-10-21	Pop a tent in the backyard for camping family fun that’s even easier than the real thing (cleaner bathrooms, for starters ) and top off the night with homemade s’mores. Try it out and give us your recap in the comments!	1
1031	App3	twitter	2020-10-20	The latest findings from our research team show how people around the world have adapted to global pandemic-induced lockdowns	1
1032	App3	twitter	2020-10-17	Want a great #brunch option without the hours of prep that can go into a full brunch spread? This turkey breakfast burger recipe is the ticket. Who's ready to try this out?	1
1033	App3	twitter	2020-10-16	Sp oh… what? Get to know SpO2 on #FitbitSense: *What it is* the level of oxygen in your blood *Why u should care* This little number can indicate important changes in your fitness & wellness. Just download the free clock face to see your nightly SpO2 level right on your wrist.	1
1034	App3	twitter	2020-10-15	Is your #sleep a mystery? Make that history. #Versa3 uses heart rate to detect how much time you spend in light, deep and REM sleep so you can understand where your snoozing could use improving.	1
1035	App3	twitter	2020-10-13	Step up & #vote Cheering megaphone Whether you walk to the polls or mail in your ballot, make a plan and make your move this November by casting your vote in the #2020election.	1
1036	App3	twitter	2020-10-12	Your most important job on Nov. 3? VOTE. Or mail your ballot/leave it at a drop-off point early. And big shout out to our CEO @ParkJames for signing Time to Vote’s CEO pledge & ensuring Fitbit employees have time to vote	1
1037	App3	twitter	2020-10-10	A little PSA on #WorldMentalHealthDay: If you’re feeling overwhelmed by stress, 1) you’re not alone 2) Fitbit has tools to help. Try the EDA Scan app on #FitbitSense to understand your stress levels and learn to manage them better over time.	1
1038	App3	twitter	2020-10-09	There are a number of different foods you can incorporate into your diet that have a naturally calming effect. Let’s take a look at five naturally calming foods to add to your plate:	1
1039	App3	twitter	2020-10-09	Learn how creating a smarter to-do list, embracing a sense of routine, intentional self-care, and more can help you reduce stress:	1
1040	App3	twitter	2020-10-09	While there are multiple types of meditation, one seems to have clear physical and mental benefits: post-workout meditation	1
1041	App3	twitter	2020-10-08	The Stress Management Score on the new #FitbitSense can give users insights into how their body is managing stress:	1
1042	App3	twitter	2020-10-08	We interrupt this program for an LOL break: Find your fitness alter ego by using the name of your first pet + the last workout you did. Fitbit’s VP of Design @JonahABecker is also known as Pierre Planks! Share yoursDown pointing backhand index	1
1043	App3	twitter	2020-10-07	Get heart smart: #FitbitSense has a compatible ECG app that lets you assess your heart for atrial fibrillation on demand. *** Fitbit ECG app only available in select countries; not intended for use by people under 22 years old. See https://bit.ly/3nBZ5Ga for more details.	1
1044	App3	twitter	2020-10-07	It's more important than ever to find healthy ways to manage the stress, anxiety, and worry of modern life, especially when that worry feels constant. Here are some new and unique ways to manage your stress: How to Find Your Calm in Chaos	1
1045	App3	twitter	2020-10-06	The Fitbit research team set out to explore if wearables can measure physical stress responses in order to give users a better understanding of how they can monitor and manage stress in their lives. Here's what they found: Tuned In, Stressed Out	1
1046	App3	twitter	2020-10-06	On #WorldTeacherDay our hearts are full of thanks for all the teachers adapting to new norms and working overtime. And to the parents who never planned to add “homeschooling” to their resumes—you amaze us by taking it all in stride.	1
1047	App3	twitter	2020-10-03	#FitbitSense in Carbon was inspired by earth’s natural elements. With a polished stainless steel ring and laser-bonded Corning® Gorilla® Glass 3 display, our newest smartwatch is exceptional by design.	1
1048	App3	twitter	2020-09-30	Still haven’t bookmarked our new podcast Fit in Focus? Dooo it. In Episode 3 “Exploring the mysteries of sleep,” sleep behavior specialist Dr. Grandner talks about weird dreams and how sheltering in place may be impacting your ZZZs. #InternationalPodcastDay	1
1049	App3	twitter	2020-09-29	The art of merging design and technology: In this week's episode, Jonah Becker, SVP of Design, shares how his team of industrial designers has created a style that makes Fitbit’s advanced products feel super user-friendly.	1
1050	App3	twitter	2020-09-28	With just a little oil, salt, pepper and heat, vegetables become delectable CarrotEggplantRoasted sweet potato Get your fill of the grill before summer’s officially out the door.	1
1051	App3	twitter	2020-09-24	Check out the inspiring story of Fitbit user Erin L. who transformed her life for good via @POPSUGARFitness .	1
1052	App3	twitter	2020-09-23	Iconic, innovative and made with REPREVE® recycled plastic fibers, new Pendleton for Fitbit accessories are good for the planet and good for your goals. @PendletonWM	1
1053	App3	twitter	2020-09-22	Bring a sense of adventure to every day with nature-inspired accessories featuring iconic @PendletonWM patterns you can wear with Fitbit Sense or Versa 3.	1
1054	App3	twitter	2020-09-21	Bring a sense of adventure to every day with nature-inspired accessories featuring iconic @PendletonWM patterns you can wear with Fitbit Sense or Versa 3.	1
1055	App3	twitter	2020-09-18	Stand out while going all in on your goals with new Victor Glemaud + Fitbit—a bold collection of knit accessories fit for any personality. @glemaud	1
1056	App3	twitter	2020-09-16	Add some extra style to your Fitbit Sense or Versa 3 with these all-new bold, beautiful knit accessories created by award-winning designer Victor Glemaud.	1
1057	App3	twitter	2020-09-16	Can your Fitbit help in the fight against COVID-19? In this week’s episode, we talk with Dr. Conor Heneghan, Director of Research Algorithms at Fitbit, about Fitbit's COVID-19 study aiming to build an algorithm that detects COVID-19 before symptoms start: Can your Fitbit device help in the fight against COVID-19? - Fitbit	1
1058	App3	twitter	2020-09-16	Calling all Fitbit users! Have you lost half your body weight (or more)? If so, we want to hear from you! Submit your story	1
1059	App3	twitter	2020-09-15	Introducing new Victor Glemaud + Fitbit—sustainable designer accessories that combine REPREVE® recycled plastic fibers to create bold pieces that celebrate individuality. @glemaud	1
1060	App3	twitter	2020-09-15	We're excited to share our Future of Fit immersive launch experience and all of our amazing new products.Clapping hands sign	1
1061	App3	twitter	2020-09-15	Can you track your SpO2Red question mark ornamentO YESRed exclamation mark symbolThis free SpO2 Signature clock face for smartwatches shows your nightly oxygen levels at a glance so you can see potential changes in your wellness	1
1062	App3	twitter	2020-09-14	Fitbit’s compatible ECG app receives clearance in US and EU with availability in October* *The Fitbit ECG app is only available in select countries; not intended for use by people under 22 yrs old. See https://bit.ly/33vdkmD for additional details.	1
1063	App3	twitter	2020-09-09	Fitness comes down to getting that heart pumping. It’s why #Versa3 has Active Zone Minutes and buzzes when you hit your fat burn, cardio or peak zones. More effort earns you 2x the mins. Wonder if you’re hitting the recommended 150 mins a week? There’s only one way to find out Splashing sweat symbol	1
1064	App3	twitter	2020-09-09	“I have lost 4 pounds in 5 weeks. I feel back on track and have more energy and a better mood.” - Bonnie L. 65 See what you can achieve with an expert Health Coach from Fitbit!	1
1065	App3	twitter	2020-09-08	Lose track of your charger. Keep tracking your effort. New #Inspire2 has a 10-day battery so it keeps up all week & then some.	1
1066	App3	twitter	2020-09-07	Soon your Fitbit smartwatch will measure SpO2—or the level of oxygen in your blood—to help you learn when there may be an indication of important changes in your fitness and wellness.	1
1067	App3	twitter	2020-09-07	No phone, who dis? Oh, it’s you, taking your exercise up a notch now that #FitbitVersa3 has built-in GPS.	1
1068	App3	twitter	2020-09-04	We’re excited to announce that we have developed a new Health Metrics dashboard, available soon to Premium members. Discover key health metrics, including skin temperature variation, breathing rate, resting heart rate, SpO2, and heart rate variability.	1
1069	App3	twitter	2020-09-03	Give your goals the green light. With a new multi-path sensor and PurePulse 2.0 algorithm, #FitbitVersa3 is locked and loaded with our most advanced heart rate technology.	1
1070	App3	twitter	2020-09-02	90 pounds down and sober, learn how Fitbit user Erin L. took control of her health on @TODAYshow :	1
1071	App3	twitter	2020-08-31	Want help managing your stress? Hi, same. That’s why we made #FitbitSense with an EDA Scan app that gauges your body’s stress response and gives you tools to manage it. Sense includes a free 6-month Premium membership for even more ways to help you relax (new Premium users only).	1
1072	App3	twitter	2020-08-28	Stress affects us all, but why exactly do we feel it and what causes it? Fitbit research scientist Dr. Samy Abdel-Ghaffar breaks down how we appraise a stressful situation, and how stress can impact your health on the latest episode of #FitInFocusCheering megaphone	1
1073	App3	twitter	2020-08-28	Camo. Rainbow. Coral. Charcoal. All made with REPREVE® recycled fibers. These new accessories for Sense & Versa 3 look good on and are good for the planet. Which one makes you do a double take?	1
1074	App3	twitter	2020-08-26	White heavy check mark Pace White heavy check mark Distance White heavy check mark Heart Rate Cross mark Phone Leave your phone and still see your stats with built-in GPS on the new #Versa3.	1
1075	App3	twitter	2020-08-25	Innovation that knows you: Meet #FitbitSense - our first health smartwatch that helps you manage your stress, monitor your heart health, track your skin temperature & more.	1
1076	App3	twitter	2020-08-20	Have you lost 100lbs or more using your Fitbit device? We want to hear from you! Tell us about your weight loss journey	1
1077	App3	twitter	2020-08-20	After feeling like she was missing out on life, Lindy decided it was time to change. Read how Lindy uses a Fitbit to stay on top of her health via	1
1078	App3	twitter	2020-08-20	Since the start of this global health crisis, the Fitbit research team has been diligently working to help make a difference in the fight against COVID-19. This includes accelerating work on early disease detection	1
1079	App3	twitter	2020-08-19	Sustainable style: this comfortable woven band made with @REPREVE ® recycled fibers.	1
1080	App3	twitter	2020-08-14	See where you went and how hard you worked to get there. Get built-in GPS on #Charge4 with workout intensity maps waiting for you in the app.	1
1081	App3	twitter	2020-08-14	Find out how a few minutes of mindfulness per day can impact our health and wellness:	1
1082	App3	twitter	2020-08-12	Now up on the #FitInFocus podcast: Inside the Fitbit Human Research Lab with Tracy Geist	1
1083	App3	twitter	2020-08-11	Pop quiz—what have you planted during quarantine? An entire jungle at home 16.3% Yourself, on the couch 51.4% Positive vibes and hope! 32.4%	1
1084	App3	twitter	2020-08-10	Want to share your fitness or weight loss journey? We’re looking to celebrate Fitbit users who lost 100lbs or more. If that’s you, or someone you know, reach out to us here	1
1085	App3	twitter	2020-08-08	If you’re not jamming to your @Deezer Flow mix from your smartwatch, are you even jamming?	1
1086	App6	Facebook	2021-01-31	Don't skip your dinner and let yourself get hangry! If you lack the motivation, try a Vegetable and Prawn Stir-fry that is packed with nutrition, flavour and done in a flash. ✅ 🕘 When regularly skipping meals and going into a large energy deficit, our metabolism slows down to conserve and regulate how many calories are burned without compromising our current state. Plus, it can make it difficult …	1
1087	App6	Facebook	2021-01-28	4 delicious and easy #plantbased meals that prove a colourful diet is a healthy diet!	1
1088	App6	Facebook	2021-01-24	When it's a hot day, simple salads are the way to go. This FS member tossed together spinach, cucumber, tomato, pomegranate and marinated feta with a light aioli dressing for a refreshing meal. 💡 To bulk up this bowl: • for a protein kick, add shredded chicken or chickpeas. • for carb power, add quinoa or roasted sweet potato.	1
1089	App6	Facebook	2021-01-21	2020 is over and it was a pretty successful year in terms of acceptance 🙈. There is 30kg between the photos. I've let it go for the last few weeks and I'm fine, it was a good thing. Now I will attack again. My first goal is 14kg and I can do that. I will also create 💪. I won't put pressure nor a time frame on myself. It comes when it comes 😎.' This weeks motivation coming from the inspiring @love…	1
1090	App6	Facebook	2021-01-20	Rather than eliminating snack time, use it as an opportunity to get in even more healthy carbs, fats, protein and antioxidants ✅ Fill your plate with a nutritious combination of flavours and texture for energising and sustaining power throughout your day. 🍃 apple 🍃 mandarin 🍃 grapes 🍃 nut mix 🍃 banana What's your go-to healthy and filling snack combination? ✊🏼	1
1091	App6	Facebook	2021-01-15	4-ingredient Zucchini and Parmesan Fritters 😍 An easy and quick recipe that helps you get in the good stuff the delicious way.	1
1092	App6	Facebook	2021-01-13	Croutons in salads: ✅ or ❌? We see a lot that croutons are a big no-no in salads with 'minimal nutrition and unnecessary carbs'. If this doesn't affect your feelings about eating salad, then that's okay. More power to you! But sometimes if homemade, wholewheat, baked croutons help get down the greens in an enjoyable way for only a small amount of extra calories, why ban them? Whole-wheat bread ad…	1
1093	App6	Facebook	2021-01-12	Easy Keto Spinach Pie 😋 It's creamy, cheesy and perfect for a low carb meal. Yum! Recipe👇🏼 4 eggs 50 g cooked ham 30 g grated cheese 200 g light cream cheese 300 g chopped raw spinach 1. Place the ham in a non-stick tart pan. 2. Beat eggs with the cream cheese and grated cheese, then add the spinach. Season to taste. 3. Pour the mixture over the ham and bake at 180° for 20 minutes until cooked.	1
1094	App6	Facebook	2021-01-04	This homemade vegetarian stuffed pepper is a nutritious, satisfying dish with a low-fat twist! Instead of high fat and salty cheese fillings, opt for silken tofu in your mixture. ✅ Trust us! It's a simple way to add low-fat protein that's smooth, creamy and will make your delicious flavours shine.	1
1095	App6	Facebook	2020-12-28	Having a batch of healthy granola is great for quick access to enjoy a satisfying, easy breakfast any time of the week! 269 kcals ∙ by FS member 👇🏽 100 ml unsweetened almond milk 1 apple 20 g pistachio granola 1 tbsp peanut butter	1
1096	App6	Facebook	2020-12-27	A simple plate of scrambled eggs with sauteed mushrooms & zucchini for a healthy Sunday morning ☀️	1
1097	App6	Facebook	2020-12-24	Easy ways to cruise through the holiday season and end the year feeling strong, healthy, and ready to start the next. Wishing everyone a happy and safe Christmas! 🎅🤶🎄	1
1098	App6	Facebook	2020-12-20	Another colourful bowl proving homemade always beats takeout 😍 Save money and unwanted ingredients. Stay healthy and energised. Plus, you'll probably have leftovers for days! 🍽️ This tasty bowl has quinoa for the base, homemade falafel for protein, red cabbage, carrots, beetroot, red bell pepper, green beans with a lime and avocado dressing.	1
1099	App6	Facebook	2020-12-17	Loading fresh and flavourful ingredients into a wrap always makes for a yummy lunch or an easy dinner. Plus, when it takes less than 20 minutes to prep and is a fun way to eat salad, you know it's a winner.	1
1100	App6	Facebook	2020-12-15	Simple scrambled eggs with olive oil bread and crushed tomatoes for breakfast 😋 461 delicious and nutritious calories👇🏽 4 g butter 8 g olive oil 2 large eggs 78 g tomatoes 60 g olive oil bread 5 g parmesan cheese	1
1101	App6	Facebook	2020-12-14	An affordable and delicious combination of squid, roasted pumpkin, cherry tomatoes and greens made by @healthywithmory 😍	1
1102	App6	Facebook	2020-12-07	#DinnerInspo: Homemade pizza with a cauliflower base 😋 A tasty, healthy and low-carb alternative perfect to enjoy on a keto diet.	1
1103	App6	Facebook	2020-12-06	Meal prep doesn't have to be dramatic and complicated. Stick to basic recipes you love, don't prepare more than three days worth, unless you plan on freezing (who wants 4-day old soggy broccoli?), and remember why you're doing this in the first place. Then the only thing that will be dramatic is the improvement you make ✅	1
1104	App6	Facebook	2020-12-03	When your morning starts with a filling and nutritious breakfast, it makes the rest of your day 99.99% better. Tried and tested (billions of times). A few reasons to eat up in the morning👇 Breakfast lifts your mood. Breakfast helps reach fibre and vitamin goals. Breakfast boosts energy and brain performance. Breakfast helps make smarter eating choices later on. The benefits and recipes are countl…	1
1105	App6	Facebook	2020-11-30	A healthy, delicious and easy combination for a satisfying and filling meal ✅ Wholegrain bread Turkey breast Swiss cheese Boiled egg Avocado Seeds Yum!	1
1106	App6	Facebook	2020-11-29	Tumeric Ginger Chicken Rice 😋 A member's mighty tasty, one-pan dish that makes for a wonderful quick dinner or meal prep idea! 👇🏽 Serves 6 / 474 kcals per portion 650g chicken breast 400g canned corn 250g brown rice 3 cups of broccolini 1 capsicum 2 onions 2 tsp turmeric 1 tsp ginger 1 tsp yellow mustard 1 juice of a lemon 2 tbsps honey 4 cloves garlic	1
1107	App6	Facebook	2020-11-27	#DinnerInspo: Caesar salad with grilled shrimp. A light, quick, gluten-free dinner that's perfect for those busy nights (or any time really 😉).	1
1108	App6	Facebook	2020-11-25	Health benefits of homemade chicken noodle soup 😋 🥕 Carrots, celery and onion are packed with beta-carotene, vitamin A and C, as well as antioxidants and minerals. This keeps eyes healthy, boosts immunity, improves digestion and eliminates toxins from the body. 🍜 Wholewheat noodles can aid with weight control by helping you feel full quicker and leave you satisfied for longer. 💪🏽 Lean chicken is …	1
1109	App6	Facebook	2020-11-20	Chicken breast, vegetables and rice. Super easy, healthy and way tastier than the popular meal-prep combo. It can also be conveniently made in less than 30 minutes ✅ How to make: 150 g boneless chicken breast 1 tbsp oyster sauce 1 tbsp honey 1 tbsp soy sauce 1 tbsp fish sauce 1/2 tsp chilli powder 1 tbsp oil 1 tbsp water Combine the ingredients in a bowl and then place in the chicken. Let in mari…	1
1110	App6	Facebook	2020-11-18	If you've got the time, this heavenly salmon ravioli with garlic pesto is well worth the effort to make for dinner this week. For around 450 kcals, it will comfort your soul and nourish your body too. 🍽️ by FS member.	1
1111	App6	Facebook	2020-11-17	A delicious, satisfying and nutritious quiche with an easy wholewheat tortilla crust ✅ For a snack size, use mini tortillas in a muffin tray. With a wide variety of easy, flavourful filling combinations, they are perfect for breakfast, lunch or dinner!	1
1112	App6	Facebook	2020-11-13	✨ BAKED BLUEBERRY OATS 😋 For those who can't stand sloppy porridge, this dish will no doubt get your tick of approval. It's simple, scrumptious, nutritious and perfect for sharing or leftovers ✅ Serves 6 | 158 kcals per portion Ingredients: 120 g oats 100 g almond flour 150 g blueberries 50 g erythritol (or any sweetener you like) 185 g plain yoghurt 1 egg 2 tsp cinnamon 1 tsp nutmeg 1 tsp vanill…	1
1113	App6	Facebook	2020-11-11	Mediterranean Couscous with a Mediterranean view! 😍 Couscous is light, fluffy, quick to cook, and soaks up all the delicious flavours of your meal. Tossed with fresh vegetables, feta cheese, olives, herbs and lemon dressing, it's a nutritious way to add delicious variety to your week!	1
1114	App6	Facebook	2020-11-09	When meal prep is as healthy and delicious as this, it's worth spending a little time to help you stay on track ✅ 🍽️ Baked salmon, kale, turmeric cauliflower, psyllium & almond meal flatbread. Plus, chickpea dukkah crackers for snacks.	1
1115	App6	Facebook	2020-11-05	💡 Instead of completely denying foods typically labelled as forbidden in restrictive diets, occasionally allowing yourself a treat is a simple rule to give yourself power over your favourite food cravings. This way you can shut the voice in your head begging for those foods, demystify what isn't 'allowed', lower risk of overeating, and turn healthy eating into a lifelong habit ✅ Enjoy your treat …	1
1116	App6	Facebook	2020-11-04	Bacon and eggs are a delicious staple breakfast on a keto diet. For a nutrient boost on your plate, add extra low-starch vegetables such as avocado, spinach, zucchini, or mushrooms. It's an enjoyable way to increase fibre, heart-healthy fats, and essential nutrients often deficit in low-carb diets ✅ 🍽️ by FS member 2 eggs 100g low-fat cottage cheese 4 pieces of bacon 30g avocado + tomato + cucumb…	1
1117	App6	Facebook	2020-11-02	💥 March to October 2020 💥 Monday Motivation coming from the go-getter Jeongseok with his 7-month transformation! Jeongseok proves that with consistency and time, results will happen. His advice is to 'eat the food you want to eat, just manage your calories!' - a key step to make educated decisions for a healthy eating lifestyle. Thanks for sharing with us and being a part of the FatSecret communi…	1
1118	App6	Facebook	2020-10-29	Lend a helping hand! 🖐️ Our team is working hard at providing the best possible experience for all our members. To do that, we must listen and understand the needs of our large and diverse global community. We’re looking to gather feedback on the food logging experience of the app. If you’d like to make an impact, please reach out by completing this survey: https://forms.gle/bHEgdjbzKQMGERgh7. It…	1
1119	App6	Facebook	2020-10-29	✨ Benefits that will motivate you to eat a salad (almost) every day! • High fibre stabilises blood sugars and helps prevent mood swings. • Boosts digestion and reduces bloating as gut bacteria is fed with fuel needed to break down absorbable nutrients. • Helps improve our relationship with food by rethinking it as fuel and nourishment for the body to function. • Eating low-calorie salad before th…	1
1120	App6	Facebook	2020-10-22	A delicious morning bowl of oatmeal & fresh berries is a dish you'll want to get out of bed for 😍 • High in fibre and antioxidants • Helps lower cholesterol and blood sugar levels • Promotes healthy gut bacteria • Increases satiety With a wide variety of fun, convenient and nourishing oatmeal recipes (and also tips on how not to ruin it) that everyone can love, we can't find any reasons not to ma…	1
1121	App6	Facebook	2020-10-20	It's no secret corn thins are a go-to option when snack time hits 😋 Although low in calories, their simple carbohydrates make it a high glycemic food ❌ This provides a short burst of energy by raising blood sugar levels but can leave you just as hungry soon after - the perfect mix for overeating. ✅ To stop those stomach rumbles and enjoy a more filling snack, pair it with lower glycemic foods tha…	1
1122	App6	Facebook	2020-10-16	A healthy, feel-good meal that tastes great and can be cooked in 30 minutes or less ✅ 🍽 Shrimp pasta with feta, sun-dried tomatoes, capers, garlic, basil, oregano and pepper. And, of course, a side salad 😜	1
1123	App6	Facebook	2020-10-15	Banana Oat Pancakes ✨ A tasty alternative to traditional pancakes that provides a nutritious boost of protein, fibre, potassium, and plenty of essential vitamins and minerals. Making them a perfect midweek healthy treat for 395 kcals! For pancakes, blend or mash: 15g oats 1 banana 1 large egg 1 tsp cinnamon 5g psyllium husks Top with: 100g natural yoghurt 128g frozen mixed berries	1
1124	App6	Facebook	2020-10-14	🛠 Scheduled maintenance 🛠 We will be taking our systems offline to complete scheduled maintenance. Most of our services will be unavailable from these times: Melbourne: 21 Oct (10:30am) London: 21 Oct (12:30am) Moscow: 21 Oct (2:30am) New York: 20 Oct (7:30pm) Rio de Janeiro: 20 Oct (8:30pm) Los Angeles: 20 Oct (4:30pm) Seoul: 21 Oct (9:30am) An update will be posted once services are restored.	1
1125	App6	Facebook	2020-10-13	Simple yet delicious flavours for a light, gluten-free and low carb meal✅ Avocado Mozerella Mixed Greens Baked chicken Pickled Jalapenos	1
1126	App6	Facebook	2020-10-10	⭐ Tip for buying the healthiest muesli for you! - Don't be influenced by the health claims on the box. Check and compare the 'Per 100g' column on the nutrition panel to other brands available. - Aim for 5g or less per 100g sugar for low sugar option, or 10g or less per 100g sugar for options with dried fruit. - Fewer ingredients, the better. Look out for unwanted vegetable oils, flours, hidden su…	1
1127	App6	Facebook	2020-10-08	A hearty & nourishing bowl of plant-based power 💪🏼 💡All proteins (plant and animal) are a long chain of amino acids - the building blocks of life. For humans, 9 out of 20 are considered essential as your body can't make them so they must come from your diet. Animal protein is considered 'complete' containing all 9 essential amino acids, whereas plant-based protein is 'incomplete' or missing amino…	1
1128	App6	Facebook	2020-10-06	Omelettes - the ultimate healthy and quick meal that can be enjoyed all year round 😋 With only 65 calories in 1 medium egg, they are a powerhouse for nourishment. Protein, essential fatty acids, folic acid and iron, as well as vitamin A, D, and E ✅ Interestingly, these are mostly all found in the yolk so don’t throw the nutrients away! Plus they a cheap, versatile and tasty way to increase satiet…	1
1129	App6	Facebook	2020-10-03	Switch up your chip’s dipping sauce for delicious zesty guacamole! Though many condiments are fine in moderation, we tend to have quadruple the recommended serving size 😅 ❌ It’s likely your favourites contain sneaky culprits sabotaging your healthy meals like high amounts of artificial additives, added salt and sugar per tablespoon. 🥑 Guacamole not only enhances your meal but is packed with impre…	1
1130	App6	Facebook	2020-10-01	Healthy meal ideas for a 1400-calorie day that will leave you satisfied and energised! 👇 Breakfast: flatbread with egg, cheese, avocado, capsicum, cherry tomatoes and coriander - 389 kcals. Lunch: beef steak, pasta, cherry tomatoes, broccoli - 573 kcals. Snack: yeast-free bread, chicken cutlet, cucumber, arugula - 247 kcals. Dinner: omelet with zucchini and herbs - 209 kcals. 💡Remember, each pers…	1
1131	App6	Facebook	2020-09-29	May 2020 - August 2020 ✨ Three months and 9kg difference. This is the amazing @polly__wants who has recently achieved 203 days of PUSH-UPS! What's her secret? She says there is none. It's simply committing to running, intermittent fasting, exercises, and diet. Here's what she had to say 👇 'This is my program. This is my rule. This is my joy. Even if my goals are different now. These are my Fantas…	1
1132	App6	Facebook	2020-09-24	#DinnerInspo: Vegetable masala burger with a big bowl of fresh veggies and greens 🥗 A basic, but not boring, way to increase more quality, nutritious whole foods into your diet and benefit from a satiated stomach with low-calorie density foods.	1
1133	App6	Facebook	2020-09-23	🚨 Pasta is GOOD and can successfully be part of a healthy diet (in moderation, like most things 😉). Plus, there are around 350 varieties of pasta so it's important to test them all, right? Why do we love it? One cup of cooked pasta has approx. 220 kcals, 1.3g of fat, low sodium and no cholesterol. It is affordable, low GI, and provides essential glucose for your brain and muscles ✅ Partnered with…	1
1134	App6	Facebook	2020-09-18	There's so much goodness to love about these shrimp tacos! A refreshing, flavourful, nutritious alternative to get that healthy taco fix and can easily be put together in less than 30 minutes. Here’s the calorie breakdown: 🍤 shrimp = 100 kcals 🌮 2 tortillas = 200 kcals 🥒 1 mini cucumber = 10 kcals 🖤 3 tbsp beans = 25 kcals 🍅 1 small tomato = 16 kcals 🌽 3 tbsp corn = 22 kcals 🔥 sriracha and chipot…	1
1135	App6	Facebook	2020-09-17	POKE PLATE | 379 kcal ☀️ Pack one plate a day with a rainbow of colour to get the full unique benefits of vegetables. Loaded with essential vitamins and minerals we need - with few calories! ✅ + 25g Yellow rice = 84kcal + Vegetables (all together) = 123 kcal + 40g Smoked chicken fillet = 46 kcal + 50g Fried chicken fillet = 94 kcal + 5g Baked crispy onions = 30 kcal + Green tea = 2 kcal	1
1136	App6	Facebook	2020-09-15	Refuel the right way with this quick and easy 5-ingredient post-workout meal! 😋 + 30g oatmeal + 150ml skim milk + 3-5 dates + a drizzle of peanut butter + your favourite fruit for topping A dish with the optimal amount of protein, carbs and healthy fat to replenish your body's needs and enhance muscle recovery, helping you stay on track towards your health goals! ✅💪	1
1137	App6	Facebook	2020-09-12	#SnackHack: Store hard-boiled eggs in the fridge for an easy snack fix or a nutritious addition to a balanced meal 🥚 🥗 They are low in calories, a great source of protein, make convenient travel food and safe to keep unpeeled in the fridge for up to one week!	1
1138	App6	Facebook	2020-09-10	✅ A simple plate of nutritious ingredients makes maintaining a healthy lifestyle easy and manageable. 🍽 Today's meal inspiration from the FS community with grilled salmon, millet, cucumber, tomatoes & balsamic glaze. A wholesome, fibre-rich meal that will boost healthy digestion and keep you satiated for longer to help you break away from unhealthy food habits!	1
1139	App6	Facebook	2020-09-08	'Chip, chip, chippin' away the fluff. Day 2 vs. Day 65. 20 pounds difference between these two pics. Only a few more pounds to go to get to my goal, but actually, if I don't hit the number on the scale that I want I'm totally ok with that, because I have accomplished so much in the last 65 days. I'm where I want to be physically and mentally. I've had some hard days during quarantine, along with …	1
1140	App6	Facebook	2020-09-06	Dinner can be a struggle when you're out of exciting ideas so that's why we've got you covered! Try bulgur wheat balls in a rich tomato sauce over roasted eggplant and yoghurt purée 😋 It's an exciting way to try a hearty and delicious vegetarian dish that's super satisfying and easy to make.	1
1141	App6	Facebook	2020-09-04	A simple, yet deliciously healthy dish that's perfect for those on-the-go moments 😋 It's packed with protein, fibre and essential vitamins that will keep you full and your body going strong. 🍽️ To make this FS member's plate for approx. 350 kcals, use 90g of baked chicken fillet and 43g of Adyghe cheese (or halloumi cheese). Then add as much nutrient-rich salad your plate can hold with spinach, c…	1
1142	App6	Facebook	2020-09-02	🌟 Woo! So proud of our member for achieving their goal! 🌟 Tracking your food intake is a simple act to have a greater understanding of your eating habits and help identify what's working for you and your health goals. Then taking small steps to build on those habits will help you achieve those goals and bring on long-term health success! ✅ Let us know if tracking your food affected your eating ha…	1
1143	App6	Facebook	2020-09-01	Roasted tomato soup topped with balsamic drizzle, curry baked zucchini and feta 😋 A fresh and tasty meal that will leave you feeling satisfied and energised.	1
1144	App6	Facebook	2020-08-29	If lentils aren't usually in your cooking repertoire, it's well worth starting. 💡Lentils are a nutrient-dense superfood. They're rich in plant protein, iron, folate and fibre. Also, they're easy to cook, cheap, and versatile so you can boost your health in a delicious way. 🍽 Below lentils are paired with carrot, zucchini, chillies, and garlic served with steak, broccoli and egg - incredibly tasty…	1
1145	App6	Facebook	2020-08-27	Eating healthy is deliciously easy if your meal is as colourful as this! 🍴This member's beautiful dish is roasted peppers and cherry tomatoes on a bed of (hidden) quinoa 😜 On the side is an arugula salad with watercress sprouts, goat cheese, almonds, cranberries and a squeeze of orange juice for dressing.	1
1146	App6	Facebook	2020-08-26	💪 If you're looking for ways to increase your protein intake, try mixing your favourite protein powder into a bowl of fibre-rich oatmeal. Along with a few fruity and flavourful toppings, you have a tasty balanced meal. Plus, not only is it good for breakfast but it's the perfect fuel for before or after a workout!	1
1147	App6	Facebook	2020-08-21	Avocado on wholemeal toast is the perfect breakfast or snack for long-lasting energy! Besides the creamy texture with crunchy goodness, there are many reasons to love it. Avocado is a healthy substitute for butter, as it's mostly unsaturated fat ('good' fat) instead of saturated fat ('bad' fat). Combined with the high fibre it has, it will promote stable blood sugar levels and satiation! 🙌	1
1148	App6	Facebook	2020-08-19	Corn tortillas packed with jerk black beans, seasoned tofu, avocado, mango salsa and red leaf lettuce. Another plate of delicious homemade tacos from a member! Plus, they're also vegan 😋 This is an easy dish to get creative with vegetables and spice up your weeknight dinners. It will no doubt satisfy your hunger and taste!	1
1149	App6	Facebook	2020-08-17	Homemade Thai yellow curry with vegetables and chicken 😋 An easy, flavourful, budget-friendly dish that makes for an ultimate meal that's comforting and good for you!	1
1150	App6	Facebook	2020-08-13	A nourishing power bowl of grains, greens and protein! No matter what diet you follow, your power bowl can be changed to be dairy free, meat free, soy free, or even grain free. It is a versatile, fresh and delicious way to encourage more nutritious foods in your diet! 🍽️ This FS member's power bowl has quinoa, salmon, avocado, greens, capsicum, and cabbage topped with spicy miso mayonnaise on top.	1
1151	App6	Facebook	2020-08-12	Nutritionally balanced and enjoyable food is the key to building a healthy lifestyle ✅ Fill your plate with a variety of vegetables, grains, protein and healthy fats to support your body's needs now and into the future. What's your favourite tips for making a healthy, yet tasty, plate?	1
1152	App6	Facebook	2020-08-09	Prepared fresh at home with nutritious ingredients, tacos can be the perfect clean weekday dish for any type of diet! 🌽 For a healthier option, use non-fried corn tortilla as they are low in fat and are a good source of fibre. 🥗 If you need a low-carb alternative, use lettuce cups as a healthy substitute and fun way to eat more greens. 🍽️ This FS member used both types of taco shells, spiced meat…	1
1153	App6	Facebook	2020-08-07	Golden crustless spinach quiche 😍 Simple, versatile and a must-have for your repertoire of quick evening meals. Omitting the crust makes it gluten-free, and saves cooking time and extra (although delicious) calories. FS member's recipe 👇 1. Season 250g of thawed creamed spinach with salt, pepper and chilli. Then add finely chopped herbs, capsicum and mushrooms (any vegetables will do). 2. Whisk 2…	1
1154	App6	Facebook	2020-08-05	When it comes to weight management, salmon served with vibrant vegetables is a great option to include in your meal planning ✅ One 4-ounce portion of Salmon has 24.5g protein, 6.7g fat and, of course, 0g of carbohydrates! Salmon is easy to prepare, rich in essential fatty acids, potassium and flavour. Our member's dish 👇 is a great example of pairing salmon with high-fibre foods to help you feel …	1
1155	App6	twitter	2021-01-24	When it's a hot day, this #simplesalad is the way to go. Spinach, cucumber, tomato, pomegranate & marinated feta with a light aioli dressing. To bulk it up: • for a protein kick, add shredded chicken or chickpeas. • for carb power, add quinoa or roasted sweet potato.	1
1156	App6	twitter	2021-01-21	⭐ Daily reminder from our FS community to always keep going! '2020 is over and it was a pretty successful year in terms of acceptance. I've let it go for the last few weeks and now I will attack again. I won't put pressure nor a time frame on myself. It comes when it comes!'	1
1157	App6	twitter	2021-01-20	Rather than eliminating #snacktime, use it as an opportunity to get in even more healthy carbs, fats, protein and antioxidants What's your go-to healthy and filling snack combination? Green saladRaised fist	1
1158	App6	twitter	2021-01-15	1 egg, 1 zucchini, 30g of almond flour and 2 tbsp grated parmesan cheese (and maybe some tasty sides) is all you need for these Zucchini and Parmesan Fritters. Easy, quick, and helps you get in the good stuff the delicious way.	1
1159	App6	twitter	2021-01-12	Easy #Keto Spinach Pie cooked by an FS member 4 eggs 50 g cooked ham 30 g grated cheese 300 g chopped spinach 200 g light cream cheese Combine ingredients and pour the mixture in a non-stick tart pan. Bake at 180° for 20 minutes until cooked.	1
1160	App6	twitter	2021-01-04	This homemade #vegetarian stuffed pepper is a satisfying dish with a low-fat twist! Instead of high fat and salty cheese fillings, opt for silken tofu in your mixture. Trust us! It's a creamy way to add low-fat protein and will make your delicious flavours shine.	1
1161	App6	twitter	2020-12-28	Having a batch of #healthygranola is great for quick access to enjoy a satisfying, easy meal any time of the week! ⁠ ⁠ Fork and knife with plate 269 kcals Down pointing backhand index⁠ ⁠ 100 ml unsweetened almond milk⁠ 1 apple⁠ 20 g pistachio granola⁠ 1 tbsp peanut butter⁠	1
1162	App6	twitter	2020-12-27	For a healthy start to your Sunday morning, try cooking up a simple plate of scrambled eggs with sauteed mushrooms & zucchini. A fast way to get an easy protein and fibre hit White heavy check mark ⁠⁠	1
1163	App6	twitter	2020-12-24	Simple tips for a healthy Christmas	1
1164	App6	twitter	2020-12-04	Do you use dark mode on your phone? Yes - iOS 38.3% No - iOS 8.5% Yes - Android 42.6% No - Android 10.6%	1
1165	App6	twitter	2020-10-14	Scheduled maintenance. Most of our services will be temp unavailable from: Melbourne: 21 Oct (10:30am) London: 21 Oct (12:30am) Moscow: 21 Oct (2:30am) NY: 20 Oct (7:30pm) Rio : 20 Oct (8:30pm) LA: 20 Oct (4:30pm) Seoul: 21 Oct (9:30am) Update posted once services are restored.	1
1166	Org3	twitter	2020-12-26	At http://obesitycompetencies.gwu.edu, we offer 10 case studies that showcase real-world #ObesityCareCompentency integration strategies that might inspire leaders in each profession to prioritize #obesity education. Check it out!	1
1167	Org3	twitter	2020-12-25	Want to learn more about #Obesity and cancer? Read this month's edition of our Letter from the Director! http://mailchi.mp/gwu/dec28	1
1168	Org3	twitter	2020-12-24	#FastFact: A person’s body weight can affect the accessibility of certain cancer treatments like radiographic imaging, chemotherapy, radiation therapy, and surgery and the outcomes of those treatments. Learn more w/ our NEW #Obesity and Cancer Fact Sheet: https://stop.publichealth.gwu.edu/sites/stop.publichealth.gwu.edu/files/STOP%20Fact%20Sheet_%20Obesity%20and%20Cancer.pdf	1
1169	Org3	twitter	2020-12-22	In this http://WhyWeightGuide.org video, our medical director	1
1170	Org3	twitter	2020-12-21	@scottkahan	1
1171	Org3	twitter	2020-12-19	acts out clear examples of what NOT to do when discussing #weight and #health with patients including: blaming/shaming lecturing/talking down using authoritarian commands	1
1172	Org3	twitter	2020-12-18	#FastFact: did you know that the most-cited reason that those living with #obesity gave for not seeking medical help was perceived personal responsibility for their weight? Learn more with our fact sheet on Weight Bias and Stigma: http://stop.publichealth.gwu.edu/sites/stop.publichealth.gwu.edu/files/Weight%20Bias%20and%20Stigma.pdf	12
1173	Org3	twitter	2020-12-17	Scenario: Your son, who is of average weight, pokes fun of your daughter and calls her “fat.” What do you say?	1
1174	Org3	twitter	2020-12-16	The U.S. adult #obesity rate has surpassed 40%. To help address this important issue	1
1175	Org3	twitter	2020-12-15	@STOPobesity	1
1176	Org3	twitter	2020-12-14	has released the NEW #WeightCantWait guide to provide short, accessible and practical information on effective #obesity management. http://go.gwu.edu/weightcantweight…	1
1177	Org3	twitter	2020-12-13		1
1178	Org3	twitter	2020-12-12	What’s your learning style? At http://obesitycompetencies.gwu.edu, you can find resources that enhance your #obesity competencies and accommodate your personal learning style!	1
1179	Org3	twitter	2020-12-11	This week we’re using our #SaturdaySTOPSpotlight to highlight	1
1180	Org3	twitter	2020-12-07	! In acknowledgement of #NationalDiabetesMonth, they’re sharing this Diabetes Leadership Toolkit for the effective management and treatment of diabetes. https://bit.ly/3eXxQSe	1
1181	Org3	twitter	2020-12-05	Effective obesity management does not end after a patient exits the building. Providers: the #WeightCantWait guide offers practical advice on how to follow-up with patients after the clinical encounter. http://go.gwu.edu/weightcantwait	1
1182	Org3	twitter	2020-12-02	Want to learn more about the causes of #obesity? Check out our #FastFact sheet to learn about how: •Behavioral •Economic •Environmental •Genetic & other factors contribute to this complex disease.	3	complex disease, 4, behavioral economic environmental genetic
1183	Org3	twitter	2020-12-24	#FastFact: Workers within the food system often experience suboptimal working conditions, poor health, and poverty, all of which contribute to food insecurity, susceptibility to #COVID19, and disruptions of the food supply chain.	1
1184	Org3	twitter	2020-12-23	Healthcare providers: on our Why Weight site we offer videos showing you how to hold effective conversations about #weight and #health with your patients. Visit: http://whyweightguide.org/videos.php	1
1185	Org3	twitter	2020-12-23	in their #LivingWithObesity campaign, it is important to understand that when people living with #obesity internalize weight stigma, they apply harmful stereotypes to themselves, damaging their emotional and physical health.	12
1186	Org3	twitter	2020-11-09	#Obesity is a severe risk factor for #COVID19 related morbidity/mortality. Healthcare providers: access short, accessible, and practical information to support you in delivering effective #obesity management with the guide. http://go.gwu.edu/weightcantwait	7	COVID complicatios
1187	Org3	twitter	2020-11-08	Our #SaturdaySTOPSpotlight for this week is the @oaactionallianc ! A leader in the prevention & management of #osteoarthritis, we are lucky to have the OA Action Alliance as a #STOP member. Check out their Lunch & Learn event on November 18th:	1
1188	Org3	twitter	2020-11-06	At http://stop.publichealth.gwu.edu/policy we offer a state-by-state analysis of Medicaid and State-Employee health insurance coverage for #obesity prevention and treatment ––an important consideration as obesity increases the risk of #COVID19 related morbidity and mortality.	7	COVID complicatios; insurance coverage for treatment
1189	Org3	twitter	2020-11-06	developed a 15-credit #Obesity and Health minor that covers these key #ObesityCareCompetencies: -Obesity as a disease -Care disparities/inequities -Community care -Lang. for obesity -Care strategies	1
1190	Org3	twitter	2020-11-01	This week, we’re shining our #SaturdaySTOPSpotlight on	1
1191	Org3	twitter	2020-10-25	It is critical that health care professionals demonstrate an applied understanding of the #ObesityCareCompetencies in order to deliver effective #obesity care. For our guide and resources, visit http://obesitycompetencies.gwu.edu	1
1192	Org3	twitter	2020-10-24	#FastFact People living with #obesity have high levels of internalized weight stigma, making it harder for them to seek medical care. Learn more with our Fact sheet on Weight Bias and Stigma. #NHEW2020	12
1193	Org3	twitter	2020-10-17	educators have developed an oral health curriculum that will be available for training predoctoral dental students and prelicensure dental hygiene students at other institutions.	1
1194	Org3	twitter	2020-10-12	DYK that perceived weight-based discrimination rose 66% btw 1990s & 2000s? Weight bias & stigma can be harmful to the personal lives and clinical experiences of those w/ obesity.	12
1195	Org3	twitter	2020-10-11	Are you a provider or community leader who works with parents?	1
1196	Org3	twitter	2020-10-07	Today is #WorldMentalHealthDay. Obesity and weight bias are associated w anxiety and mood disorders. People w severe mental illness can suffer from #obesity. You are not alone. Seek support and medical treatment when you need it. There are effective medical treatments out there.	12
1197	Org3	twitter	2020-10-06	Research shows that people w #obesity have greater odds of developing depression and people w depression have greater odds of developing obesity. On #WorldMentalHealthDay we recognize the need to ensure that quality mental health care is available to everyone who needs it.	7	depression and depression as risk factor or cause	5	depression
1198	Org3	twitter	2020-10-05	! This upcoming Malnutrition Awareness Week they’re offering resources to educate healthcare professionals, educate consumers/patients, and increase awareness of nutrition’s role on patient recovery.	1
1199	Org3	twitter	2020-10-04	Moving forward we need to be asking ourselves: What can we do to prevent childhood obesity?	1
1200	Org3	twitter	2020-10-03	Today marks the end of #HealthyAgingMonth but #obesity & #weight mgmt should be considered critical components of our overall health every day. Parents & caregivers, healthcare profs. & individuals who want to effectively address weight: visit	1
1201	Org3	twitter	2020-10-02	#Obesity disproportionately affects communities of color, putting those populations at higher risk of #COVID19 morbidity and mortality. Learn more with our #FastFact sheet located on our website at:	7	covid
1202	Org3	twitter	2020-10-02	piece with a doctor’s honest apology towards patients living w/ obesity.	1
1203	Org3	twitter	2020-10-02	In 2011 when the US failed to achieve the Healthy People 2010 obesity goals,	1
1204	Org3	twitter	2020-09-07	Scenario 2: Your child asks, “Am I fat?” and says they want to go on a diet. They are emotional because they say they look different than the other kids in their class. What do you say?	1
1205	Org3	twitter	2020-08-25	Recognizing #obesity as a complicated disease is also an important first step for health care providers to confront #weightbias and stigma and enhance their care for patients living with obesity!	3	"complicated disease"	12
1206	Org3	twitter	2020-08-21	Are you an #educator looking to enhance your students’ understanding of #obesity & teach effective skills in #obesity prevention and management? At http://ObesityCompetencies.gwu.edu, we’ve gathered helpful resources relevant to your profession. Visit our site & learn about our approach!	1
1207	Org3	twitter	2020-08-19	#ObesityCareCompetency #4: Describe the benefits of working interprofessionally to address #Obesity to achieve results that cannot be achieved by 1 health professional. Enhancing the #OCCs requires collaboration & dialogue across healthcare professions.	1
1208	Org3	twitter	2020-08-17	At @ChildrensNatl educators created a home-visitation curriculum to improve medical residents’ knowledge of the #SDOH & #Obesity. Participants reported improved counseling skills & felt it was a valuable experience. #ObesityCareCompetencies	1
1209	Org3	twitter	2020-08-17	#NAFLD affects 1/4 Americans and is now the most common cause of liver dysfunction. The onset and progression of NAFLD are closely linked to insulin resistance & abdominal #obesity in both adults & children.	7	nafld
1210	Org7	Facebook	2021-01-28	There is still time to register for this webinar from ABOM partner The Obesity Society taking place next week.	1
1211	Org7	Facebook	2021-01-21	ABOM partner Obesity Medicine Association just released an updated version of its Obesity Algorithm. Details below!	1
1212	Org7	Facebook	2021-01-13	The COVID-19 pandemic did not slow the growth of interest in obesity medicine certification. More than 1,400 physicians will sit for the 2021 ABOM exam next month.	1
1213	Org7	Facebook	2020-12-16	Don't miss this valuable new resource from ABOM partner STOP Obesity Alliance: Weight Can't Wait- A Guide For The Management Of Obesity In The Primary Care Setting. It is a short, accessible, practical, informative guide for obesity treatment broken down into three parts: the Pre-encounter, the Encounter, and the Post-encounter.	1
1214	Org7	Facebook	2020-11-16	Here is your motivation to get your application for the 2021 #obesity medicine certification exam done TODAY (instead of waiting for the December 1 deadline)!	1
1215	Org7	Facebook	2020-11-11	Congratulations to Dr. Caroline Apovian who was selected as this year’s recipient of the ABOM Distinguished Leader in Obesity Medicine award!	1
1216	Org7	Facebook	2020-10-13	Read about a new diplomate-authored study that shows ABOM physicians practice evidence-based care	1
1217	Org7	Facebook	2020-09-17	Earn GROUP ONE credits at this virtual meeting next month and apply for the next ABOM exam by December 1!	1
1218	Org7	Facebook	2020-09-17	The latest State of Obesity report from Trust for America's Health shows the highest ever adult #obesity rate: 42%.	1
1219	Org7	Facebook	2020-09-08	ABOM Diplomate Dr. J. David Prologo advocates for a change in the way #obesity is treated: "A perspective based in objectivity and equality will allow caregivers to escape the antiquated blaming approach and perceive those with overweight or obese conditions in the same light as those with other diseases. Only then will we finally shift the paradigm."	3	perceive obese in the same light as any other disease
1220	Org7	Facebook	2020-09-04	ABOM Diplomate Dr. Adam Tsai contributes to The New England Journal of Medicine editorial "Addressing Disparities in the Management of Obesity in Primary Care Settings"	1
1221	Org7	Facebook	2020-09-03	Sept. 16 workshop will highlight the real-world use of systems applications in obesity prevention and treatment. The session will conclude with an expert panel who will discuss the next steps needed to advance progress in the field. Sign up now!	1
1222	Org7	Facebook	2020-09-02	As part of its ongoing response to COVID-19, ABOM is piloting a program to allow 2021 exam candidates the opportunity to take the February certification exam from their own home or office through live remote proctoring.	1
1223	Org7	Facebook	2020-08-11	ABOM Diplomate Dr. Julie Benard talks to Good Housekeeping about "hunger pangs:"	1
1224	Org7	Facebook	2020-08-06	ABOM 2019 Distinguished Leader in Obesity Medicine Dr. Arya Sharma talks to CNN about Canada's new #obesity treatment guidelines: "Obesity management has to be based on the principles of chronic disease management, which means any quick fix ... none of that is going to have a long-term impact." Article title: In Canada, obesity will no longer be determined by weight alone.	3	Obesity management has to be based on the principles of chronic disease management,
1225	Org7	Facebook	2020-08-04	Credits earned through attendance at any of these courses can be applied toward the ABOM GROUP ONE requirement.	1
1226	Org7	twitter	2021-01-21	ABOM partner @OMAsocial just released an updated version of its Obesity Algorithm, an evidence-based guideline for #obesity care.	1
1227	Org7	twitter	2021-01-13	The COVID-19 pandemic did not slow the growth of interest in obesity medicine certification. More than 1,400 physicians will sit for the 2021 ABOM exam next month.	1
1228	Org7	twitter	2020-12-16	Calling all ABOM diplomates (and future diplomates)! Don't miss Weight Can't Wait: A Guide For the Management of Obesity in the Primary Care Setting from ABOM partner @STOPObesity	1
1229	Org7	twitter	2020-11-16	Here is motivation to get your application for the 2021 #obesity medicine certification exam done TODAY (instead of waiting for the December 1 deadline)!	1
1230	Org7	twitter	2020-11-11	Congratulations to @MarsApovian for being selected as the 2020 recipient of the ABOM Distinguished Leader in Obesity Medicine award!	1
1231	Org7	twitter	2020-10-13	New study shows ABOM diplomates practice evidence-based care	1
1232	Org7	twitter	2020-09-17	U.S. Adult Obesity Rate Tops 42 Percent; Highest Ever Recorded	1
1233	Org7	twitter	2020-09-08	ABOM Dipl. @jdprologo advocates for change in #obesity treatment: "For starters, we need a new approach, founded on respect and dignity for patients."	1
1234	Org7	twitter	2020-09-04	ABOM Diplomate Dr. Adam Tsai co-authors @NEJM editorial "Addressing Disparities in the Management of Obesity in Primary Care Settings:"	1
1235	Org7	twitter	2020-09-03	Sept. 16 session will highlight real-world use of systems applications in #obesity prevention and treatment. Sign up now! Using Systems Applications to Inform Obesity Solutions: A Workshop	1
1236	Org7	twitter	2020-09-02	As part of its ongoing response to COVID-19, ABOM is piloting a program offering 2021 exam candidates the chance to take the certification exam from their own home or office through live remote proctoring.	1
1237	Org7	twitter	2020-08-05	ABOM Diplomate @seanwharton is the lead author of new guidelines for #obesity treatment in Canada advising "care should be based on evidence-based principles of chronic disease management."	3	care should be based on evidence-based principles of chronic disease management.
1238	Org8	facebook	2021-01-30	Is it time for a Focused Designation Practice (FDP) and new certification? RE-VISION: The Future of ASMBS #revision21	1
1239	Org8	facebook	2021-01-30	Presidential Pivots - not to be missed RE-VISION: The Future of ASMBS #revision21	1
1240	Org8	facebook	2021-01-30	Still deciding which session to pick? Tough one - Have you tried 2 screens? Hurry they are starting soon RE-VISION: The Future of ASMBS #revision21	1
1241	Org8	facebook	2021-01-30	At The Movies - Video Session 3: Actual Re-Visions. Great line up of speakers RE-VISION: The Future of ASMBS	1
1242	Org8	facebook	2021-01-30	#revision21 starting strong this morning with a very controversial topic "Robotic Bariatric Surgery"	11	"Robotic bariatric surgery"
1243	Org8	facebook	2021-01-30	Who's ready for a great Day 2 of RE-VISION: The Future of ASMBS Weekend Meeting? Comment to let us know what sessions you'll be attending! revision.asmbs.org #ASMBSREVISION #REVISION21	1
1244	Org8	facebook	2021-01-30	ICYMI: Recordings for each session will be available for 30 days after our event. #revision21	1
1245	Org8	facebook	2021-01-30	Awesome/Scary Video Session - Video Session 2: Disaster 2020! #revision21	1
1246	Org8	facebook	2021-01-30	Ready for movie night? Don't forget the popcorn. join us for Video Session 2: Disaster 2020! #revision21	1
1247	Org8	facebook	2021-01-29	How to implement modified DS? #revision21	1
1248	Org8	facebook	2021-01-29	Is the modified DS the next Gold Standard?	1
1249	Org8	facebook	2021-01-29	Difficult topic - Re-Visioning Weight Regain After Surgery Great speakers	1
1250	Org8	facebook	2021-01-29	Support Groups & Social Media During A Global Pandemic #revision21	1
1251	Org8	facebook	2021-01-29	No matter what technique you use for Gastric bypass you will for sure find it in this session - Breaking Down the Bypass, Step by Step #revision21 https://revision.asmbs.org/conferences/b1432fe583e9/bigroom	11	"gastric bypass"
1252	Org8	facebook	2021-01-29	Have you been to the chat Rooms yet? https://revision.asmbs.org/series/lounge53/lounge	1
1253	Org8	facebook	2021-01-29	Going to the next session? It will start soon - Video Session 1: Breaking Down the Bypass, Step by Step	1
1254	Org8	facebook	2021-01-29	Great session about Re-flux and the sleeve	1
1255	Org8	facebook	2021-01-29	Four incredible concurrent sessions - #revision21 #asmbs	1
1256	Org8	facebook	2021-01-29	All you need to know about Reflux and Sleeve!!! . #revision21 #asmbs	1
1257	Org8	facebook	2021-01-29	All you need to know about re-flux and the sleeve #revision21. Promise to be a great session	1
1258	Org8	facebook	2021-01-29	Opening session starting soon #REVISION21	1
1259	Org8	facebook	2021-01-29	Can Bariatric Surgery Be Done as an Outpatient Procedure? 👀	11	"bariatric surgery"
1260	Org8	facebook	2021-01-29	It's Day 1 of RE-VISION: The Future of #ASMBS Weekend Meeting! Check out the schedule of our first day. Visit http://revision.asmbs.org to view the session descriptions, speakers, and more. It's not too late to register - reserve your spot now! #ASMBSREVISION #REVISION21	1
1261	Org8	facebook	2021-01-29	It's Day 1 of RE-VISION: The Future of ASMBS Weekend Meeting! Check out the schedule of our first day of sessions. Visit revision.asmbs.org to view the full session descriptions, speakers, and more. It's also not too late to register - reserve your spot now! #ASMBSREVISION #REVISION21	1
1262	Org8	facebook	2021-01-28	ONE DAY Left to RE-VISION: The Future of ASMBS Weekend Meeting! There's still time to register! Visit revision.asmbs.org for more information. Please contact us at events@asmbs.org if you have questions regarding the meeting. #ASMBSREVISION #REVISION21	1
1263	Org8	facebook	2021-01-26	Three Days Left to RE-VISION: The Future of ASMBS Weekend Meeting! In addition to numerous educational sessions, we have networking opportunities! Use the chat rooms in the Lounge and fill out your virtual business card to share your information with fellow attendees and grow your network. Visit revision.asmbs.org for more information #ASMBSREVISION	1
1264	Org8	facebook	2021-01-25	Join us for RE-VISION: The Future of ASMBS Weekend Meeting Dates: Friday, January 29th & Saturday, January 30th Website: revision.asmbs.org https://www.youtube.com/watch?v=dXXIxvZ9ycY	1
1265	Org8	facebook	2021-01-24	Five Days Left to RE-VISION: The Future of ASMBS Weekend Meeting! Have you registered yet? Join the conversation on social media using the official hashtag - #ASMBSREVISION and invite friends and colleagues! Visit revision.asmbs.org for more information.	1
1266	Org8	facebook	2021-01-22	One Week Left to RE-VISION: The Future of ASMBS Weekend Meeting! CME/MOC and CEU/APA/ASWB credits are available - including for Behavioral Health Providers! Reserve your spot for the live event PLUS have access to all recorded sessions after the meeting. Space is limited - Register Now: http://ow.ly/H7Kh50DeqCp	1
1267	Org8	facebook	2021-01-21	ASMBS is proud to support the Stop Weight Bias Campaign! We believe that everyone deserves to be treated with dignity and respect - it's time to end weight discrimination and create a better world for everyone. Obesity Action Coalition (OAC) #BePartOfTheSolution #StopWeightBias StopWeightBias.com	12
1268	Org8	facebook	2021-01-20	New Year, New Sessions! Register for RE-VISION: The Future of ASMBS Weekend Meeting, featuring new CME/CEU courses to help you navigate the ongoing COVID-19 pandemic. Visit revision.asmbs.org to reserve your spot - space is limited!! #ASMBSREVISION	1
1269	Org8	facebook	2021-01-13	ASMBS members receive a discounted registration to RE-VISION: The Future of ASMBS Weekend Meeting! Go to revision.asmbs.org to reserve your spot. Renew your membership or become a member today. Visit ASMBS.org/Membership to get started. #ASMBSREVISION	1
1270	Org8	facebook	2021-01-11	Register, mark yourself as "Going", and share the event with friends and colleagues! Visit revision.asmbs.org for more.	1
1271	Org8	facebook	2021-01-06	Join us, January 29th & 30th, for RE-VISION: The Future of ASMBS Weekend Meeting. This educational program will feature new courses for both surgeon and integrated health members, engaging networking events, and opportunities to connect with expert industry professionals. Virtual sessions will feature interactive discussions, debates, and relevant topics. Registration is open now! Visit revision.…	1
1272	Org8	facebook	2021-01-04	Abstracts now accepted through January 13th! Submit yours today #ASMBS21	1
1273	Org8	facebook	2020-12-28	Register now for the next #FELLOWProject lecture! Dr. Phil Schauer will be discussing The Evidence for Metabolic Surgery – Current Status and Future Directions next Friday, January 8th at 7am & 3pm EST. Visit our website for to register now! http://ow.ly/ZSfv50COtp8	1
1274	Org8	facebook	2020-12-22	Happy Holidays and Happy New Year! Thank you for your support during this unique and demanding year. We look forward to continuing to fight alongside our members and on behalf of patients worldwide for the right to evidence-based treatment for the disease of obesity.	3	"right to evidence-based treatment for the disease of obesity."
1275	Org8	facebook	2020-12-18	ICYMI: Registration is open for RE-VISION: The Future of ASMBS! Reserve your spot and invite colleagues and friends!	1
1276	Org8	facebook	2020-12-14	“We’re trying to see how we can level the playing field, make it easier to ascend the ladder of leadership, and make the membership of ASMBS more meaningful.“ - Abdelrahman Nimeri, MD FACS Hear more from Dr. Nimeri about his experience as a member the ASMBS Diversity & Inclusion Committee #ASMBSisMe	1
1277	Org8	facebook	2020-11-26	Happy Thanksgiving from ASMBS! We hope you have a safe and healthy #ThanksgivingDay 🦃	1
1278	Org8	facebook	2020-11-23	Register now for the next installment in the #FELLOWProject! Guest lecturers, Drs. Leslie Heinberg and Gretchen Ames, will be discussing Psychologic Considerations Before & After Bariatric Surgery next Friday, December 4th at 7am & 3pm EST. Register now: http://ow.ly/QyEp50CsvxF	11	"bariatric surgery"
1279	Org8	facebook	2020-11-20	The recording of the this week's SADI-S webinar is now available! Thank you to our speakers, moderator, and all participants for a great presentation. Click here to watch now: http://ow.ly/CMao50CqhyB	1
1280	Org8	facebook	2020-11-19	"Rural healthcare is more important today than ever before. The care provided in rural communities allows people to get the help they need right away, without traveling a long distance from home to get it. Rural healthcare providers rise to the challenge of caring for people often with limited resources, while also participating as active members and leaders in their communities. We celebrate Nat…	1
1281	Org8	facebook	2020-11-18	The ASMBS 2021 Annual Meeting abstract submission window is now open! Submit your abstract today: http://ow.ly/wDQG50Co5nl #ASMBS21	1
1282	Org8	facebook	2020-11-16	It's that time of the year! Renew your membership to stay involved with ASMBS in the upcoming year. Visit ASMBS.org/Dashboard to renew today. Not a member? Go to ASMBS.org/Membership for more information and to submit an application.	1
1283	Org8	facebook	2020-11-14	Today is #WorldDiabetesDay and we are proud to share EscapeDiabetes.org - a resource where you can read about surgery for Type 2 diabetes, calculator your risks, and find a provider to learn how you can #EscapeDiabetes! #NationalDiabetesMonth #T2DM	1
1284	Org8	facebook	2020-11-10	Join us, January 29th & 30th, for the ASMBS 2021 Weekend Meeting - RE-VISON: The Future of ASMBS. Our program will include new courses for both surgeon and integrated health members, engaging networking events, and opportunities to connect with expert industry professionals. Virtual sessions will feature interactive discussions, debates, and relevant topics. Full schedule and registration will be…	1
1285	Org8	facebook	2020-11-04	Join us for our next webinar - Wednesday, November 18th at 7:00 PM EST. This webinar focuses on educating the attendees on the recently ASMBS endorsed procedure, the Single Anastomosis Duodenal Switch. Topics will include an explanation of the procedure, postop management, complications and other considerations when caring for patients who have had the SADS/SADI/SIPS/Mod DS. Register Now: https:/…	1
1286	Org8	facebook	2020-11-01	November is #DiabetesAwarenessMonth! Learn how surgery for diabetes can help you manage your Type 2 #diabetes. Visit EscapeDiabetes.org for more information. #NationalDiabetesMonth #T2DM	1
1287	Org8	facebook	2020-10-27	Register now for the next installment in the #FELLOWProject! Guest lecturers, Drs. Ann Rogers & S. Julie-Ann Lloyd, will be discussing Peri-operative Management Pearl in Bariatric Surgery next Friday, November 6th at 7am & 3pm EST. Click here for more information: http://ow.ly/4y4U50C2VGo	1
1288	Org8	facebook	2020-10-26	The recording of the “Who You Gonna Call” #Telemedicine Webinar is now available! Thank you to all participants and attendees for a great discussion! Click here to watch now: http://ow.ly/Zywr50C2D28 Visit ASMBS.org/Webinars to view our full webinar archive and register for more upcoming events!	1
1289	Org8	facebook	2020-10-19	“I think it’s so important for our voices to be heard, to share ideas, and to enable action so that all of our membership feel like they have a voice at the table. “ - Janet Ng, PhD Hear more from Dr. Ng about her experience as a member the ASMBS Diversity & Inclusion Committee #ASMBSisMe	1
1290	Org8	facebook	2020-10-15	We invite you to join us as we honor the life and accomplishments of Harvey Sugerman. Tonight's program will be livestreamed here on Facebook. Tune in at 8pm Eastern Time to help celebrate the legacy of Dr. Sugerman.	1
1291	Org8	facebook	2020-10-09	Join us for our next #IntegratedHealth webinar on Thursday, October 22nd, at 7:00 PM EDT. Our three expert speakers will answer your questions and share tips for utilizing #telemedicine in your practice as the #COVID19 pandemic continues. Register Now: http://ow.ly/7Yoi50BOht4	1
1292	Org8	facebook	2020-10-07	The recording of the most recent #FELLOWProject webinar is now available! Thank you to our speakers for a great presentation. Click here to watch now and register for the upcoming November edition: http://ow.ly/gIsn50BMmbB	1
1293	Org8	facebook	2020-09-30	ASMBS and the Obesity Medicine Association are partnering for a pre-conference course during this year's Overcoming #Obesity 2020 - Virtual on Thursday, October 8th! Learn about Embracing Multidisciplinary Care - Medical and Surgical Care Under One Roof and earn 7.5 CME/CE. Register today! http://ow.ly/bfQL50BFL7Q	1
1294	Org8	facebook	2020-09-28	ASMBS member Dr. Anne P. Ehlers discusses the underutilization of #bariatricsurgery via The New York Times	11	"bariatric surgery"
1295	Org8	facebook	2020-09-27	National Walk from Obesity Day	1
1296	Org8	facebook	2020-09-26	It’s National Walk from Obesity Day! A day that we come together as ONE community to walk and raise awareness of the disease of obesity 👟💛 #WalkFromObesity #NationalWFODay #ObesityResearch #ObesityAwareness	3	"raise awareness of the disease of obesity"
1297	Org8	facebook	2020-09-25	“We are working to support our diverse membership by increasing our visibility and programming to further educational diversity, inclusion, and equity. By doing so, we hope to influence any practices accordingly within our organization.” - Crystal Johnson-Mann, MD Hear more about Dr. Johnson-Mann’s experience as a member of the ASMBS Diversity & Inclusion Committee #ASMBSisME	1
1298	Org8	facebook	2020-09-24	Registration Now Open for ASMBS/OMA Embracing Multidisciplinary Care Pre-conference Course - https://mailchi.mp/asmbs/embracing-multidisciplinary-care	1
1299	Org8	facebook	2020-09-22	Register now for the next installment in The FELLOW Project! Guest lecturers, Drs. Bipan Chand & Dr. Leena Khaitan, will be discussing endoscopy for the bariatric surgeon next Friday, October 2nd at 7am & 3pm EST. Click here for more information: http://ow.ly/kFa950By1o2	11	"bariatric surgery"
1300	Org8	facebook	2020-09-21	The recording of the Resuming Practice webinar is now available! Thank you to all participants and attendees for a great discussion! Click here to watch now: http://ow.ly/5TV650Bx4l8 Visit ASMBS.org/Webinars to view our full webinar archive and register more upcoming events!	1
1301	Org8	facebook	2020-09-18	“I really want to tackle head-on, health disparities in our specialty.” - Joon Shim, MD MPH FACS Hear more from Dr. Shim about her goals as a member of the ASMBS Diversity & Inclusion Committee #ASMBSisME	1
1302	Org8	facebook	2020-09-17	We invite you to join us as we honor the life and accomplishments of Dr. Harvey Sugerman - Surgeon, Scientist, Educator, and Leader. Click here to register: http://ow.ly/ieNn50BtyAm Click here to submit a tribute video to be featured during the presentation: https://www.tribute.co/harvey-sugerman/	1
1303	Org8	facebook	2020-09-10	Register for our next webinar! Members from the Community/Independent Practice Committee will discuss strategies for increasing revenue stream. A question and answer session will conclude the presentation. Reserve your spot: http://ow.ly/4sQu50Bnhmw	1
1304	Org8	facebook	2020-09-04	ASMBS is proud to celebrate women treating obesity this September. Thank you to the surgeons, nurses, physicians, dietitians, coordinators, and all other women in bariatrics for the impact you make on our specialty and Society. #WomeninMedicine #WIMMonth Join us in honoring the dedicated and compassionate women of ASMBS. This year's theme is "Advancing Equity, Creating Change." Submit a photo of …	11	"bariatric surgery"
1305	Org8	facebook	2020-09-03	ASMBS is proud to celebrate women treating obesity this September. Thank you to the surgeons, nurses, physicians, dietitians, coordinators, and all other women in bariatrics for the impact you make on our specialty and Society. #WomeninMedicine #WIMMonth Join us in honoring the dedicated and compassionate women of ASMBS. This year's theme is "Advancing Equity, Creating Change." Submit a photo of …	11	"bariatric surgery"
1306	Org8	facebook	2020-09-01	Register now for the next installment in The FELLOW Project! Guest lecturers, Dr. Daniel Cottam & Dr. Folahan Ayoola, will be discussing the duodenal switch & SADI-S this Friday, September 4th at 7am & 3pm EST. Click here for more information: http://ow.ly/L30G50B3QrP Note: If you previously registered for the August 7th webinar, you are not required to complete the registration form again. Your …	1
1307	Org8	facebook	2020-08-31	Register now for the next installment in The FELLOW Project! Guest lecturers, Dr. Daniel Cottam & Dr. Folahan Ayoola, will be discussing the duodenal switch & SADI-S this Friday, September 4th at 7am & 3pm EST. Click here for more information: http://ow.ly/L30G50B3QrP Note: If you previously registered for the August 7th webinar, you are not required to complete the registration form again. Your …	1
1308	Org8	facebook	2020-08-28	ASMBS is joining the ASMBS Foundation and Walk from Obesity for #NationalWFODay on September 26th and you should too! Register for FREE and fundraise for an important cause. The walk is 100% virtual, so you choose where, when, and who you walk with. Visit walkfromobesity.com/virtual for more information about starting a team and getting involved! #WhyIWalk #WalkfromObesity	1
1309	Org8	facebook	2020-08-26	Last Chance to Register! Join our three expert speakers for TOMORROW'S #ASMBSIH webinar: http://ow.ly/bb0u50B9KD2 Have questions for our panelists? Comment below or send us an email at communications@asmbs.org for a chance to have your question featured during our live event.	1
1310	Org8	facebook	2020-08-11	We mourn the recent passing of Dr. Harvey Sugerman - a beloved icon in our field. Harvey was the President of the ASMBS from 2004-5 and Founding Chief Editor of SOARD. He put SOARD on the map of high quality, successful journals. He was a true renaissance man, always seeking knowledge. His studies included bariatric surgery, trauma, pulmonary edema, the deleterious effects of elevated abdominal p…	1
1311	Org8	facebook	2020-08-10	Join us for our next #IntegratedHealth webinar on Thursday, August 27th, at 7:00 PM EST. Our three expert speakers will answer your questions and share tips for helping patients navigate new challenges and stressors presented by #COVID19. Register Now: http://ow.ly/NYtX50AVuFe	1
1312	Org8	facebook	2020-08-04	Reminder! Registration is open for the first Fellow Project webinar - this Friday, August 7th at 7am & 3pm EST. Click here for more information and to reserve your spot now: http://ow.ly/IXA850AQrYj	1
1313	Org8	twitter	2021-01-30	Join us for Day 2 of @ASMBS #Revision21! Going on now #Robotics for complex Bariatric revisions!!! So much good information!!! #ASMBSREVISION #asmbs	11	"bariatric surgery"
1314	Org8	twitter	2021-01-30	The #SADIS is now an endorsed procedure by @asmbs - see how to get it covered by insurance at the access to care meeting #revision21 #asmbsrevision great talk by Bo Neichoy MD (not on @twitter )	1
1315	Org8	twitter	2021-01-30	A great discussion on same day #bariatricsurgery yesterday at #ASMBSREVISION #revision21 see this great paper from @SOARD_JOURNAL @RaulRosenthalMD @ZaherToumi Quote Tweet	11	"bariatric surgery"
1316	Org8	twitter	2021-01-30	#ASMBSREVISION #revision21	1
1317	Org8	twitter	2021-01-30	#revision21 #ASMBSREVISION @asmbs	1
1318	Org8	twitter	2021-01-30	Who's ready for a great Day 2 of RE-VISION: The Future of ASMBS Weekend Meeting? Comment to let us know what sessions you'll be attending! http://revision.asmbs.org #ASMBSREVISION #REVISION21	1
1319	Org8	twitter	2021-01-29	Opening session of #REVISION21 is happening now! Join ASMBS Program Leadership & President Hutter as we kick-off the meeting! #ASMBSREVISION	1
1320	Org8	twitter	2021-01-29	#REVISION21 chat rooms are open! Visit the Lounge to connect with fellow attendees. #ASMBSREVISION There's still time to register! Visit http://revision.asmbs.org - spots are filling up quickly!	1
1321	Org8	twitter	2021-01-29	It's Day 1 of RE-VISION: The Future of ASMBS Weekend Meeting! Check out the schedule of our first day. Visit http://revision.asmbs.org to view the session descriptions, speakers, and more. It's not too late to register - reserve your spot now! #ASMBSREVISION #REVISION21	1
1322	Org8	twitter	2021-01-29	Today is the day for Re-Vision please use hashtags: #Revision21 #ASMBSREVISION to communicate, collaborate, and educate.	1
1323	Org8	twitter	2021-01-28	ONE DAY Left to RE-VISION: The Future of ASMBS Weekend Meeting! There's still time to register! Visit http://revision.asmbs.org for more information. Please contact us at events@asmbs.org if you have questions regarding the meeting. #ASMBSREVISION #REVISION21	1
1324	Org8	twitter	2021-01-27	The Re-Vision Meeting has a #hashtag and it is: #Revision21 And/Or #ASMBSREVISION So...start tweeting!	1
1325	Org8	twitter	2021-01-26	Three Days Left to RE-VISION: The Future of ASMBS Weekend Meeting! Use the chat rooms in the Lounge and fill out your virtual business card to share your information with fellow attendees and grow your network. Visit http://revision.asmbs.org for more information #ASMBSREVISION	1
1326	Org8	twitter	2021-01-24	Five Days Left to RE-VISION: The Future of ASMBS Weekend Meeting! Have you registered yet? Join the conversation on social media using the official hashtag - #ASMBSREVISION and invite friends and colleagues! Visit http://revision.asmbs.org for more information.	1
1327	Org8	twitter	2021-01-22	One Week Left to RE-VISION: The Future of ASMBS Weekend Meeting! CME & CEU credits are available - including for Behavioral Health Providers! @ASMBSIH Reserve your spot for the live event PLUS have access to all recorded sessions after the meeting: http://ow.ly/xcaG50DeqIw	1
1328	Org8	twitter	2021-01-21	ASMBS is proud to support @StopWeightBias ! We believe that everyone deserves to be treated with dignity and respect - it's time to end weight discrimination and create a better world for everyone. @ObesityAction #BePartOfTheSolution #StopWeightBias http://StopWeightBias.com	12
1329	Org8	twitter	2021-01-20	New Year, New Sessions! Register for RE-VISION: The Future of ASMBS Weekend Meeting, featuring new CME/CEU courses to help you navigate the ongoing COVID-19 pandemic. Visit http://revision.asmbs.org to reserve your spot - space is limited!! #ASMBSREVISION	1
1330	Org8	twitter	2021-01-13	ASMBS members receive a discounted registration to RE-VISION: The Future of ASMBS Weekend Meeting! Go to http://revision.asmbs.org to reserve your spot. Renew your membership or become a member today. Visit http://ASMBS.org/Membership to get started. #ASMBSREVISION	1
1331	Org8	twitter	2021-01-11	WINDOW CLOSING SOON! The abstract submission deadline for the ASMBS 2021 Annual Meeting is January 13th. Click here to submit your abstract: https://asmbs.org/professional-education/annualmeeting	1
1332	Org8	twitter	2021-01-11	Don’t miss your chance to join us for brand new sessions and hot topics at RE-VISION: The Future of ASMBS Weekend Meeting. Visit http://revision.asmbs.org to register now #ASMBSREVISION	1
1333	Org8	twitter	2021-01-06	You're Invited! Join us, January 29th & 30th, for RE-VISION: The Future of ASMBS Weekend Meeting. Registration is open now! Visit http://revision.asmbs.org to reserve your spot #ASMBSREVISION	1
1334	Org8	twitter	2021-01-05	Dr. Edward Mason | The Gazette	1
1335	Org8	twitter	2021-01-04	Deadline Extended: The ASMBS 2021 Annual Meeting abstract submission window is now open through January 13th! Submit your #abstract today. Click here for more information http://ow.ly/fQ8m50CZIj1 #ASMBS21	1
1336	Org8	twitter	2020-12-28	Register now for the next #FELLOWProject lecture! Dr. Phil Schauer will be discussing The Evidence for Metabolic Surgery – Current Status and Future Directions next Friday, January 8th at 7am & 3pm EST. Visit our website for to register now! http://ow.ly/Ki4l50COtoU	1
1337	Org8	twitter	2020-12-22	Happy Holidays and Happy New Year! Thank you for your support during this unique and demanding year. We look forward to continuing to fight alongside our members and on behalf of patients worldwide for the right to evidence-based treatment for the disease of obesity.	3	"right to evidence-based treatment for the disease of obesity."
1338	Org8	twitter	2020-12-18	Earn CME/MOC/CEU credit hours at RE-VISION: The Future of ASMBS Weekend Meeting! Register now and join us January 29th & 30th - http://ow.ly/cGeQ50CPjxZ #ASMBSREVISION	1
1339	Org8	twitter	2020-12-14	“We’re trying to see how we can level the playing field, make it easier to ascend the ladder of leadership, and make the membership of ASMBS more meaningful.“ - Abdelrahman Nimeri, MD FACS #ASMBSisMe	1
1340	Org8	twitter	2020-12-08	Registration is now open for RE-VISION: The Future of ASMBS Weekend Meeting! Join us, January 29th & 30th, as we "re-vision" the future of metabolic and bariatric surgery. #ASMBSREVISION Click here to register and view the schedule: http://ow.ly/fPbi50CG8oV	11	"matabolic and bariatric surgery"
1341	Org8	twitter	2020-12-02	REMINDER: Join our expert speakers and moderators - @DrAdrianDan , @docmartin22 & @Chenbariatrics1 - this Friday for the next installment in the #FELLOWProject lecture series! Register Now: https://asmbs.org/webinars/the-fellow-project	1
1342	Org8	twitter	2020-11-26	Happy Thanksgiving from ASMBS! We hope you have a safe and healthy #ThanksgivingDay Turkey (bird)	1
1343	Org8	twitter	2020-11-26	Evidence shows bariatric surgery can lower risk of severe COVID-19 symptoms @asmbs @Ali_Aminian_MD @SOARD_JOURNAL #obesity weight loss surgery	11	bariatric surgery"
1344	Org8	twitter	2020-11-25	The @SOARD_JOURNAL @RaulRosenthalMD editor - first cohort to demonstrate that bariatric surgery reduces the chances of acquiring #covid19 #SARSCoV2 #coronavirus and dying from the #virus in patients > #BMI of 40 - first author @Ali_Aminian_MD via @NeilFlochMD @CNN @foxheadlines	11	"bariatric surgery"
1345	Org8	twitter	2020-11-23	Register now for the next installment in the #FELLOWProject! Guest lecturers, Drs. Leslie Heinberg and Gretchen Ames, will be discussing Psychologic Considerations Before & After Bariatric Surgery next Friday, December 4th at 7am & 3pm EST. Register now: http://ow.ly/xRFo50CsvxE	11	"bariatric surgery"
1346	Org8	twitter	2020-11-20	The recording of the this week's SADI-S webinar is now available! Thank you to our speakers, moderator, and all participants for a great presentation. Click here to watch now: http://ow.ly/imrw50CqhyC	1
1347	Org8	twitter	2020-11-19	"Rural healthcare is more important today than ever before. We celebrate National #RuralHealthDay as a way to acknowledge and thank rural healthcare providers and patients for their contributions." - Dr. Kevin Helling, ASMBS Rural Committee Chair #PowerOfRural	1
1348	Org8	twitter	2020-11-19	Many people keep weight-loss surgery secret — here's why I won't stop talking about it ⁦ @ASMBSIH ⁩ #bariatricsurgery weight loss surgery	11	"bariatric surgery"
1349	Org8	twitter	2020-11-18	The ASMBS 2021 Annual Meeting abstract submission window is now open! Submit your abstract today: http://ow.ly/r28J50Co5nk #ASMBS21	1
1350	Org8	twitter	2020-11-16	It's that time of the year! Renew your membership to stay involved with ASMBS in the upcoming year. Visit http://ASMBS.org/Dashboard to renew today. Not a member? Go to http://ASMBS.org/Membership for more information and to submit an application.	1
1351	Org8	twitter	2020-11-14	Today is #WorldDiabetesDay and we are proud to share http://EscapeDiabetes.org - a resource where you can read about surgery for Type 2 diabetes, calculator your risks, and find a provider to learn how you can #EscapeDiabetes! #NationalDiabetesMonth #T2DM	1
1352	Org8	twitter	2020-11-10	Join us for the ASMBS 2021 Weekend Meeting - RE-VISON: The Future of ASMBS. We'll be offering relevant new virtual courses, engaging networking events, and opportunities to connect with expert industry professionals. More information coming soon! http://ow.ly/7HSd50Cdw0S	1
1353	Org8	twitter	2020-11-09	Happening now #obsm	1
1354	Org8	twitter	2020-11-04	Join us for our next webinar - Wednesday, November 18th at 7:00 PM EST. This webinar focuses on educating the attendees on the recently ASMBS endorsed procedure, the Single Anastomosis Duodenal Switch @ASMBSIH Register Now: http://ow.ly/AzXk50CbwNh	1
1355	Org8	twitter	2020-11-03	Risk of severe coronavirus resulting in uptick of weight loss surgeries: report | Fox News	11	"bariatric surgery"
1356	Org8	twitter	2020-11-01	November is #DiabetesAwarenessMonth! Learn how surgery for diabetes can help you manage your Type 2 #diabetes. Visit http://EscapeDiabetes.org for more information. #NationalDiabetesMonth #T2DM	1
1357	Org8	twitter	2020-10-28	In this time of the global #covid19 #pandemic, all #physicians must stand up & SUPPORT the better #health of their 42% of patients who have the chronic condition of #obesity The @ASMBS stands up for their care.	3	"who have the chronic condition of #obesity "
1358	Org8	twitter	2020-10-27	With moderators - @DrAdrianDan , @docmartin22 , and @Chenbariatrics1 . Reserve your spot now! #FELLOWProject	1
1359	Org8	twitter	2020-10-27	Register now for the next installment in the #FELLOWProject! Guest lecturers, Drs. Ann Rogers & S. Julie-Ann Lloyd, will be discussing Peri-operative Management Pearl in Bariatric Surgery next Friday, November 6th at 7am & 3pm EST. Click for more: http://ow.ly/Rn2H50C2VK7	11	"bariatric surgery"
1360	Org8	twitter	2020-10-26	The recording of the @ASMBSIH “Who You Gonna Call” #Telemedicine Webinar is now available! Thank you to all participants and attendees for a great discussion! Click here to watch: http://ow.ly/MmkN50C2CN3.	1
1361	Org8	twitter	2020-10-24	Register now @ohKYASMBS @asmbs meeting 2020	1
1362	Org8	twitter	2020-10-23	Not registered? No problem! If you are a member of the @ASMBSIH Facebook group - head over to watch now! https://facebook.com/100002852671555/videos/3181736838598041/	1
1363	Org8	twitter	2020-10-23	Tonight's #Telemedicine webinar is happening! Are you tuned in? Personal computer	1
1364	Org8	twitter	2020-10-21	Last Chance to Register! Join us for tomorrow's @ASMBSIH webinar. Our three expert speakers will answer your questions and share tips for utilizing #telemedicine in your practice as the #COVID19 pandemic continues. Register Now: http://ow.ly/C2aW50BOht5	1
1365	Org8	twitter	2020-10-19	“I think it’s so important for our voices to be heard, to share ideas, and to enable action so that all of our membership feel like they have a voice at the table. “ - Janet Ng, PhD #ASMBSisME	1
1366	Org8	twitter	2020-10-11	To clarify: weight loss by diet alone, cause gut hormones to change so that patients regain weight - all of these hormones move in the opposite direction (than diet change) after patients undergo #metabolicsurgery #bariatricsurgery weight loss surgery	11	"metabolic and bariatric surgery"
1367	Org8	twitter	2020-10-09	Join us for our next @ASMBSIH webinar on Thursday, October 22nd, at 7:00 PM EDT. Our three expert speakers will answer your questions and share tips for utilizing #telemedicine in your practice as the #COVID19 pandemic continues. Register Now: http://ow.ly/C2aW50BOht5	1
1368	Org8	twitter	2020-10-07	The recording of the most recent #FELLOWProject webinar is now available! Thank you to our speakers for a great presentation. Click here to watch now and register for the upcoming November edition: http://ow.ly/YEf750BMmbA	1
1369	Org8	twitter	2020-09-30	ASMBS and @OMAsocial are partnering for a pre-con during this year's Overcoming #Obesity 2020 - Virtual on Thursday, Oct. 8! Learn about Embracing Multidisciplinary Care - Medical and Surgical Care Under One Roof and earn 7.5 CME/CE. Register today! http://ow.ly/BjIc50BFLaO	1
1370	Org8	twitter	2020-09-29	Patients Seek Surgery to Combat Major Covid-19 Risk Factor: #Obesity - @WSJ weight loss surgery #BariatricSurgery Bariatric https://wsj.com/articles/patients-seek-surgery-to-combat-major-covid-19-risk-factor-obesity-11601299708?redirect=amp#click=https://t.co/LG1RtjhEFN	7	COVID 19, weight loss surgeries, COVID 19	11	bariatric surgery
1371	Org8	twitter	2020-09-28	The @nytimes has recognized that Bariatric surgery is underused as the most effective treatment for #obesity @MattHutterMD @reneehilton30 @BariatricNews @VanceAlbaugh @JaimePonceMD @SAGES_Updates @DrEricDeMaria @CarlosCgalvani @davearterburn @PSchauerMD @Ali_Aminian_MD	11	"bariatric surgery"
1372	Org8	twitter	2020-09-28	Weight loss surgery - #bariatricsurgery is the most effective treatment for #obesity - it is being used in less than 1% of the population that could benefit from it -efforts continue for the @ASMBS @ASMBSIH to educate the public about the success of #surgery - Bariatric Surgery	11	"bariatric surgery"
1373	Org8	twitter	2020-09-25	“We are working to support our diverse membership by increasing our visibility and programming to further educational diversity, inclusion, and equity." - Dr. Crystal Johnson-Mann #ASMBSisME	1
1374	Org8	twitter	2020-09-24	Registration Now Open for ASMBS/OMA Embracing Multidisciplinary Care Pre-conference Course - https://mailchi.mp/asmbs/embracing-multidisciplinary-care	1
1375	Org8	twitter	2020-09-22	With moderators - @DrAdrianDan , @docmartin22 , and @Chenbariatrics1 . Reserve your spot now! #FELLOWProject	1
1376	Org8	twitter	2020-09-22	Register now for the next installment in The FELLOW Project! Guest lecturers, Drs. Bipan Chand & Dr. Leena Khaitan, will be discussing endoscopy for the bariatric surgeon next Friday, October 2nd at 7am & 3pm EST. Click here for more information: http://ow.ly/1n8g50By1sK	11	"bariatric surgery"
1377	Org8	twitter	2020-09-21	The recording of the Resuming Practice webinar is now available! Thank you to all participants and attendees for a great discussion! Click here to watch now: http://ow.ly/D4kU50Bx4lc Visit http://ASMBS.org/Webinars to view our full webinar archive and register more upcoming events!	1
1378	Org8	twitter	2020-09-18	#ASMBSisME with Dr. Joon Shim	1
1379	Org8	twitter	2020-09-16	A Tribute to Harvey Sugerman - Surgeon, Scientist, Educator, and Leader. Register now - https://asmbs-org.zoom.us/webinar/register/WN_HWvG31EyRwiVmZfbHOoqtw Submit A Tribute for Dr. Harvey Surgerman https://tribute.co/harvey-sugerman/	1
1380	Org8	twitter	2020-09-10	Register for our next webinar! Members from the Community/Independent Practice Committee will discuss strategies for increasing revenue stream. A question and answer session will conclude the presentation. Reserve your spot: http://ow.ly/JLEw50Bnhmv	1
1381	Org8	twitter	2020-09-01	Join our moderators for the upcoming session - @DrAdrianDan @docmartin22 @Chenbariatrics1 . Reserve your spot now! #FELLOWProject	1
1382	Org8	twitter	2020-09-01	Register now for the next installment in The FELLOW Project! Guest lecturers, Dr. Daniel Cottam & Dr. Folahan Ayoola, will be discussing the duodenal switch & SADI-S this Friday, September 4th at 7am & 3pm EST. Click here for more information: http://ow.ly/L30G50B3QrP	1
1383	Org8	twitter	2020-08-31	The recording of the @ASMBSIH Strategies for Coping with #COVID19 webinar is now available! Thank you to all participants and attendees for a great discussion! @PaulDavidsonPhD Visit http://ASMBS.org/Webinars to view our full webinar archive and register more upcoming events!	1
1384	Org8	twitter	2020-08-30	This is a major breakthrough in #US national #obesity advocacy against #stigma and discrimination @ObesityAction @JNadglowskiOAC @BariatricNews @BariatricTimes @ASMBSIH @ASMBS	12
1385	Org8	twitter	2020-08-21	#BariatricSurgery results in a reduction of All-Cause Mortality: and specifically #cancer and #cardiovascular mortality in this Population-Based Matched Cohort Study in a Universal Health Care System ⁦ @AnnalsofIM ⁩ #obesity weight loss surgery https://acpjournals.org/doi/10.7326/M19-3925#.XzwYdb1jTmk.twitter	11	"bariatric surgery"
1386	Org8	twitter	2020-08-21	#BariatricSurgery results in a reduction of All-Cause Mortality: and specifically #cancer and #cardiovascular mortality in this Population-Based Matched Cohort Study in a Universal Health Care System ⁦ @AnnalsofIM ⁩ #obesity weight loss surgery https://acpjournals.org/doi/10.7326/M19-3925#.XzwYdb1jTmk.twitter	11	"bariatric surgery"
1387	Org8	twitter	2020-08-19	It is with great pride that we announce an impact factor of 3.8 from our @SOARD_JOURNAL - thank you Harvey Sugarman MD for your life’s work and @RaulRosenthalMD	1
1388	Org8	twitter	2020-08-11	#ASMBS Mourns the Loss of an Icon Harvey Sugerman - we will miss him. We aren’t likely to see anyone like him again. https://bit.ly/3kzG8lI	1
1389	Org8	twitter	2020-08-11	It is with great sadness that we announce the loss of one of the great pioneers of #Bariatricsurgery - we will miss him greatly as a leader and a human being Harvey Sugarman MD	1
1390	Org8	twitter	2020-08-10	Join us for our next @ASMBSIH webinar on Thursday, August 27th, at 7:00 PM EST. Our three expert speakers will answer your questions and share tips for helping patients navigate new challenges and stressors presented by #COVID19 Register Now: http://ow.ly/Bo9F50AVuNP	1
1391	Org8	twitter	2020-08-06	The #UK is opening up towards #surgery as a more acceptable option for treating patients with #obesity - Partha Kar: Our approach to tackling obesity needs rethinking | The BMJ	11	"bariatric surgery"
1392	Org8	twitter	2020-08-04	Reminder! Registration is open for the first Fellow Project webinar - this Friday, August 7th, at 7am & 3pm EST. Click here for more information and to reserve your spot now: https://asmbs.org/webinars/the-fellowship-project @docmartin22 @DrAdrianDan	1
1393	Org9	twitter	2021-01-29	Thinking about how you’re going to share your research results? Submit an abstract to the Canadian Obesity Summit! Abstracts must be submitted here https://buff.ly/2XP61nL before Feb. 18th. We are looking forward to reading it!	1
1394	Org9	twitter	2021-01-26	Exactly two weeks left to apply for the professor position	1
1395	Org9	twitter	2021-01-26	in Health: Promotion, Prevention and Precision Approaches! Get the details here https://buff.ly/3qhPZyV and submit your application by Feb. 8th!	1
1396	Org9	twitter	2021-01-15	Struggling to jump back into your work after the holidays? Why not start by watching a webinar from	1
1397	Org9	twitter	2021-01-15	! Don’t speak French? No worries, you can select captions in English! Check out the videos here: https://buff.ly/2LuRwCH	1
1398	Org9	twitter	2020-11-05	Nouvelle année, nouvelles expériences! Soumettez votre candidature pour la bourse Fernand-Seguin avant le 14 mars pour une chance d’apprendre le métier de journaliste scientifique auprès de professionnel.le.s qualifié.e.s → https://buff.ly/3qAkqRA	1
1399	Org9	twitter	2020-11-25	Joyeux Noël et joyeuses fêtes! Nous vous offrons tous nos meilleurs vœux Qu'attendez-vous de cette période des fêtes? Notre exécutif a répondu à cette question ici https://buff.ly/2WMUcOm	1
1400	Org9	twitter	2020-11-07	Khushmol, our Vice Chair, wrote a blog post about how to start your own OC-SNP chapter. Maybe something to think about doing in the new year? Check out the blog post to find out more and don't hesitate to reach out! https://buff.ly/35AombB	1
1401	Org9	twitter	2020-11-02	Have you seen our From Grad School & Beyond series? Interested in contributing? We'd love to chat! Is there someone we should reach out to? Let us know! Check out our latest blog post for more info on how you can help us keep this video series going https://buff.ly/2ULd27j	1
1402	Org9	twitter	2020-11-26	This #DOHaD newsletter highlights some cool work in the field of #nutrition and #pregnancy Check it out!	1
1403	Org9	twitter	2020-11-05	Today, we would like to introduce you to	1
1404	Org9	twitter	2020-09-27	Announcing the 2019-2020 OC-SNP Awards results! Thank you to those who submitted nominations and CONGRATULATIONS to the winners! We are proud of the work you are doing and thankful for your contributions to obesity research https://buff.ly/3mJ4pH8	1
1405	Org9	twitter	2020-09-25	In our latest blog post, Audrey St-Laurent welcomes this year's OC-SNP National Executive Team! Check it out to meet the NEW team and see what we'll be up to this coming year https://buff.ly/2Hm7Ino	1
1406	Org9	twitter	2020-09-11	Have you missed OC-SNP latest webinar on weight bias, mental health, and COVID-19 or do you want to watch it again and again? Well, you don't have to wait any longer. The full webinar is available right here https://buff.ly/2ZvgN3t Enjoy!	1
1407	Org9	twitter	2020-08-28	OC-SNP Awards are Open ! This is your VERY LAST CHANCE - We will be accepting nominations until August 31st. Check out our latest blog post from our Vice Chair, Rebecca, for more information https://buff.ly/2YxSkdD	1
1408	Org9	twitter	2020-08-10	From Grad School and Beyond series: Dr. Taniya S. Nagpal talks about her involvement in OC-SNP and about being engaged in both a traditional academic and a non-academic environment after her grad school in health sciences. Enjoy!	1
1409	Org9	twitter	2020-08-03	From Grad School and Beyond series: Dr. Meghan McGee talks about getting out of your comfort zone and taking advantage of all opportunities that come your way. Enjoy!	1
1410	Og11	facebook	2021-01-28	Attend the #ObesityMedicine2021 Denver, CO | Virtual Conference to get access to NEW education on advanced obesity treatment techniques and UPDATED obesity medicine trends. Register today to earn 30 CME/CE and save $300 with early-bird pricing: https://obesitymedicine.org/spring/pricing/ #OMA2021 #continuingeducation #cme #physician #obesitymedicine #obesityisadisease	3	"#obesityisadisease"
1411	Og11	facebook	2021-01-27	A recent study shows that the longer a patient experiences obesity, the greater their chances are of experiencing #cardiometabolic diseases. Researchers say this report offers evidence for the importance of delaying early-onset #obesity in young patients. https://www.healthline.com/.../the-duration-of-obesity...	7	cardiometabolic diseases
1412	Og11	facebook	2021-01-25	Patients with #obesity and type 2 #diabetes are at an increased risk for non-alcoholic fatty liver disease. Addressing this disease with at-risk patients can prevent serious complications, such as liver #cancer and #cirrhosis. https://onlinelibrary.wiley.com/doi/full/10.1002/osp4.465	7	non-alcoholic fatty liver disease, cancer cirrhosis
1413	Og11	facebook	2021-01-21	The calendar has flipped, and we have started the New Year. As we all hope for a better year ahead of us, we continue to face the reality of #COVID_19. If you are stuck indoors due to work/school from home or must self-isolate after exposure, this article presents a few suggestions to help you practice #selfcare strategies during #quarantine. https://obesitymedicine.org/9-self-care-strategies-to.…	1
1414	Og11	facebook	2021-01-20	The updated 2021 Obesity Algorithm® is NOW AVAILABLE! These evidence-based guidelines are a tool to help #healthcare providers make informed decisions when treating patients with #obesity. Updates include: - Metabolic syndrome - Update to Women and Obesity - Lipedema - Fruit Versus High Fructose Corn Syrup - And More! Purchase your eBook or pre-order your print copy today! https://obesitymedicine…	1
1415	Og11	facebook	2021-01-19	A study published in the medical journal Cancer reveals that #obesity may be a major factor in Black American women being 40% more likely to die from early #breastcancer than white patients. https://www.usnews.com/.../obesity-plays-role-in-higher...	7	breast cancer mortality
1416	Og11	facebook	2021-01-17	#ObesityMedicine2021, April 21-25, is the leading medical obesity conference providing clinical obesity treatment education for #healthcare providers. Learn to assess, diagnose, counsel, and treat patients with #obesity more effectively. Register today for onsite in Denver, CO or virtually!https://obesitymedicine.org/spring/ #OMA2021 #continuingeducation #cme #physician #obesitymedicine #obesityi…	1
1417	Og11	facebook	2021-01-15	With your help, we can advocate for real change, stop weight bias and create a better future for all. #bepartofthesolution #stopweightbias StopWeightBias.com	12
1418	Og11	facebook	2021-01-15	More than 1,400 physicians applied to sit the 2021 #ABOM Certification Exam coming up in February! With the increasing scientific evidence showing that obesity pre-disposes patients to complications from diseases like #COVID-19, physicians are driven to gain the knowledge and skillset to treat #obesity first. https://www.abom.org/2021-exam-applicant-growth/	7	COVID-19 Complications
1419	Og11	facebook	2021-01-14	The ABOM exam is coming up Feb. 18-25, 2021! Take the exam with confidence knowing that you prepared using top-rated resources from the Obesity Medicine Association (OMA), the leading accredited provider of clinical #obesity education. Purchase your prep materials today! https://obesitymedicine.org/review-course-for-abom-exam/ #physicians #primarycare #familymedicine #obesity epidemic #medicaledu…	1
1420	Og11	facebook	2021-01-13	Are you ready to join the movement and become part of the solution? Let’s Stop Weight Bias! #bepartofthesolution #stopweightbias StopWeightBias.com	1
1421	Og11	facebook	2021-01-12	As the #pandemic continues, we know that patients with obesity are at a greater risk for complications from COVID-19. Join us for an upcoming webinar about the state of the science known today connecting obesity and COVID-19. Register now: https://bit.ly/3nhtBn3 Remember: Webinars are FREE for OMA members and $24 for non-members. #COVID_19 #obesity #diabetes	7	COVID-19 Complications
1422	Og11	facebook	2021-01-11	PCOS impacts 6 to 12% of women who are of reproductive age in the United States. This article focuses on exercises that can assist your patients with PCOS to mitigate the risk of also developing sleep apnea, high blood pressure, and overweight or obesity. https://www.healthline.com/.../womens.../exercise-for-pcos	1
1423	Og11	facebook	2021-01-09	Don’t miss out! You have three chances in 2021 to attend a virtual Fundamentals of Obesity Treatment course. Reserve your spot to earn 9.5 CME/CE and build your foundational knowledge of the four pillars of clinical obesity treatment: Nutrition, Physical Activity, Behavior, and Medication. Get dates and details here: https://obesitymedicine.org/.../fundamentals-of-obesity.../ #physicians #familym…	11	"illars of clinical obesity treatment: Nutrition, Physical Activity, Behavior, and Medication"
1424	Og11	facebook	2021-01-08	Researchers at The University of Texas Health Science Center at Houston (#UTHealth) recently published a study examining the connections between #obesity, stem cell proliferation, and the premature senescence of cells and tissue. https://www.news-medical.net/.../Study-explores-link...	1
1425	Og11	facebook	2021-01-06	Women with obesity and PCOS have numerous health risks, some that reach into future generations. Given the overlapping relationship between #obesity, #PCOS, and insulin resistance, #clinicians need strategies that address all three. Join OMA to learn more about Optimizing Polycystic Ovarian Syndrome Treatment by Treating Obesity First next Wednesday, Jan. 13 at 6:00 Eastern! Register now: https:/…	1
1426	Og11	facebook	2021-01-04	What new research do we have concerning #COVID_19 and #obesity? OMA Chief Science Officer, Dr. Harold Bays interviews Dr. Deborah Bade Horn about a recent article analyzing the association between COVID-19 and obesity. LISTEN NOW: https://obesitymedicine.org/.../episode-30-article.../	1
1427	Og11	facebook	2020-12-29	Join OMA April 21-25 for the Overcoming #Obesity 2021 Hybrid Conference and earn up to 30 CME/CE! And . . . make sure to take advantage of early-bird registration to receive up to $300 off! #diabetes #healthcare #physician #primarycare REGISTER NOW: https://obesitymedicine.org/spring/	1
1428	Og11	facebook	2020-12-25	As we reflect on this challenging year, we couldn't be more grateful for all of our OMA members and supporters. THANK YOU for making this year a success. Have a happy and healthy Holiday Season!	1
1429	Og11	facebook	2020-12-22	A recent British study found that experiencing #psychological distress is associated with a 33% increased risk of being diagnosed with diabetes. Stress is associated with poor sleep, poor nutrition, and hormonal imbalances which can make individuals experiencing stress more vulnerable to developing #diabetes. #obesityepidemic #primarycare #familymedicine #nutritionist https://bit.ly/3lzOXvn	1
1430	Og11	facebook	2020-12-22	Registration is NOW OPEN for the Obesity Medicine 2021 conference! Join us April 21-25 in #Denver, CO or virtually to earn up to 30 CME/CE. Come together with your colleagues and other experts in the field to engage in education and critical conversations that will help you better manage your patients' obesity-related conditions. Register now: https://obesitymedicine.org/spring #primarycare #obes…	1
1431	Og11	facebook	2020-12-21	What are the connections between diabetes and #obesity treatment? Listen in to the latest episode of Obesity: A Disease podcast! In this episode, Dr. Nicholas Pennings and guest Dr. Fujioka discuss different strategies for treating diabetes and obesity. Topics covered include body fat distribution and diabetes risk, benefits of #weightloss on #diabetes and insulin sensitivity, and impact of diabe…	7	diabetes
1432	Og11	facebook	2020-12-19	This study, presented at The European and International Congress on #Obesity this fall, shows the connections between screen time, sleep, and weight gain among children. Researchers found that reducing screen time among children can have a positive impact on weight and sleeping patterns. #childhoodobesity #pediatrics #obesityepidemic #screentime https://bit.ly/36ArR3p.	5	screen time and sleep
1433	Og11	facebook	2020-12-17	This study examined how adults enrolled in an online #weight-loss program are adapting to #COVID_19 restrictions. Researchers found that participants felt their #stress levels increase due to having less time and access to what they need to focus on their weight-loss efforts. #obesityepidemic #obesitymedicine #primarycare https://onlinelibrary.wiley.com/doi/full/10.1002/osp4.465	1
1434	Og11	facebook	2020-12-17	The U.S. adult #obesity rate has surpassed 40%. To help address this important issue @STOPobesity has released the NEW #WeightCantWait guide to provide short, accessible and practical information on effective #obesity management. go.gwu.edu/weightcantweight #primarycare	1
1435	Og11	facebook	2020-12-15	A lack of adequate sleep is associated with an increase #BMI. With the help of #fitnesstrackers that also track sleeping patterns, researchers collected data from 120,000 people to gain a better understanding of how #sleep impacts weight gain. https://www.healthline.com/.../why-poor-sleep-can-lead-to...	5	screen time and sleep
1436	Og11	facebook	2020-12-14	Join Robard Corporation and OMA on Dec. 17 at 12 pm EST to learn more about the Clinical Case Review of the New Direction Products & Medical Program for Obesity Treatment. This webinar is FREE for all attendees. Register today! https://bit.ly/3orZme8 #obesityepidemic #primarycare #physicians #obesitymedicine	1
1437	Og11	facebook	2020-12-11	Winter has always made exercising a bit more challenging. With gym access restricted due to #COVID_19 guidelines, how do you plan to keep moving this #winter? What advice are you sharing with your patients? #FitnessFriday #obesitymedicine #workout #obesity	1
1438	Og11	facebook	2020-12-09	Join OMA and Rhythm Pharmaceuticalson on Dec. 15 at 12 pm EST to take a closer look at early-onset obesity differently. This webinar is FREE for all attendees. Register today!https://bit.ly/36TeJ9O #obesity #obesityepidemic #primarycare #physician	1
1439	Og11	facebook	2020-12-08	60-80% of women with PCOS also have overweight or obesity, putting them at an increased risk for cardiovascular disease, #diabetes, and other metabolic issues. LISTEN to the latest episode of Obesity: A Disease Podcast to learn more about the connection between PCOS and Obesity. The Obesity: A Disease Podcast is FREE for all listeners. Tune in now! https://obesitymedicine.org/.../episode-28-artic…	7	cardiometabolic diseases, diabetes
1440	Og11	facebook	2020-12-08	This study analyzed factors that may predict weight gain during #COVID_19 self-quarantine, utilizing on-line surveys regarding weight change and known risk factors associated with weight gain. Twenty-two percent of respondents gained at least 5-10% while self-quarantined correlated with inadequate sleep, snacking, stress eating, and reduced physical activity. https://www.ncbi.nlm.nih.gov/.../PMC7…	5	screen time and sleep inadequate sleep, snacking, stress eating, and reduced physical activity.
1441	Og11	facebook	2020-12-07	In a recent article, OMA Member Dr. Timothy Logemann discusses how the obesity epidemic is worsening the current #covid_19 pandemic. https://wausaudailyherald-wi-app.newsmemory.com/…	1
1442	Og11	facebook	2020-12-03	Obesity affects nearly 13.7 million children and adolescents in the U.S. It is now more important than ever to learn about other factors, such as ADHD that could play a role in a child's weight gain. Join us on Dec. 10 at 12 pm EST to learn about the Co-occurrence of Pediatric Obesity and ADHA: Implications for Collaborative Management and earn 1 CME/CE. Remember: CME/CE Webinars are ALWAYS free …	1
1443	Og11	facebook	2020-11-30	#BlackFriday deals are extended today for #CyberMonday! Order all your #obesity medicine resources, books, online CME, and membership to get an extra 20% off. Order NOW before the sale ends tonight! https://obesitymedicine.org/black-friday-cyber-monday-sale/	1
1444	Og11	facebook	2020-11-27	SHOP NOW! Black Friday sales are here! Today through Nov. 30, receive 20% off membership, online CME, books, and practice resources! https://obesitymedicine.org/black-friday-cyber-monday-sale/ #obesity #obesitymedicine #primarycare #familymedicine #obesityepidemic #medicaleducation #diabetes #healthcare	1
1445	Og11	facebook	2020-11-26	OMA wishes you and your family a happy and healthy Thanksgiving!	1
1446	Og11	facebook	2020-11-25	COMING SOON! Save big with upcoming Black Friday deals Nov. 27 through Nov. 30, 2020! Get the tools you need to effectively treat #obesity and run a successful practice in 2021. Preview the sale now: https://obesitymedicine.org/black-friday-cyber-monday-sale/ #medicaleducation #primarycare	1
1447	Og11	facebook	2020-11-23	OMA Past President Dr. Wendy Scinta was recently featured on the Primary Care Podcast. In this episode, Dr. Scinta discusses her medical school experience and her path to becoming a family medicine obesity medicine specialist. Tune in now! https://apple.co/3n2UKLA	1
1448	Og11	facebook	2020-11-20	COMING SOON! Save big with upcoming Black Friday deals Nov. 27 through Nov. 30, 2020! Get the tools you need to effectively treat #obesity and run a successful practice in 2021. Sign-up to be reminded when the sale begins: https://obesitymedicine.org/bf-interest-form/ #medicaleducation #primarycare	1
1449	Og11	facebook	2020-11-16	Why we eat is just as important as what we eat. Tune in to OMA's latest episode of #Obesity: A Disease podcast, Clinical Conversations: Behavioral Interventions in Lifestyle Change In this episode, you'll learn about the key roles #nurses and nurse practitioners play in treating obesity, how a practice can implement intensive behavioral therapy and more! OMA's Obesity: A Disease podcast is FREE f…	1
1450	Og11	facebook	2020-11-14	Did you miss the Overcoming #Obesity 2020 Virtual conference this fall? You can now purchase the recordings! These conference recordings will help you learn practical strategies for treating #obesity across the lifespan and allow you to earn 30+ CME/CE. Get more information here: https://bit.ly/36sQOMZ #primarycare #familypractice #physician #omaeducation #obesity #obesityepidemic	1
1451	Og11	facebook	2020-11-12	There are still a few spots left for our Fundamentals of Obesity Treatment Virtual Course starting tomorrow! This is a 2-day interactive virtual course offering introductory education for evaluating, diagnosing, and treating #obesity in a clinical setting. Visit obesitymedicine.org/fun to register for the Nov 13-14 session and earn 9.5 CME/CE!	1
1452	Og11	facebook	2020-11-12	Type 2 #diabetes and #obesity often go hand in hand. Join Dr. Jennifer L. Kirby next Wednesday, Nov. 18 at 6:00 PM EST for her upcoming webinar: Viewing Type 2 Diabetes Through the Lens of Obesity to learn strategies for helping your patients with type 2 diabetes. Register today! https://bit.ly/2IoMhCD REMINDER: OMA Webinar's are ALWAYS FREE for Members and $24 for Non-Members. #primarycare #obes…	1
1453	Og11	facebook	2020-11-11	The discipline is emerging, the opportunities are exploding! Is subspecialty training in #ObesityMedicine right for you? Applications are still being accepted! Visit https://omfellowship.org/application/ to apply by December 2 and launch your career as a clinical and academic leader in #obesity. #primarycare #medicalschool #earlycareer #fellowship	1
1454	Og11	facebook	2020-11-10	The average #American gains 5 pounds during the holiday season. Dr. Anna Welcome has gathered some of her favorite healthy eating tips to share with your patients. What are some of your tried and true healthy eating tips for the #holidayseason? https://obesitymedicine.org/eating-healthy-during-the.../	1
1455	Og11	facebook	2020-11-09	In a recent Your #Diabetes Breakthrough podcast, Fellow of the #Obesity Medicine Association Dr. Nicholas Pennings discusses the important connections between diabetes and obesity. Pennings covers the relationship between insulin and weight gain, how to treat obesity, and more! Listen in now! https://apple.co/38768RE	4	insulin
1456	Og11	facebook	2020-11-06	Only ONE week until our last Fundamentals of Obesity Treatment Virtual Course of 2020! Earn 9.5 CME/CE and learn about the evidence-based approaches for evaluating, diagnosing, and treating obesity in a clinical setting. Don’t miss out! Register now for the Nov 13-14 course. obesitymedicine.org/fun	1
1457	Og11	facebook	2020-11-05	Have a minute? We invite you to take this brief survey about about identifying and diagnosing patients with a rare disorder of obesity. https://poll.app.do/genetic-testing-3043480	1
1458	Og11	facebook	2020-11-04	OMA President Dr. Craig Primack recently contributed a recap of the Overcoming Obesity 2020 - Virtual Conference to Bariatric Times. Read the article below to catch up on the key takeaways from the conference! https://bariatrictimes.com/treating-obesity-across-the.../	1
1459	Og11	facebook	2020-11-03	Do your patients use wearable technology to keep track of their fitness goals? Tune in to OMA's latest episode of Obesity: A Disease podcast, Article Reviews: Wearable Technologies and Physical Activity. In this episode, you'll learn about the ways you can incorporate wearables into your practice, downsides to wearable technology, and how we can use the data from wearables to impact obesity treat…	1
1460	Og11	facebook	2020-11-02	OMA committee member and mentor Aparna Chandrasekaran, M.D. recently wrote an article about COIVD-19 and the need to manage obesity within patients. Learn more about the relationship between obesity and COVID-19 and the best ways to support patients during this time. https://www.medicaleconomics.com/.../covid-19-pandemic...	1
1461	Og11	facebook	2020-11-02	Please take a moment to participate in this brief survey about identifying and diagnosing patients with a rare disorder of obesity. https://poll.app.do/genetic-testing-3043480	1
1462	Og11	facebook	2020-10-30	Join us Nov. 13-14 for our final Fundamentals of Obesity Treatment Virtual Course of the year! This is a 2-day interactive virtual course offering introductory education about the evidence-based approaches for evaluating, diagnosing, and treating obesity in a clinical setting. Sign up today and earn 9.5 CME/CE! Register now: obesitymedicine.org/fun #physicians #obesity #familymedicine #familyprac…	1
1463	Og11	facebook	2020-10-29	Listen in to the latest Summit for Wellness podcast featuring OMA Board Member Dr. Lydia Alexander! Learn about the pillars of successful #obesity treatment and meeting patients where they are at on their weight loss journey. #familymedicine https://summitforwellness.com/132	1
1464	Og11	facebook	2020-10-28	While this study does not diminish the importance of #bariatric therapy, researchers learned that adults with type 2 #diabetes who underwent diet therapy improved their #metabolic health. https://www.healio.com/.../gastric-bypass-diet-therapy…	1
1465	Og11	facebook	2020-10-27	The Updated 2020-2022 Pediatric Obesity Algorithm is NOW AVAILABLE! These evidence-based guidelines are a clinical tool to help you make informed decisions when treating obesity in children. #childhoodobesity #pediatrics #Pediatricians Purchase Today: https://obesitymedicine.org/childhood-obesity/	1
1466	Og11	facebook	2020-10-26	Not all meal replacements are equal. Attend this upcoming FREE webinar on Oct. 28 at 6 PM EST to learn about the multiple applications of meal replacements. You'll learn about pre-op diets, diets for patients who have had #Metabolic and #Bariatric Surgery, and how #nutrition and ingredients matter. Register now: https://bit.ly/3lLPuuv	1
1467	Og11	facebook	2020-10-23	Join us Nov. 13-14 for a Fundamentals of Obesity Treatment Virtual Course! This is a 2-day interactive virtual course offering introductory education about the evidence-based approaches for evaluating, diagnosing, and treating obesity in a clinical setting. Sign up today and earn 9.5 CME/CE! Register today: https://obesitymedicine.org/fun #publichealth #obesity #familymedicine #professionaleducat…	1
1468	Og11	facebook	2020-10-21	Learn more about nutritional interventions for patients with #obesity from this week's Obesity: A Disease podcast. In this free episode, Dr. Pennings, Dr. Ettinger, and Dr. Ozner discuss commonalities between nutritional interventions, strategies for dietary adherence, and the role of omega 3 fatty acid supplements as relating to nutritional strategies. #obesitymedicine #obesityisadisease #family…	3	#obesityisadisease
1469	Og11	facebook	2020-10-20	The FDA approved drug Liraglutide is shown to help patients lose weight by suppressing their appetite. Now, researchers are learning more about how this #medication engages with the the brain to impact food intake and energy expenditure. #obesitymedicine https://bit.ly/34VFRTf.	11	drug
1470	Og11	facebook	2020-10-19	Have you been using telemedicine to treat patients? Are you in need of some strategies to improve your telehealth approach? Join Dr. Angela Fitch on Wed. Oct 21 @ 12 PM EST to learn more about Clinical Strategies Optimizing Obesity Treatment via Telemedicine. Register: https://bit.ly/3k1PF4p	1
1471	Og11	facebook	2020-10-16	The American Academy of Pediatrics came out in support of bariatric surgery as an "evidence-based effective treatment of severe obesity" for patients 13 years and older. https://www.inquirer.com/.../obesity-teens-bariatric…	11	bariatric surgery
1472	Og11	facebook	2020-10-14	35% of patients who underwent bariatric surgery sustained remission of #hypertension after #gastricbypass, while others were able to reduce their use of hypertension medication. https://www.prnewswire.com/.../bariatric-surgery-reduces…	1
1473	Og11	facebook	2020-10-11	Today is the FINAL day of the Overcoming Obesity 2020 - Virtual Conference! Thank you to all attendees for joining us! Dr. Bays kicked-off the day with his session on Anti-Obesity Medications in the Pipeline. Learn more here: https://obesitymedicine.org/fall/ #OMA2020 #OvercomingObesity2020 #obesitymedications #medications	1
1474	Og11	facebook	2020-10-10	Dr. Louis Arrone starts off day two of #OvercomingObesity2020 with his keynote address on harnessing technology and software to fight the #obesity epidemic. #OMA2020	1
1475	Og11	facebook	2020-10-09	Are you attending Overcoming #Obesity 2020 - Virtual? Today we kicked-off the Fall Obesity Summit! Dr. Adarsh Gupta just wrapped up his presentation on the Effects of High-intensity Training vs. Low-intensity Training in Patients with Obesity. "To better understand the effects of high-intensity and low-intensity training in patients with obesity, we first need to better understand the types of mu…	1
1476	Og11	facebook	2020-10-08	Hurry! There is still time to register for the Overcoming Obesity 2002 - Virtual conference! Join Melanie K. Bean, PhD on Fri. Oct. 9, to learn more about Motivational Interviewing and Pediatric Obesity! Register Now: https://lnkd.in/dHCtnUy #pediatricobesity #obesity #OMA2020 #overcomingobesity2020	1
1477	Og11	facebook	2020-10-07	The Overcoming Obesity 2020 - Virtual Conference starts TODAY! Learn more about "Treating Obesity in Socioeconomically Disadvantaged Urban and Rural Communities" from Dr. Verlyn Warrington during the Special Populations Track offered Saturday, October 9th during the conference. Learn more about her research in the article below! Interested in attending Dr. Verlyn Warrington's session? Click here …	1
1478	Og11	facebook	2020-10-07	Join Dr. Harold Bays during the Overcoming Obesity 2020 - Virtual Conference for his presentation discussing the Antiobesity Drugs in Development. Dr. Bays has served as an investigators for nearly 500 clinical trials over the course of 30 years. While in the past there wasn't a lot of movement in the development of antiobesity medications, within the past few years Bays has seen great improvemen…	1
1479	Og11	facebook	2020-10-06	Are Workplace Wellness programs effective? Listen in to this week's free Obesity: A Disease podcast to dive deeper into the effectiveness of workplace programs and explore ideas around cost, health outcomes, chronic disease, and changing employment trends. #familypractice #podcast #healthcare #workplacewellness Click the link in our bio to listen!	1
1480	Og11	facebook	2020-10-05	Join us starting THIS WEDNESDAY for the Overcoming #Obesity 2020 – #Virtual #Conference and earn up to 30 CME/CE! With the theme of Treating Obesity Across the Lifespan, the conference will equip you with practical strategies to conquer any case you encounter in practice. #OMA2020 #omaeducation Check out the link in our bio to register! obesitymedicine.org/fall/	1
1481	Og11	facebook	2020-10-02	The Overcoming Obesity 2020 - Virtual Conference is just around the corner! Join Dr. Dike Drummond on Friday, Oct 9 from 10:00 - 11:30 am EDT for his session "Navigating the Whirlwind: Burnout, COVID-19 and Your Personal Path Forward". Dr. Dummond is the leading coach, trainer, and consultant on preventing clinician burnout. Dr. Drummond is a Mayo-trained family doctor, professional coach, author…	1
1482	Og11	facebook	2020-09-30	The Overcoming Obesity 2020 – Virtual Conference begins in one week! Register today to earn up to 30 CME/CE and learn how to treat obesity across the lifespan! obesitymedicine.org/fall/ #OMA2020	1
1483	Og11	facebook	2020-09-29	Join Dr. Harold Bays during the Overcoming Obesity 2020 - Virtual Conference for his presentation on Psychiatric Disease and Obesity Medicine. This session will not only deepen the understanding of Psychiatric Disease and Obesity Medicine for practicing ABOM physicians, but it will also help those studying for the ABOM exam expand their knowledge and prepare for this portion of the exam. #obesity…	1
1484	Og11	facebook	2020-09-28	The Obesity Medicine Association (OMA) would like to commend Dr. Akshay B. Jain on the excellent article in Medscape , “Obesity and the Bitter Pill of Truth.” This article nicely details that the disease of obesity and individuals affected by it remain highly stigmatized. At the OMA, we have sought to fill those gaps by providing high-quality and scientifically valid medical education on obesity.	3	"the disease of obesity and individuals affected by it remain highly stigmatized"
1485	Og11	facebook	2020-09-25	ASMBS - The American Society for Metabolic and Bariatric Surgery and OMA are partnering for a pre-conference during this year's Overcoming Obesity 2020 - Virtual on Thursday, Oct. 8! Learn about Embracing Multidisciplinary Care - Medical and Surgical Care Under One Roof and earn 7.5 CME/CE. Register today! https://obesitymedicine.org/fall/	1
1486	Og11	facebook	2020-09-25	"...for the 6 in 10 Americans that suffer from at least one chronic disease, making them 12x more likely to die from COVID-19, the prospect of going back to ‘normal’ can be terrifying." Learn some way you can support those with chronic illness during this time from Dr. Sarah Hallberg, Obesity Medicine Association Fellow. https://www.caredash.com/.../5-ways-to-support-someone...	1
1487	Og11	facebook	2020-09-24	Join Dr. Adarsh Gupta to learn about Effects of High-intensity Training vs. Low-intensity Training in Patients with #Obesity at 2:45 – 3:45 PM on Friday, October 9 during the Overcoming Obesity 2020 - Virtual Conference. Register today! https://lnkd.in/dHCtnUy #OMA2020 #omaeducation #familymedicine #healthcareprovider	1
1488	Og11	facebook	2020-09-23	Join us for the Overcoming #Obesity 2020 – Virtual Conference October 7-11 to earn up to 30 CME/CE. With the theme of Treating Obesity Across the Lifespan, the conference will equip you with practical strategies to conquer any case you encounter in practice. Register today! obesitymedicine.org/fall/ #OMA2020 #omaeducation	1
1489	Og11	facebook	2020-09-22	The Mexican state of Oaxaca has the highest childhood #obesity rate in the country. Officials have now banned sugary drinks and food items to help reduce obesity and diabetes rates. This move also comes at time when the country is experiencing a high number of COVID-19 cases. #pediatricobesity #publichealth https://www.bbc.com/news/world-latin-america-53678747	1
1490	Org11	facebook	2020-09-18	"I went thinking I knew quite a bit about obesity, and I was amazed at how much the science of obesity had advanced . . . For me, this conference was life changing!" Register for upcoming Overcoming Obesity 2020 - Virtual Conference today, earn 30 CME/CE and learn about the https://obesitymedicine.org/fall/ #OMA2020	1
1491	Org11	facebook	2020-09-17	At 42.4%, the nation's adult obesity rate passed the 40% mark for the first time according to TFAH's new report on the #stateofobesity. #obesityfacts https://www.tfah.org/report-details/state-of-obesity-2020	1
1492	Org11	facebook	2020-09-17	The Overcoming #Obesity 2020 – Virtual Conference is coming up! Register today to earn up to 30 CME/CE and learn how to treat obesity across the lifespan! obesitymedicine.org/fall/ #OMA2020 #omaeducation	1
1493	Org11	facebook	2020-09-16	The Overcoming Obesity 2020 - Virtual Conference is a 5 day event with multiple tracks to choose from. This fall's virtual conference features live Q&As, virtual networking, and more! Register today: https://obesitymedicine.org/fall/	1
1494	Org11	facebook	2020-09-16	Dr. Alexander, Obesity Medicine Association Board Member, contracted #COVID-19 earlier this year. Since recovering from COVID-19, Dr. Alexander has launched a nonprofit called “World Without COVID,” participated in observational studies, and donated #plasma. https://bit.ly/3m0FvCF	1
1495	Org11	facebook	2020-09-15	The Obesity Medicine Association (OMA) is turning 70 this year! "It is a huge honor to be apart of OMA and to follow the legacy of those doctors who created an organization that cares about obesity medicine, preventing disease, and improving health." - Dr. Doris X. Munoz-Mantilla. Become a member today! https://obesitymedicine.org/join	1
1496	Og11	facebook	2020-09-15	Childhood #obesity is a global public health concern, particularly in low-income countries. The factors leading to obesity are different for wealthy and poorer nations. Researchers at the Yale School of Medicine have found that in some countries soda consumption has drastically increase due to a lack of access to clean water. #pediatricobesity https://news.yale.edu/.../causes-childhood-obesity...	1
1497	Org11	facebook	2020-09-14	There are a lot of myths when it comes to #obesity and obesity treatment. From dieting to implicit biases, some of these myths can create barriers to your patients' success. Listen to OMA's latest free podcast episode, Clinical Conversations: Addressing Obesity Treatment Myths to learn more about different ways you can overcome these myths with your patients and find the best individualized treat…	1
1498	Org11	facebook	2020-09-10	Register today for the Overcoming Obesity 2020 – Virtual Conference conference! Join us October 7-11 to earn up to 30 CME/CE. Come together in a virtual environment with your colleagues and other experts in the field to engage in education and critical conversations taking place that will help you better manage your patients' obesity-related conditions and help your patients improve their overall…	1
1499	Og11	facebook	2020-09-08	Researchers at the Universitat Pompeu Fabra in Barcelona, Spain examined data from 1,301 children ages 6 to 11 years of age and found that exposure to air pollution and smoke #pollution were associated with an increased BMI. Higher BMI levels were associated with cooper and cesium in the blood stream. #pediatricobesity https://medicalxpress.com/.../2020-08-environmental...	5	environmental factors (air and smoke pollution)
1500	Og11	facebook	2020-09-03	Researchers at the University of Texas Health Science Center in Austin discovered that neonatal adiposity increased a child's risk of being overweight or experiencing #obesity from ages 2 to 6 years. #healthcare #pediatrics https://pediatrics.aappublications.org/.../11/peds.2020-0737	5	Neonatal adiposity
[truncated: 6,605 more rows]

## Sheet: code
irrelevant	1
Target audience of the message	2
Obesity as a chronic disease	3
Causes of obesity	4
Risk factors to develop obesity as a disease	5
Symptoms	6
Complications or obesity-associated diseases	7
Quality of life	8
Prevention	9
[truncated: 3 more rows]
